# Supplementary material for: Chromosome-level genome assembly of Ophiorrhiza pumila reveals the evolution of camptothecin biosynthesis
Source: PubMed Central journal article supplement (PMC7810986; doi:10.1038/s41467-020-20508-2), 2021-01-15
Supplement: 41467_2020_20508_MOESM1_ESM.pdf [file 41467_2020_20508_MOESM1_ESM.pdf]

Supplementary Materials for

**Chromosome-level genome assembly of *Ophiorrhiza pumila* reveals the  
evolution of camptothecin biosynthesis**

**Authors:** Amit Rai<sup>1,2\*\$</sup>, Hideki Hirakawa<sup>3</sup>, Ryo Nakabayashi<sup>4</sup>, Shinji Kikuchi<sup>2,5</sup>, Koki Hayashi<sup>1</sup>, Megha Rai<sup>1</sup>, Hiroshi Tsugawa<sup>4,6</sup>, Taiki Nakaya<sup>1</sup>, Tetsuya Mori<sup>4</sup>, Hideki Nagasaki<sup>3</sup>, Runa Fukushi<sup>5</sup>, Yoko Kusuya<sup>7</sup>, Hiroki Takahashi<sup>2,7</sup>, Hiroshi Uchiyama<sup>8</sup>, Atsushi Toyoda<sup>9</sup>, Shoko Hikosaka<sup>2,5</sup>, Eiji Goto<sup>2,5</sup>, Kazuki Saito<sup>1,2,4</sup> and Mami Yamazaki<sup>1,2\*</sup>

\*Correspondence to: mamiy@faculty.chiba-u.jp (M.Y); amit.ra@chiba-u.jp (A.R)

**Supplementary Table 1. Karyotype measurements for *Ophiorrhiza pumila* chromosomes.**

| <b>Chromosome</b> | <b>Short arm</b> | <b>Long arm</b> | <b>Total length</b> | <b>Relative length of chromosome (%)</b> | <b>Total length (Mb)</b> | <b>Relative length of sequence (%)</b> |
|-------------------|------------------|-----------------|---------------------|------------------------------------------|--------------------------|----------------------------------------|
| 1                 | 08.4 ± 1.2       | 13.8 ± 4.8      | 22.2 ± 5.1          | 8.4                                      | 37.1                     | 8.4                                    |
| 2                 | 10.6 ± 1.5       | 13.7 ± 3.8      | 24.3 ± 5.2          | 9.1                                      | 42.3                     | 9.6                                    |
| 3                 | 09.6 ± 4.2       | 13.9 ± 2.1      | 23.5 ± 6.3          | 8.8                                      | 30.5                     | 6.9                                    |
| 4                 | 05.7 ± 1.5       | 14.9 ± 0.9      | 20.5 ± 2.1          | 7.7                                      | 32.8                     | 7.5                                    |
| 5                 | 07.7 ± 1.3       | 12.5 ± 1.6      | 20.2 ± 2.3          | 7.6                                      | 32.3                     | 7.3                                    |
| 6                 | 15.2 ± 1.4       | 17.3 ± 1.9      | 32.5 ± 3.0          | 12.2                                     | 60                       | 13.6                                   |
| 7                 | 10.5 ± 0.5       | 13.3 ± 1.5      | 23.8 ± 1.5          | 9                                        | 40.7                     | 9.3                                    |
| 8                 | 12.2 ± 2.7       | 14.2 ± 2.5      | 26.4 ± 4.9          | 9.9                                      | 39                       | 8.9                                    |
| 9                 | 12.3 ± 0.8       | 13.0 ± 1.7      | 25.3 ± 2.5          | 9.5                                      | 51.8                     | 11.8                                   |
| 10                | 08.5 ± 2.9       | 16.1 ± 4.4      | 24.6 ± 6.9          | 9.2                                      | 32.7                     | 7.4                                    |
| 11                | 09.1 ± 2.7       | 13.6 ± 2.4      | 22.7 ± 4.9          | 8.5                                      | 40.6                     | 9.2                                    |

# Three pachytene were used for measurements.

# The relative length of chromosome (%) is in the percentage of the karyotype length.

# Total length (Mb) is the length of assembled sequences for each chromosome.

# The relative length of the sequence (%) is calculated using the assembled genome size.

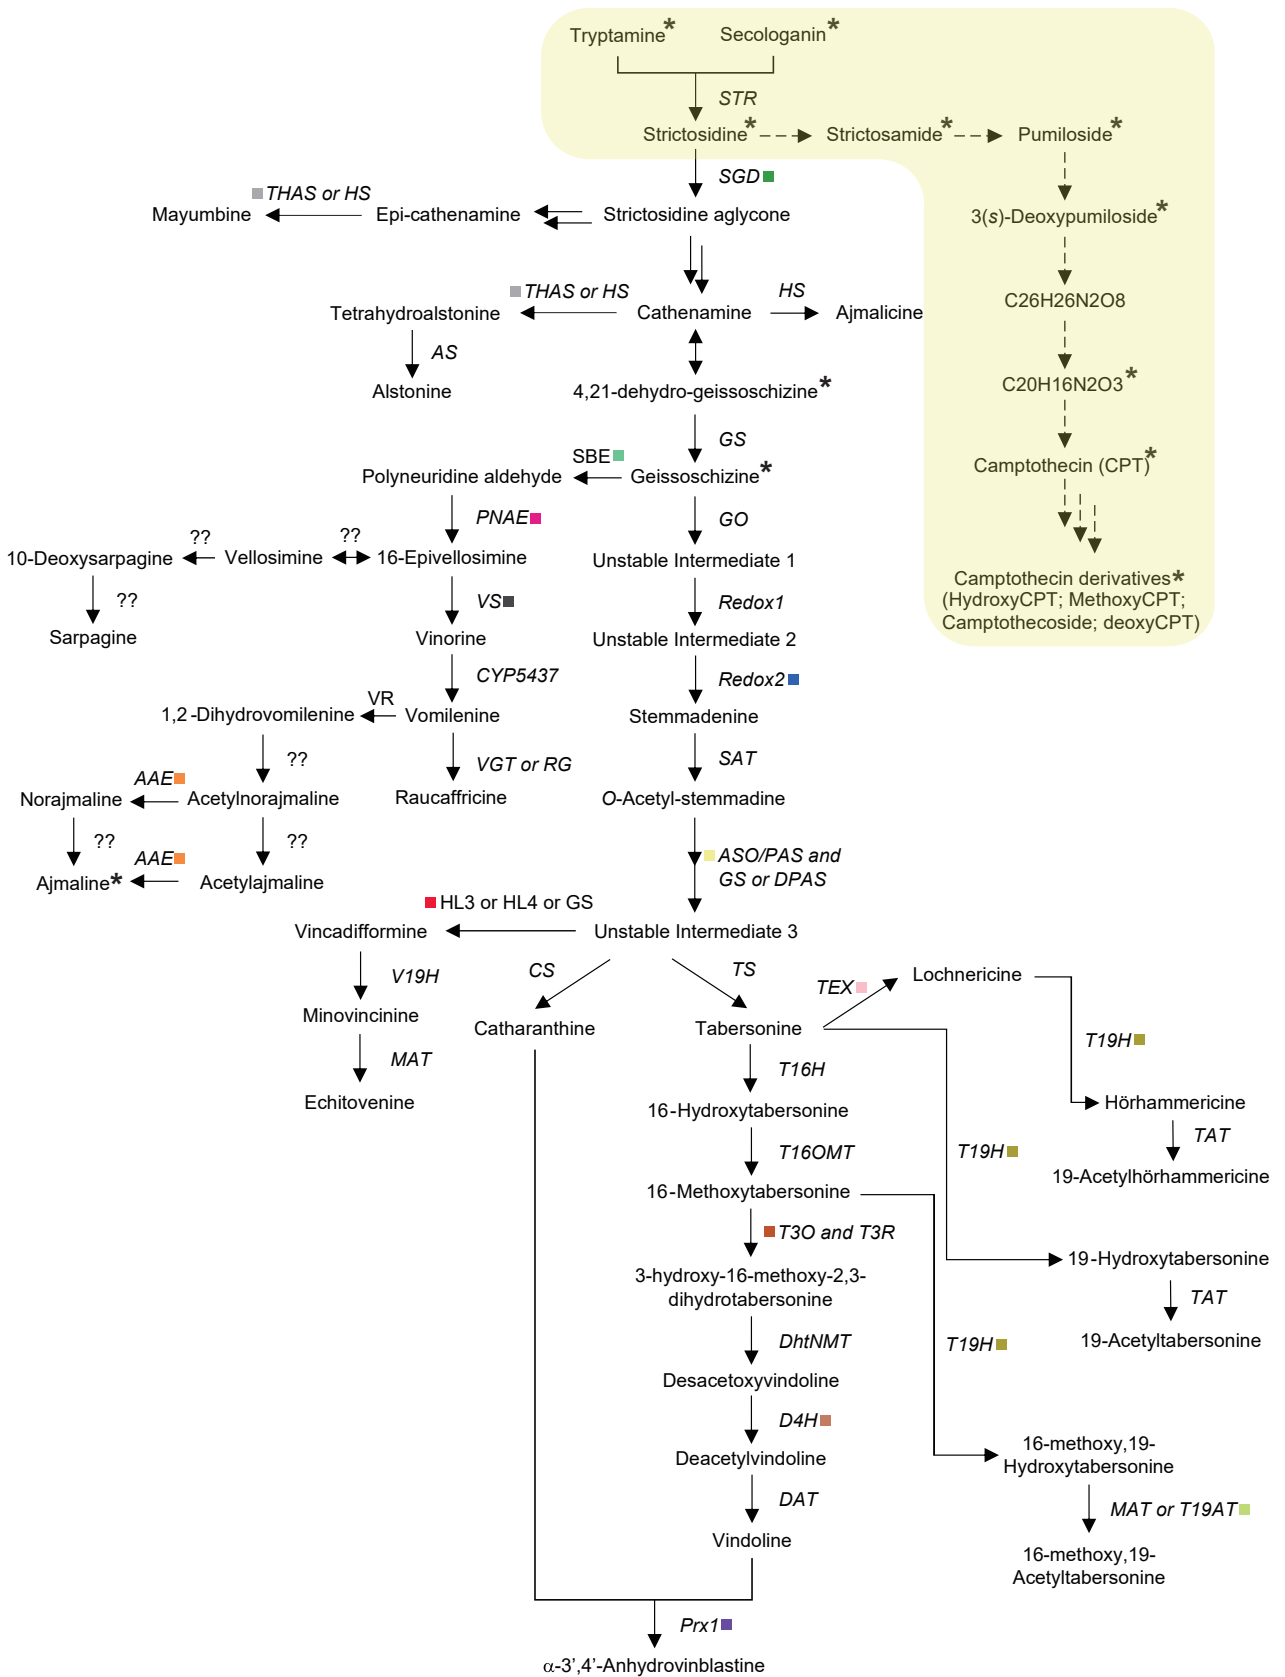

**Supplementary Fig. 1. Strictosidine derived monoterpene indole alkaloid (MIA) biosynthetic pathways.** Color codes represent specific enzymes assigned to *Ophiorrhiza pumila* genome. Metabolite names with \* were chemically assigned and identified in metabolite profiling datasets of *O. pumila* in this study. The yellow shaded branch pathway represents camptothecin biosynthesis pathway. Abbreviations- *STR*: strictosidine synthase; *SGD*: strictosidine- $\beta$ -D-glucosidase; *THAS*: tetrahydroalstonine synthase; *HS*: heteroyohimbine synthase; *AS*: alstonine synthase; *GS*: geissoschizine synthase; *SBE*: sarpagan bridge enzyme; *GO*: geissoschizine oxidase; *PNAE*: polyneuridine-aldehyde esterase; *VS*: vinorine synthase; *CYP5437*: vinorine hydroxylase; *VR*: vomilenine reductase; *SAT*: stemmadenine *O*-acetyltransferase; *RG*: raucaffricine- $\beta$ -D-glucosidase; *AAE*: acetylajmaline esterase; *ASO/PAS*: *O*-acetylstemmadenine oxidase; *DPAS*: dihydroprecondylocarpine synthase; *HL3*: hydrolase 3; *HL4*: hydrolase 4; *CS*: catharanthine synthase; *TS*: tabersonine synthase; *V19H*: vincadifformine-19-hydroxylase; *MAT*: minovincinine-*O*-acetyltransferase; *TEX*: tabersonine-6,7-epoxidase; *T16H*: tabersonine-16-hydroxylase; *T19H*: tabersonine-19-hydroxylase; *T16OMT*: tabersonine-16-*O*-methyltransferase; *T3O*: tabersonine-3-oxygenase; *T3R*: tabersonine-3-reductase; *TAT*: 19-hydroxytabersonine,19-*O*-acetyltransferase; *DhtNMT*: 3-hydroxy-16-methoxy-2,3-dihydrotabersonine-N-methyltransferase; *D4H*: deacetoxyvindoline-4-hydroxylase; *DAT*: deacetylvindoline-*O*-acetyltransferase; *T19AT*: tabersonine-19-hydroxy-*O*-acetyltransferase; *Prx1*: peroxidase 1

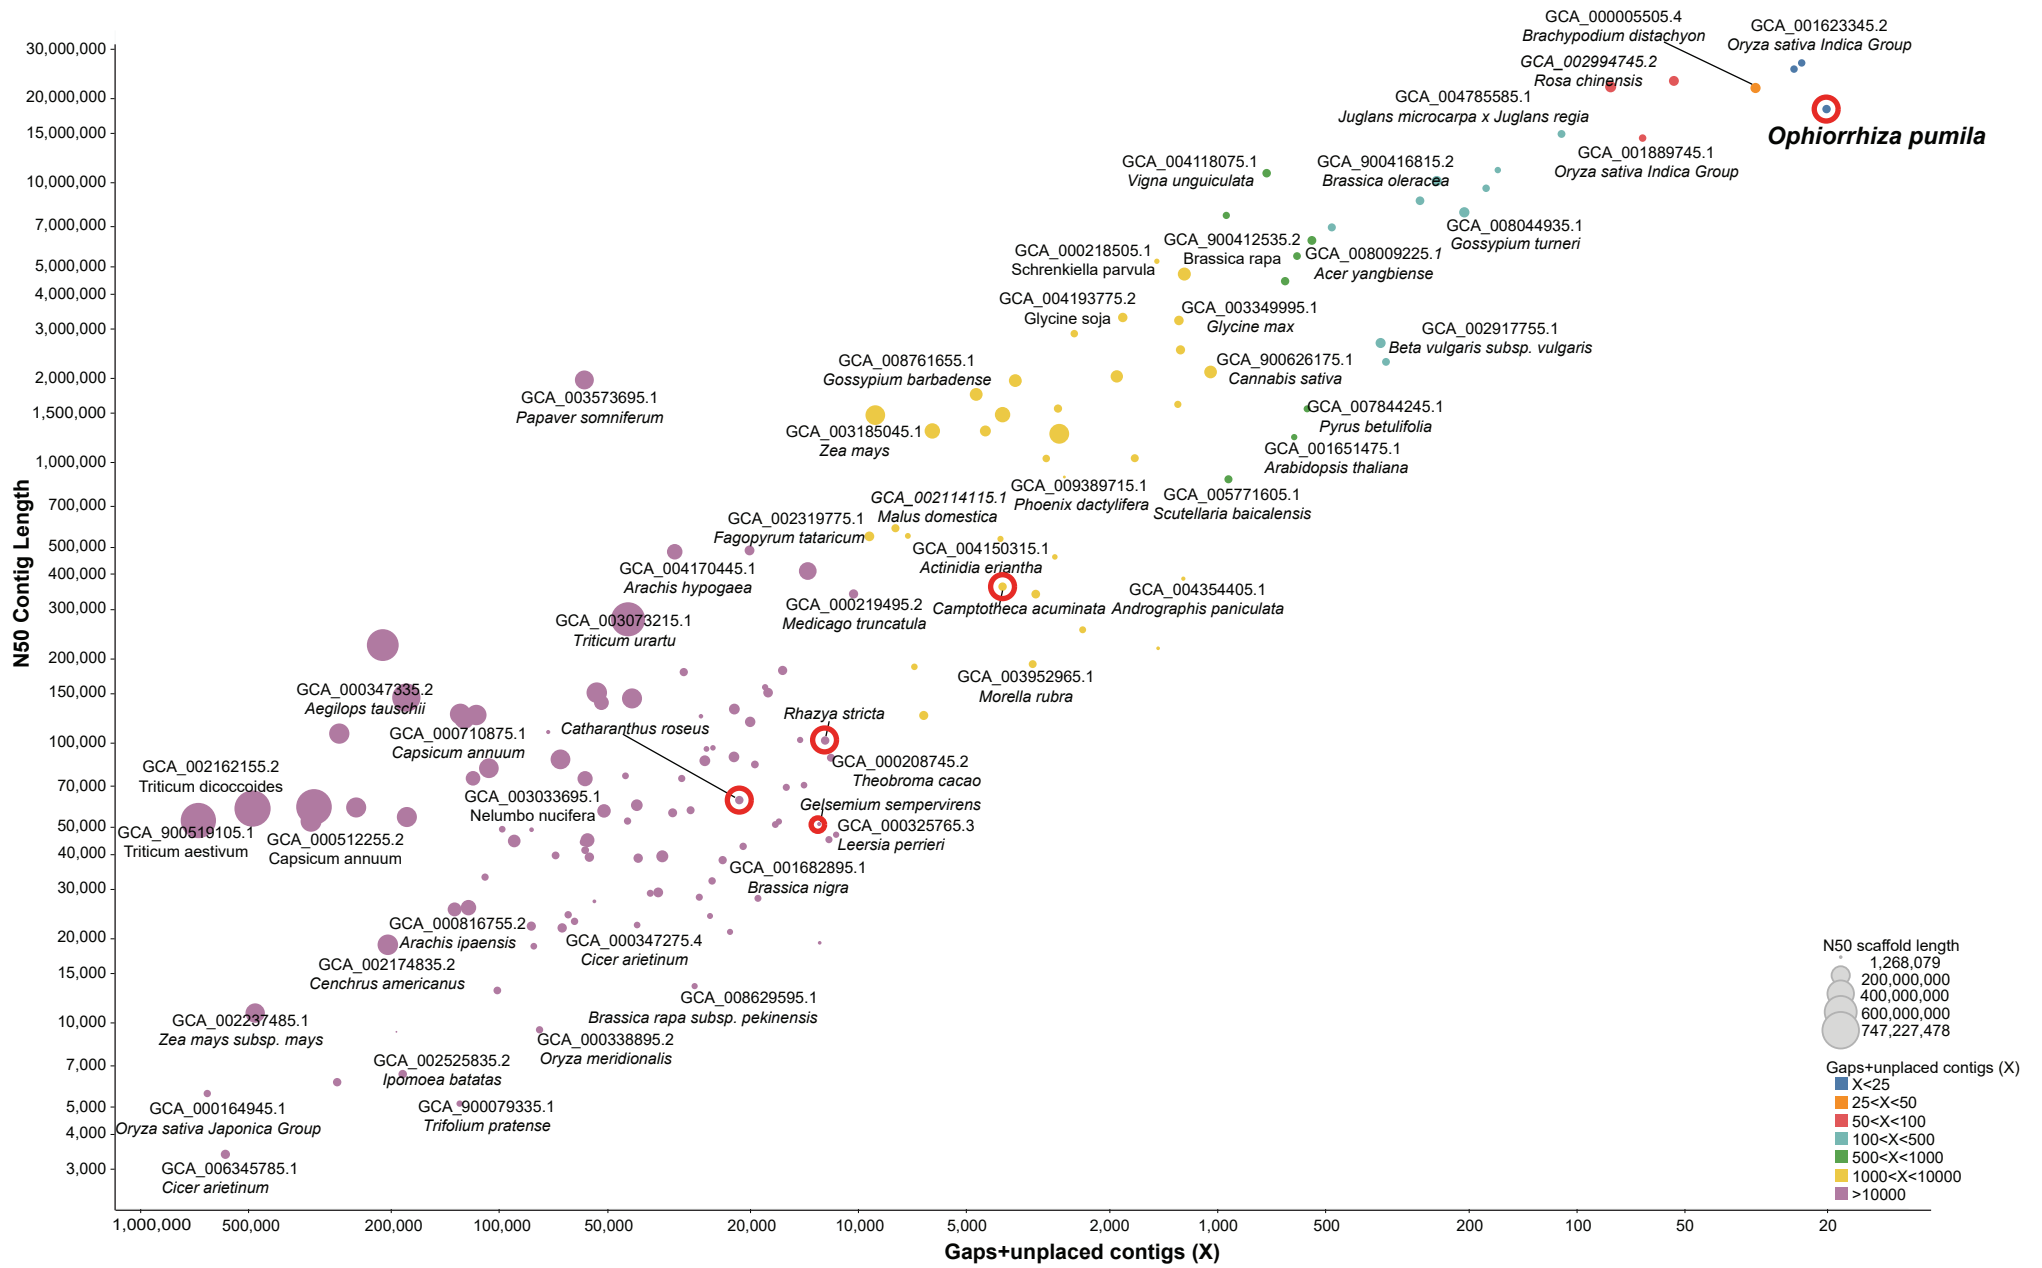

**Supplementary Fig. 2. Assembly statistics for chromosome-scale plant genome assemblies deposited at the NCBI genome database.** Chromosome-scale plant genome assemblies being published and deposited in NCBI genome database are included here, while *Ophiorrhiza pumila* genome was assembled in this study. All publicly available genome stats of monoterpene indole alkaloids producing plants were highlighted through red circle.

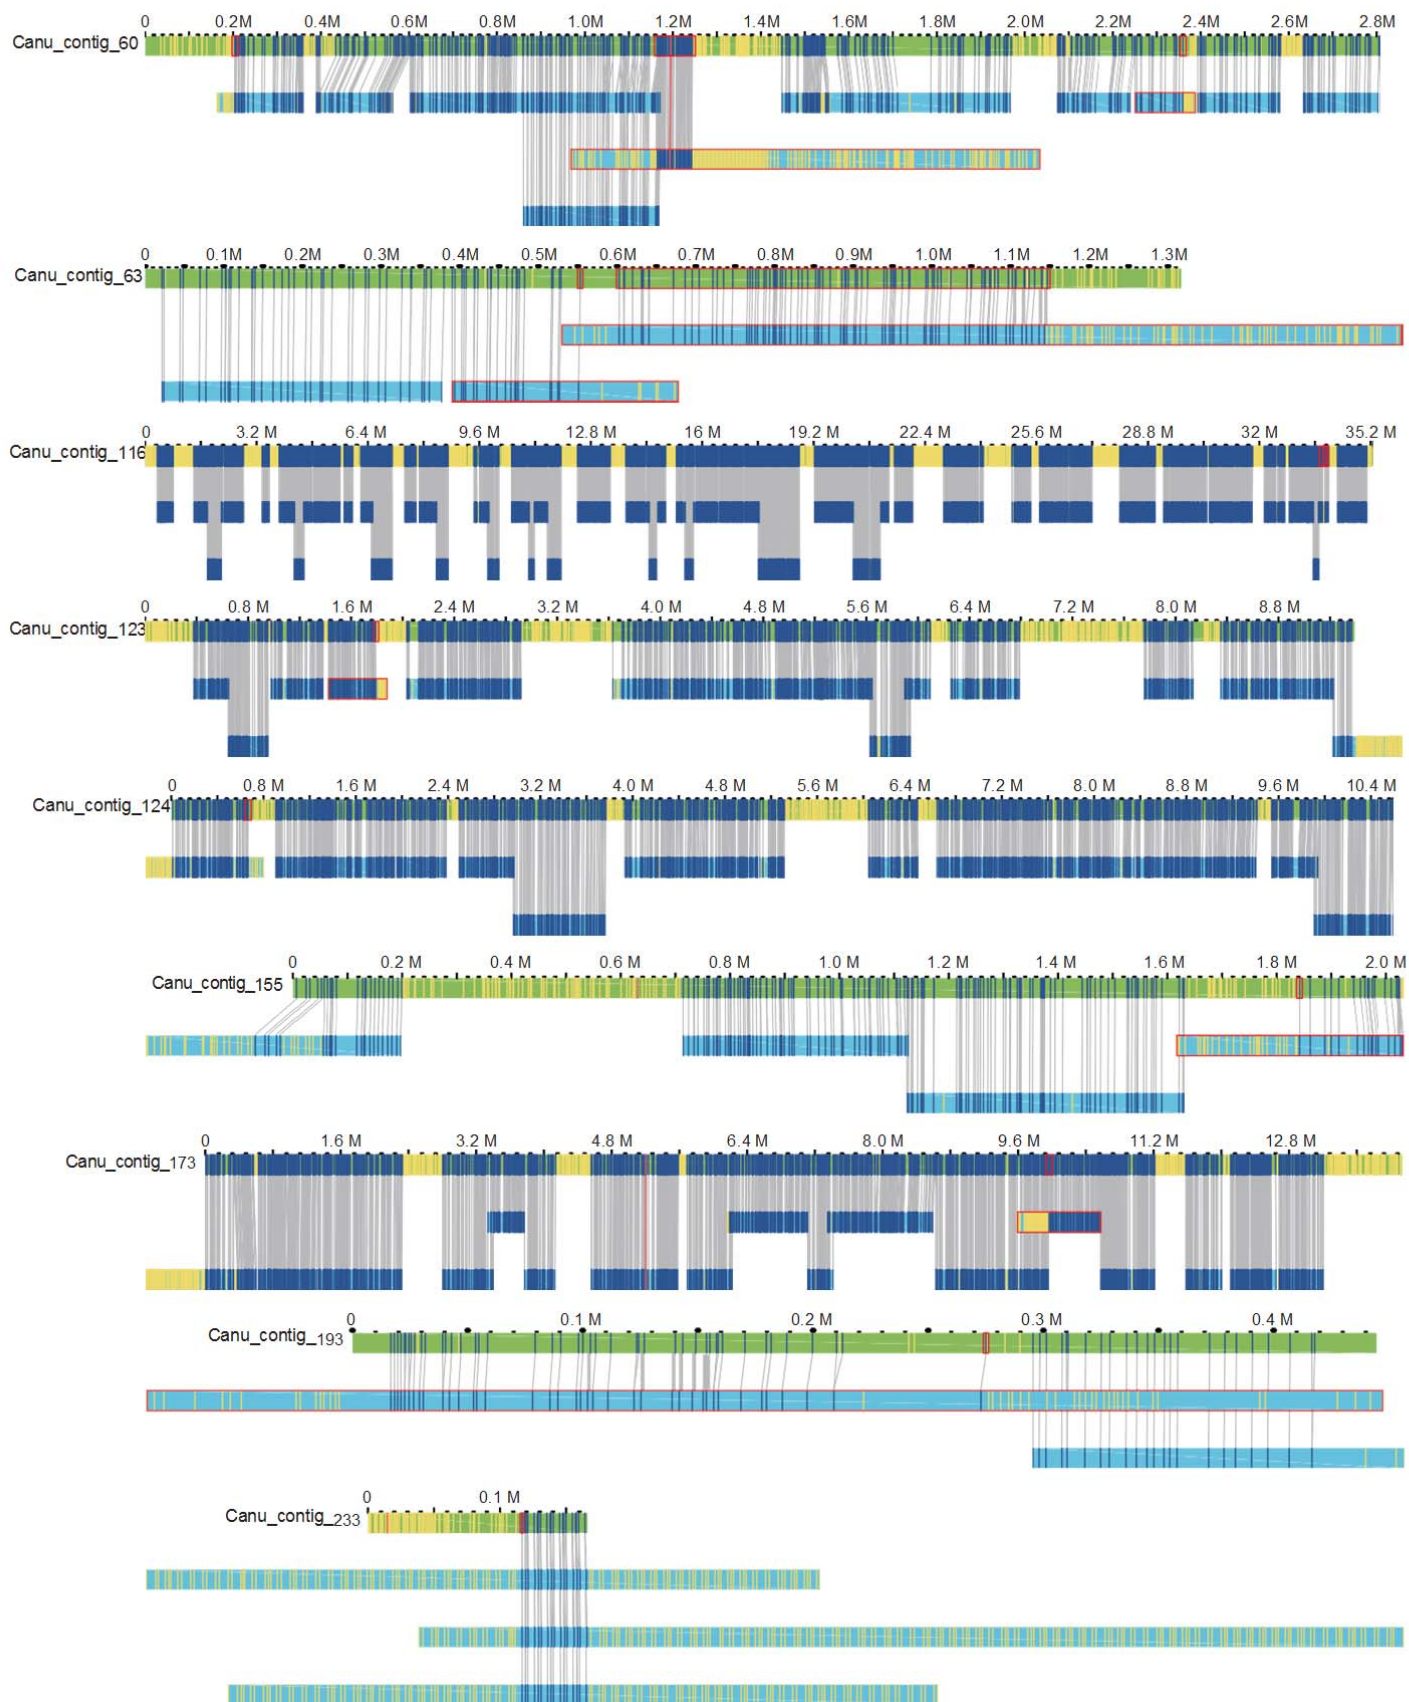

**Supplementary Fig. 3. Contig-level genome assembly validation using Bionano de novo genome assembly for *Ophiorrhiza* genome.** The Canu PacBio contigs are shown as green bar, Bionano de novo contigs are shown as light blue (turquoise) bar. The regions, on both of the NGS and Bionano assemblies, with consensus are shown as dark blue shades on the bar connected through grey lines, the regions with no support either for NGS assembly or Bionano assembly are shown through yellow lines, and the regions which has conflicts based on NGS assembly and Bionano alignments are shown through red box.

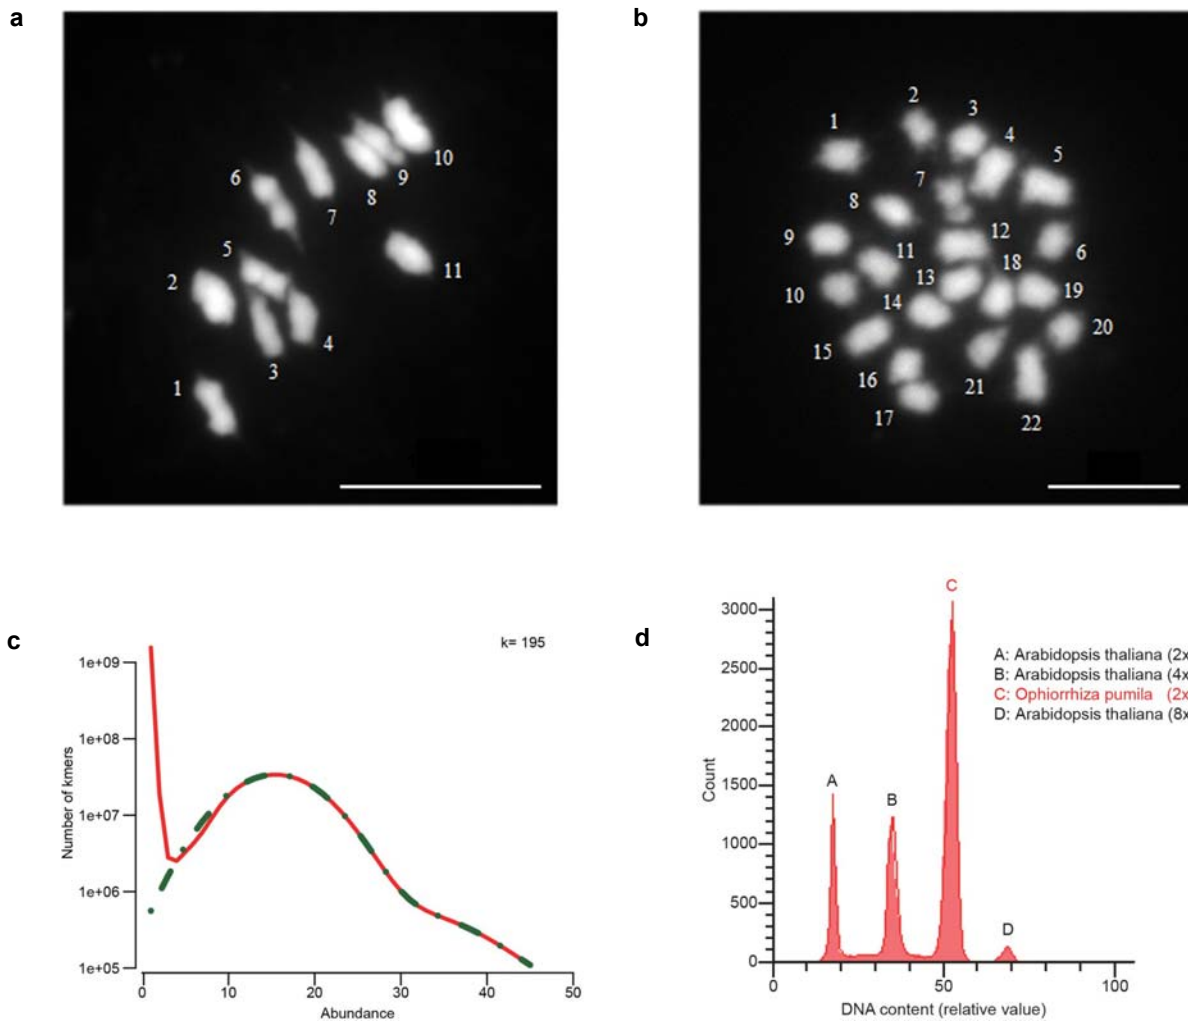

**Supplementary Fig. 4. *Ophiorrhiza pumila* karyotype and genome size estimation. (a)** Meiotic metaphase I chromosomes of *O. pumila*. The chromosomes form 11 bivalents. The scale bar corresponds to 10  $\mu\text{m}$ . **(b)** Mitotic chromosomes of *O. pumila*, representing a diploid genome with  $2n = 22$  chromosomes. The scale bar corresponds to 5  $\mu\text{m}$ . The karyotyping was performed twice, and for each experiment, at least 10 metaphase plates were analyzed. **(c)** Genome size estimation of *O. pumila* genome using KmerGenie software. Genome size at kmer-195 was estimated as 440 Mb. **(d)** Flow cytometer-based genome estimation, with genome size predicted as 420 Mb. Here count refers to the number of nuclei.



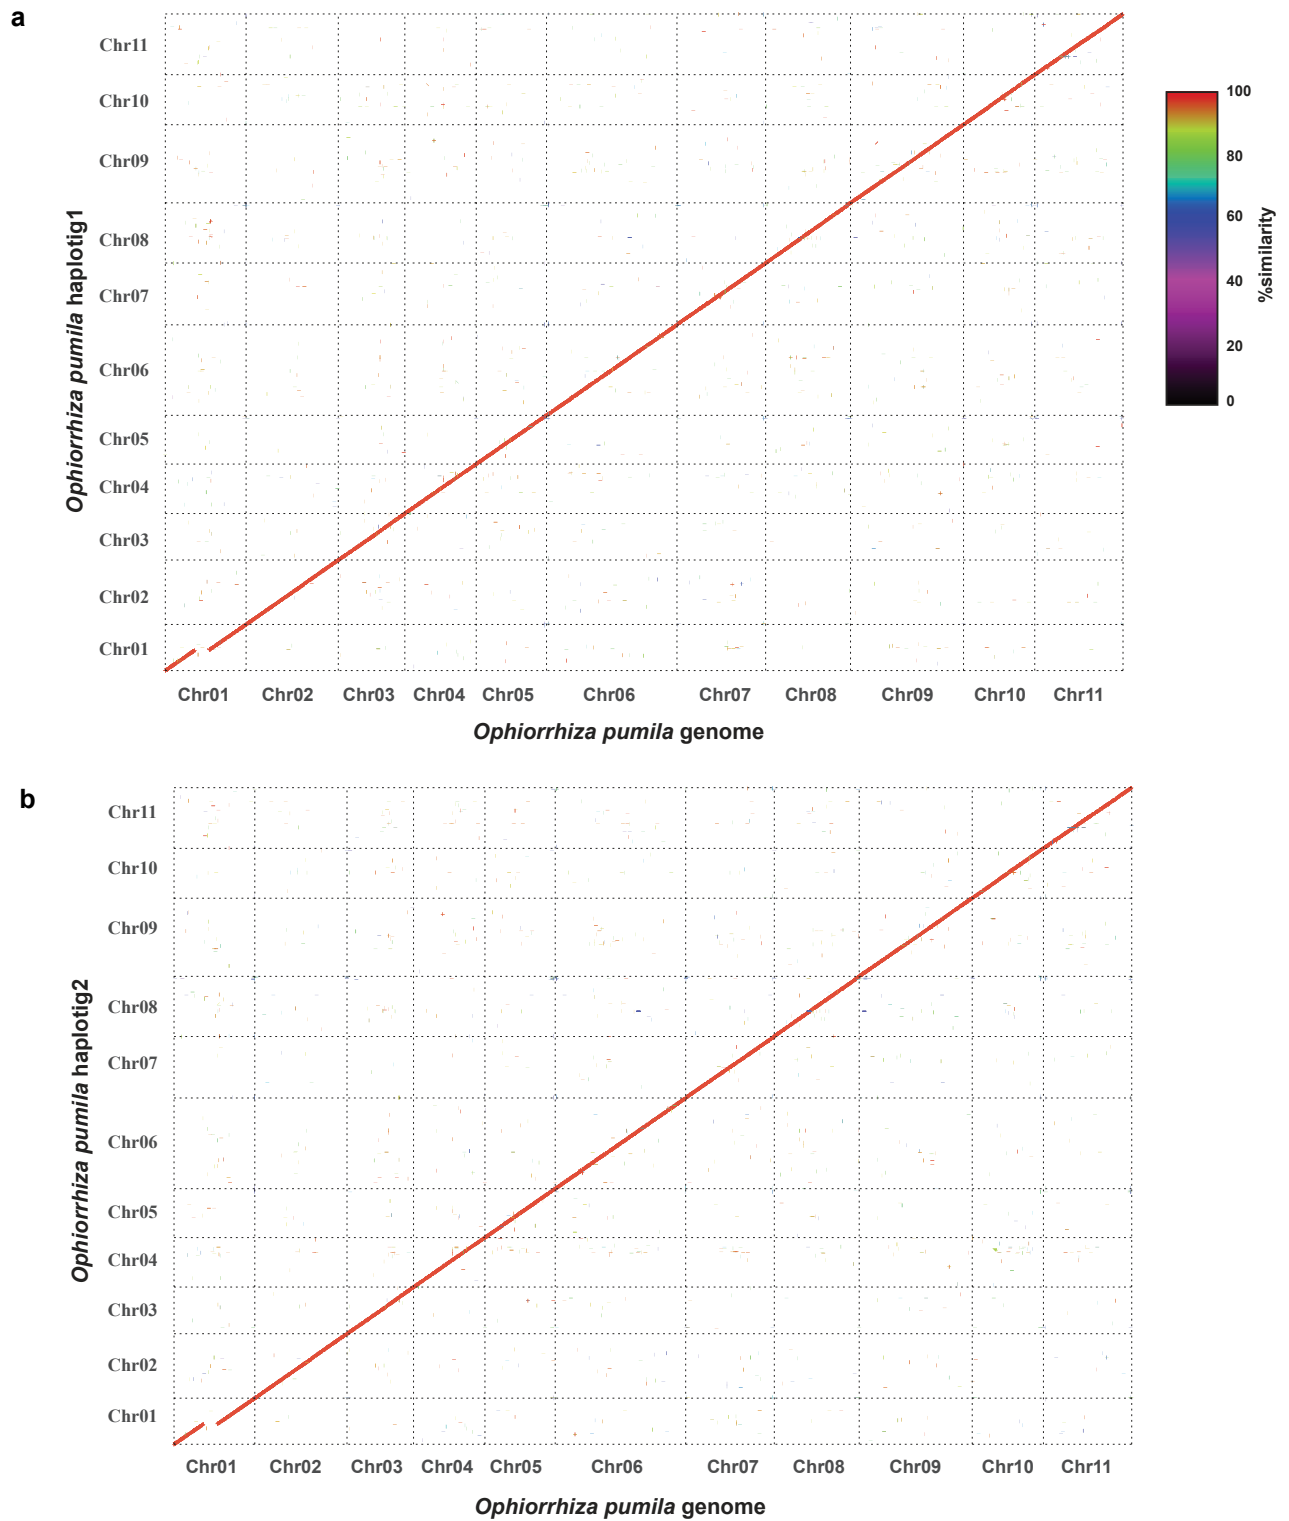

**Supplementary Fig. 5. Alignment of phased and reference genome assemblies of *Ophiorrhiza pumila*.** Phased genome assemblies of *O. pumila*, haplotig1 (a) and haplotig2 (b), were aligned to the reference genome using PROmer from MUMmer package, and the alignments are represented by dot-plots.

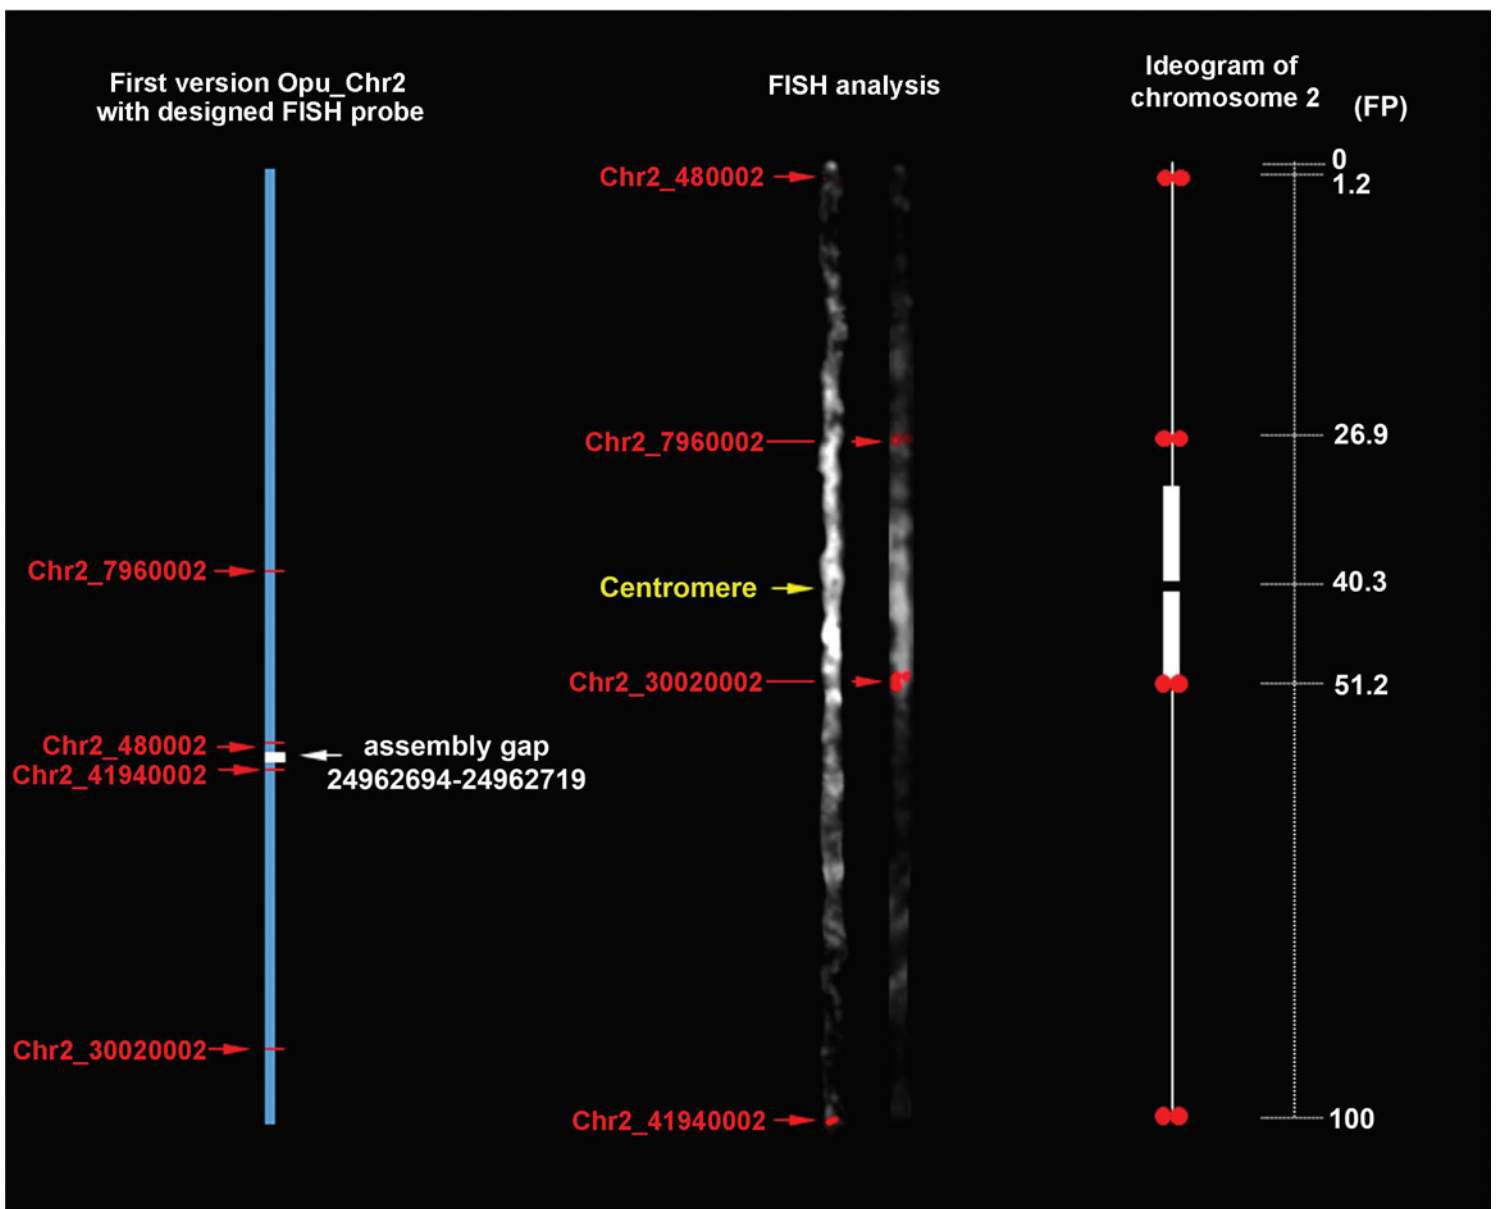

**Supplementary Fig. 6. Fluorescence *in situ* hybridization (FISH) analysis for chromosome 2 of *Ophiorrhiza pumila*.** The four probes (red text) correspond to the four different sites on chromosome 2 of *O. pumila*. While probes on the same chromosome arms were consistent with the expected assigned scaffolds, their positions at the assembly gap provided evidence of misalignment. The scaffolds at the assembly gap of chromosome 2 were re-oriented in the final reference genome of *O. pumila*. The experiment was performed twice, and for each experiment, we validated chromosomes for at least 10 slides.

**a**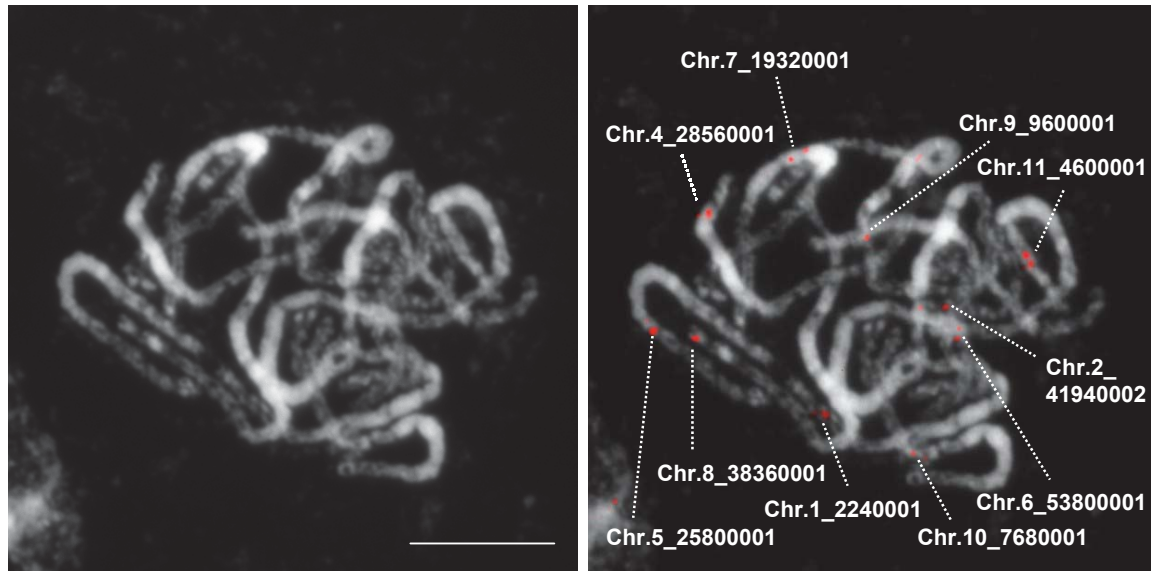**b**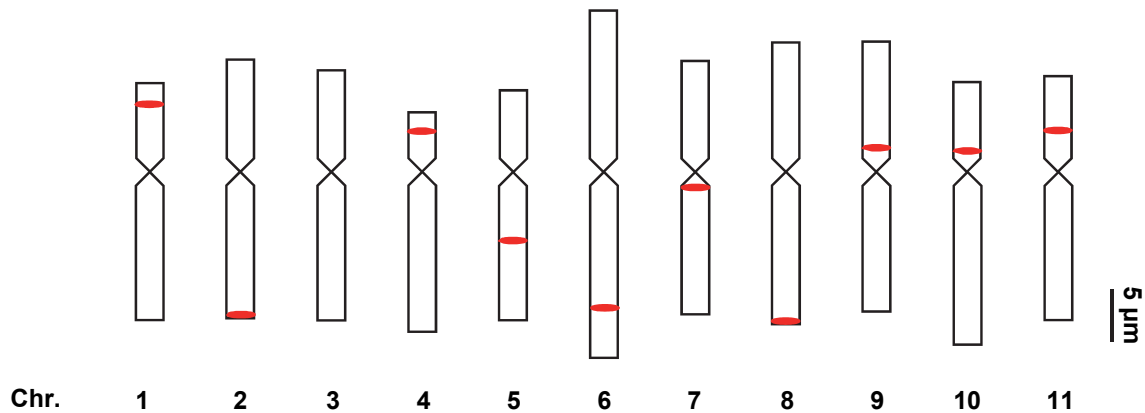

**Supplementary Fig. 7. Identification of *Ophiorrhiza pumila* chromosomes and its karyotype.** (a) DAPI stained *O. pumila* pachytene chromosomes and Fluorescence *in situ* hybridization (FISH) analysis-based identifications of the chromosomes. The scale bar corresponds to 5µm. (b) Ideogram of the *O. pumila* chromosome, are drawn based on Supplementary Table 1 results. Red bars indicate the position of FISH signals used in the identification of respective chromosomes, as shown in (a). The experiment was repeated twice, and for each experiment, at least 10 chromosome slides were analyzed.

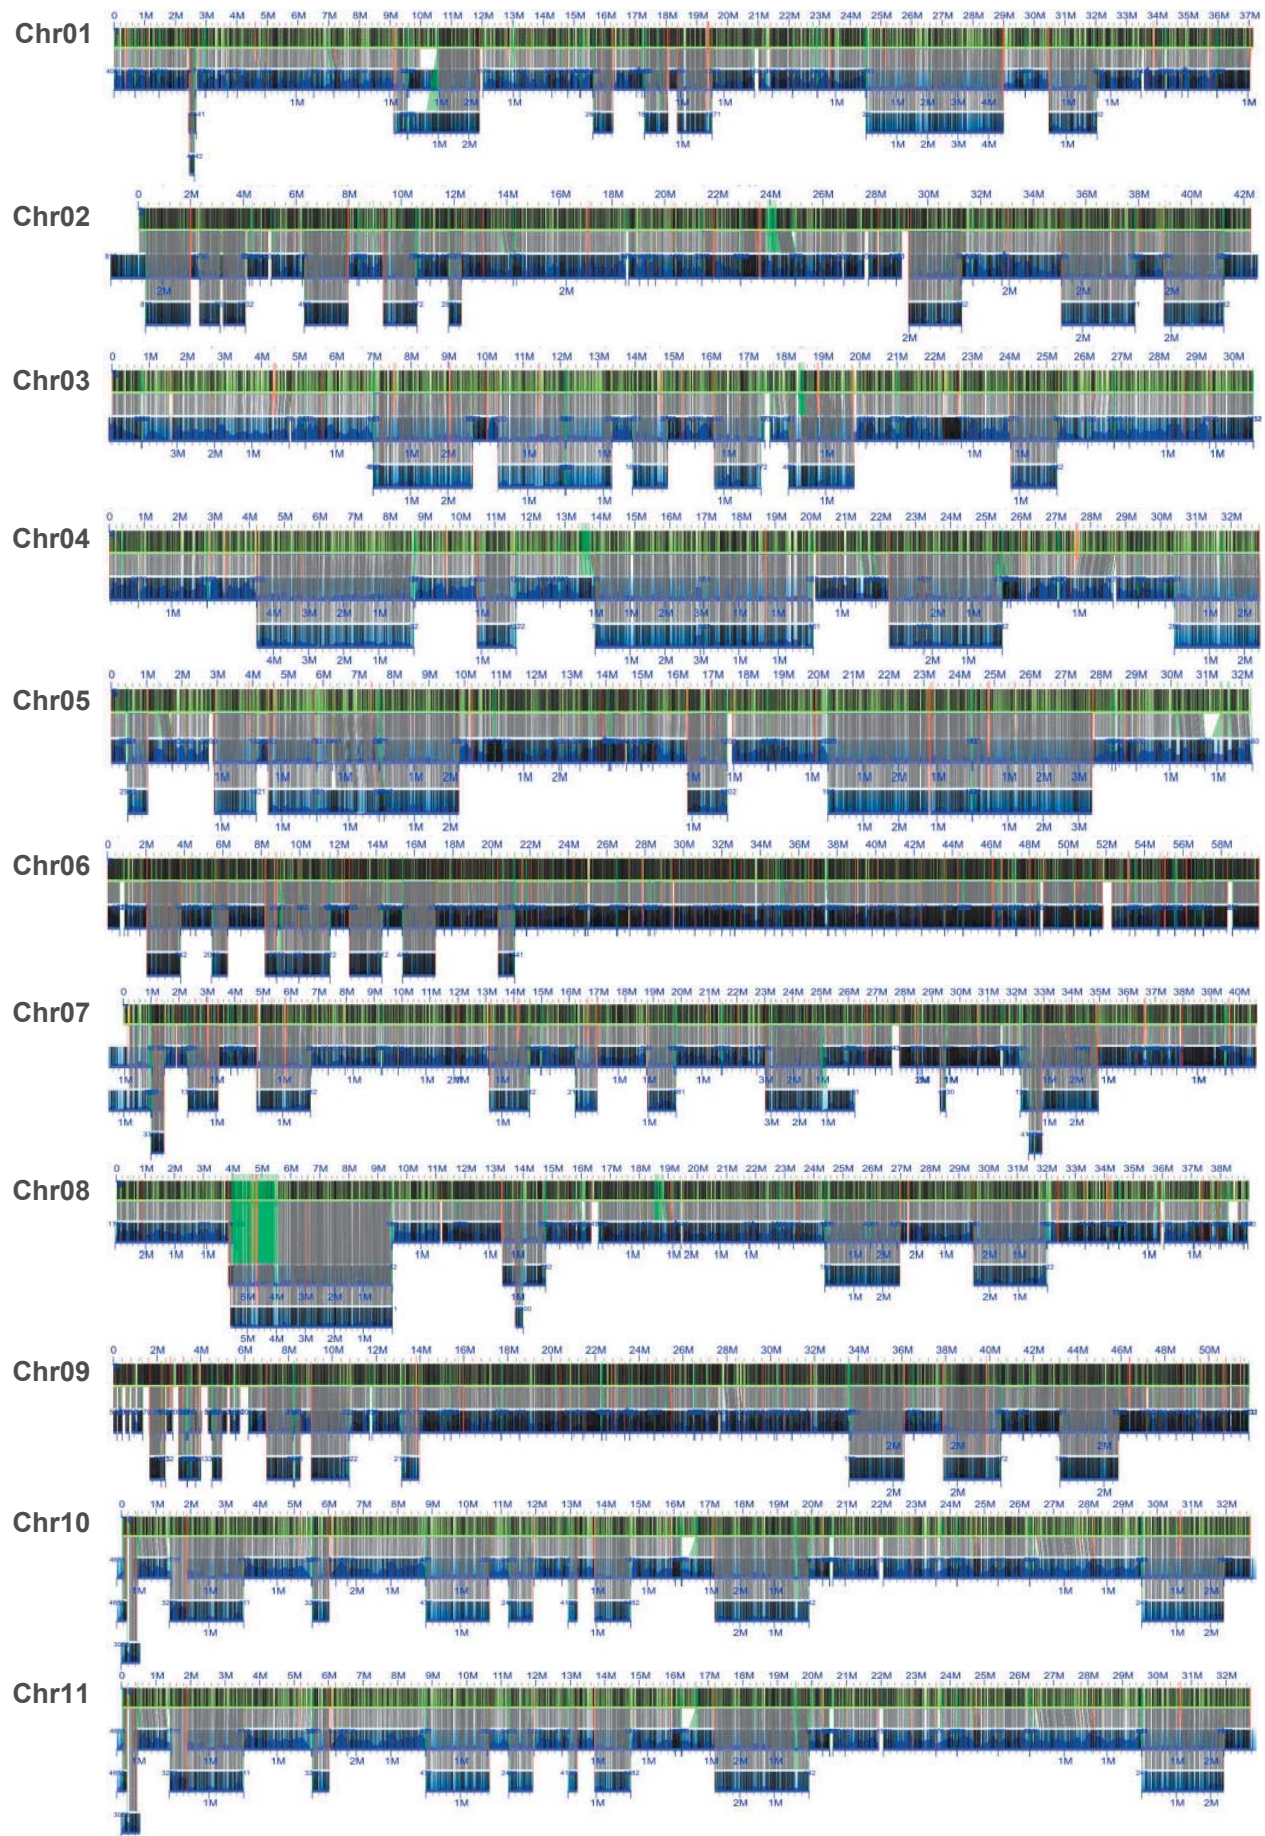

**Supplementary Fig. 8. The *Ophiorrhiza pumila* reference genome assembly validation using Bionano de novo genome assembly as orthogonal evidence.** All 11 chromosomes were supported by Bionano de novo assembly (blue color bars), with green and red color shades between these two assembly alignments representing regions of insertions or deletions, respectively.

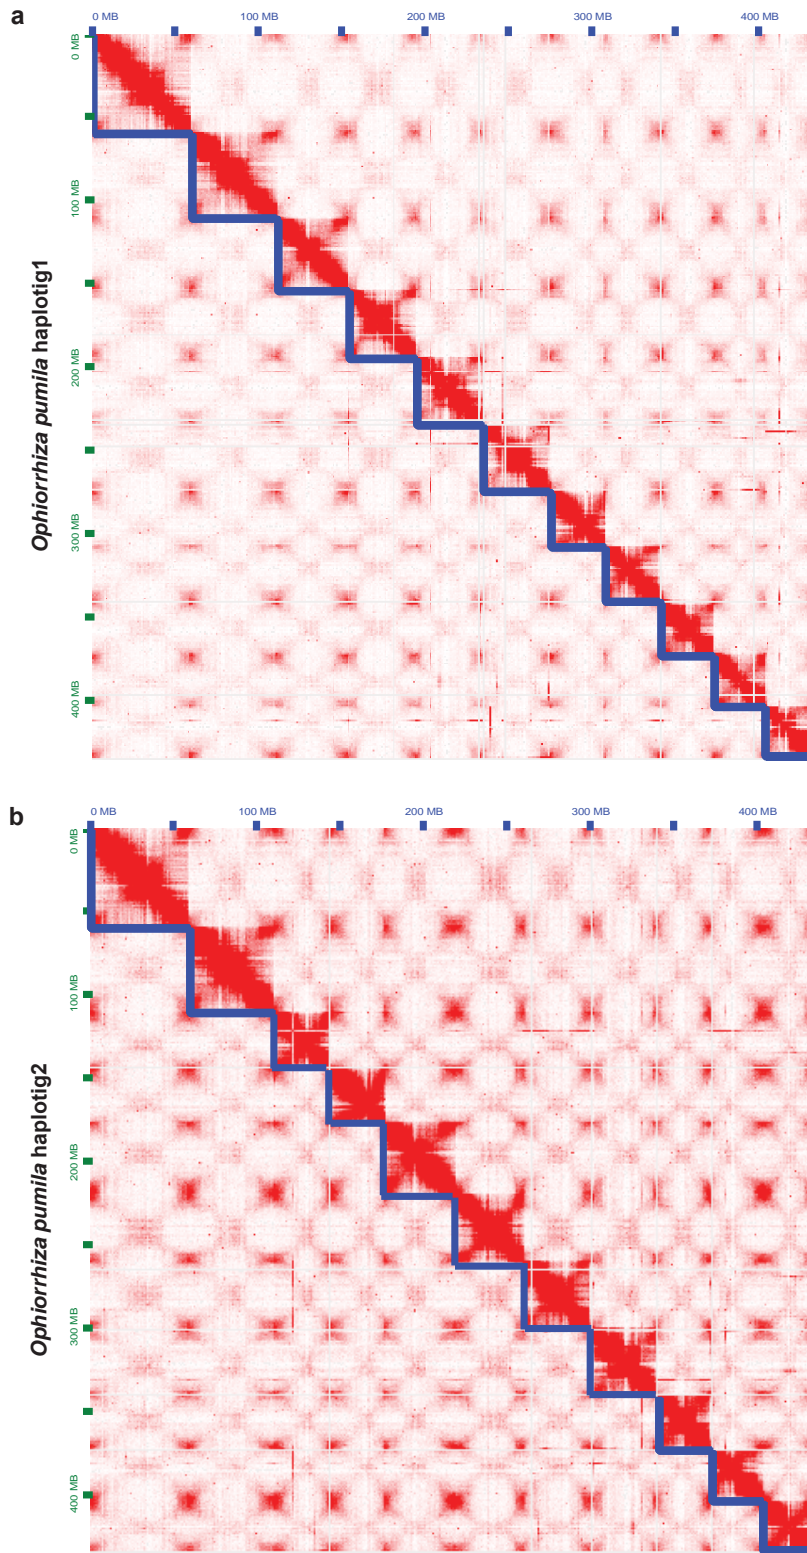

**Supplementary Fig. 9. Hi-C contact map representing chromosome-scale phased genomes of *Ophiorrhiza pumila*.** Hi-C contact matrix visualization for the *O. pumila* phased genomes, haplotig1 (a) and haplotig2 (b). The pixel intensity represents the count of Hi-C links at 150 Kb size-windows on the chromosomes on a logarithmic scale. Darker red color indicates higher contact probability, while white space represents no or fewer contacts. The blue lines separate chromosomes for each phased genome.

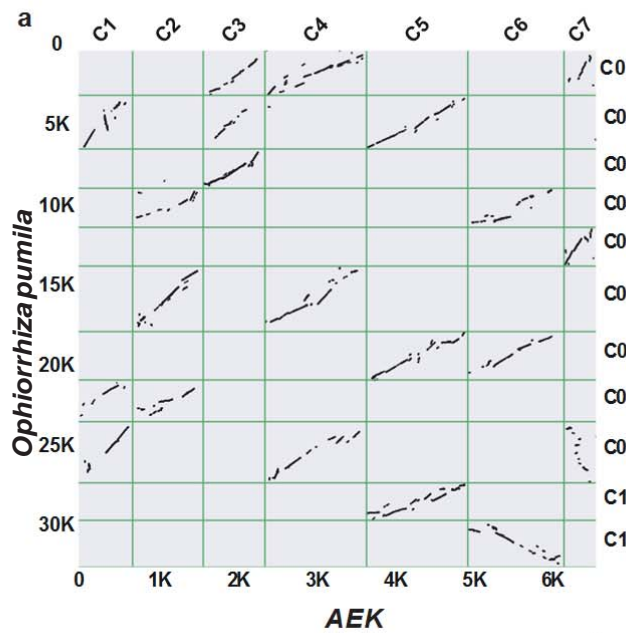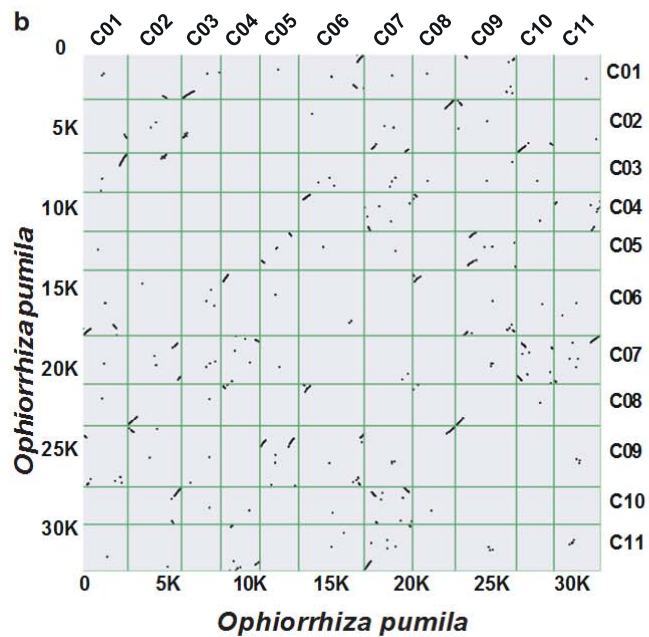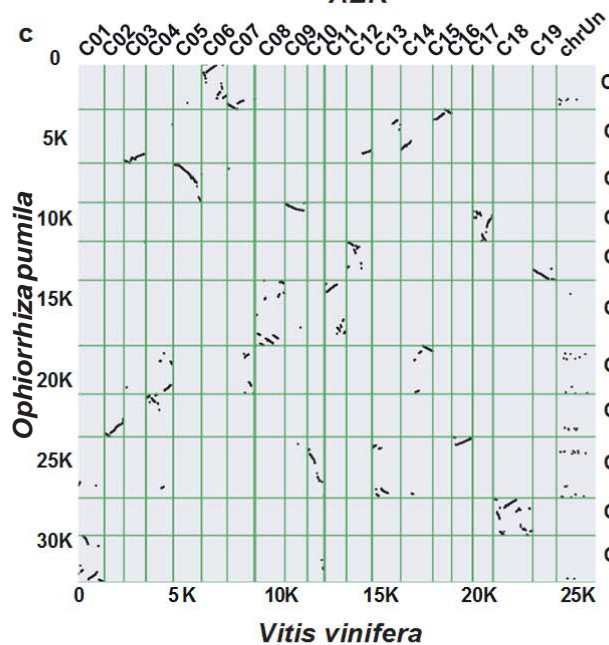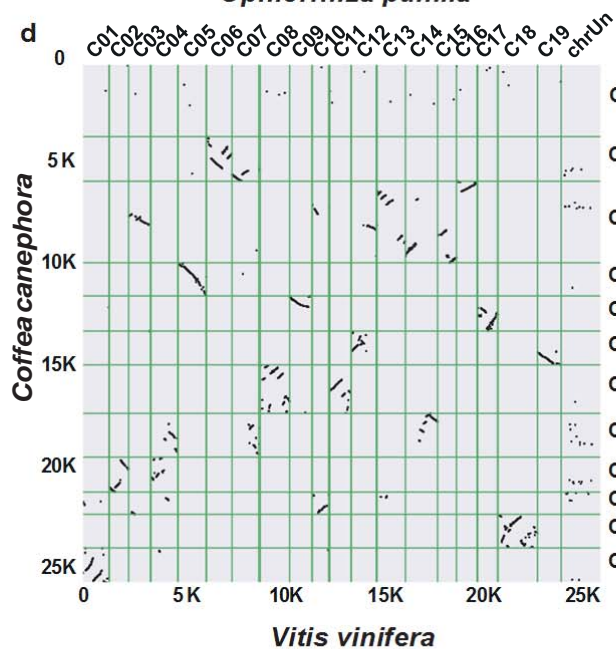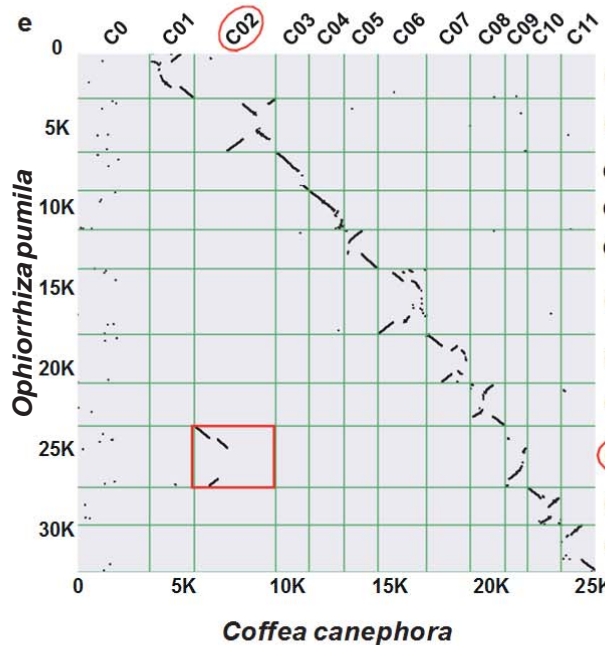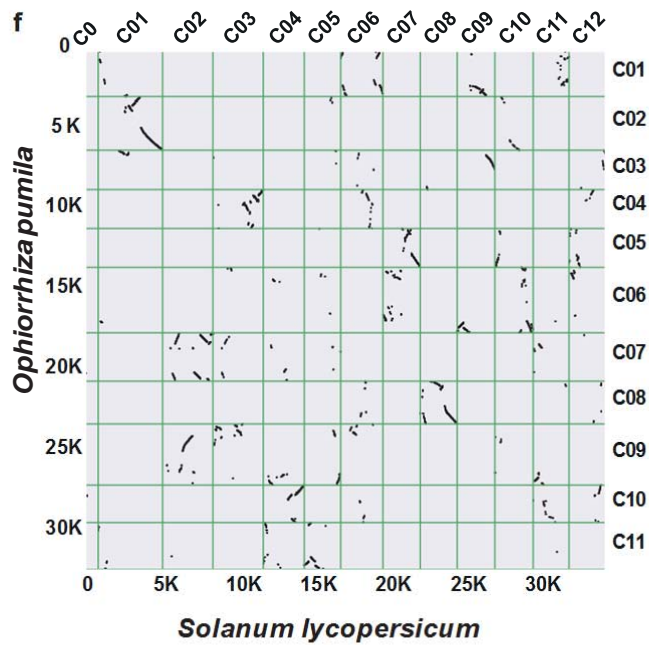

**Supplementary Fig. 10. Synteny dot-plot for *Ophiorrhiza pumila* genome within, and with selected plant species including ancestral eudicot karyotype (AEK).** (a) Dot-plot based synteny visualization showed a near-perfect 1:3 synteny relationship between AEK and *O. pumila* genome. Synteny dot-plot between (b) *O. pumila* - *O. pumila*, (c) *O. pumila* - *Vitis vinifera*, (d) *Coffea canephora* - *V. vinifera*, (e) *O. pumila* - *C. canephora*, and (f) *O. pumila* - *Solanum lycopersicum* showed conserved gene blocks within these species. Synteny dot-plot between *O. pumila* and *C. canephora* showed a 1:1 synteny depth with an interesting interaction between chromosome 9 of the *Ophiorrhiza* genome and chromosome 2 of coffee genome, as shown in the red box.

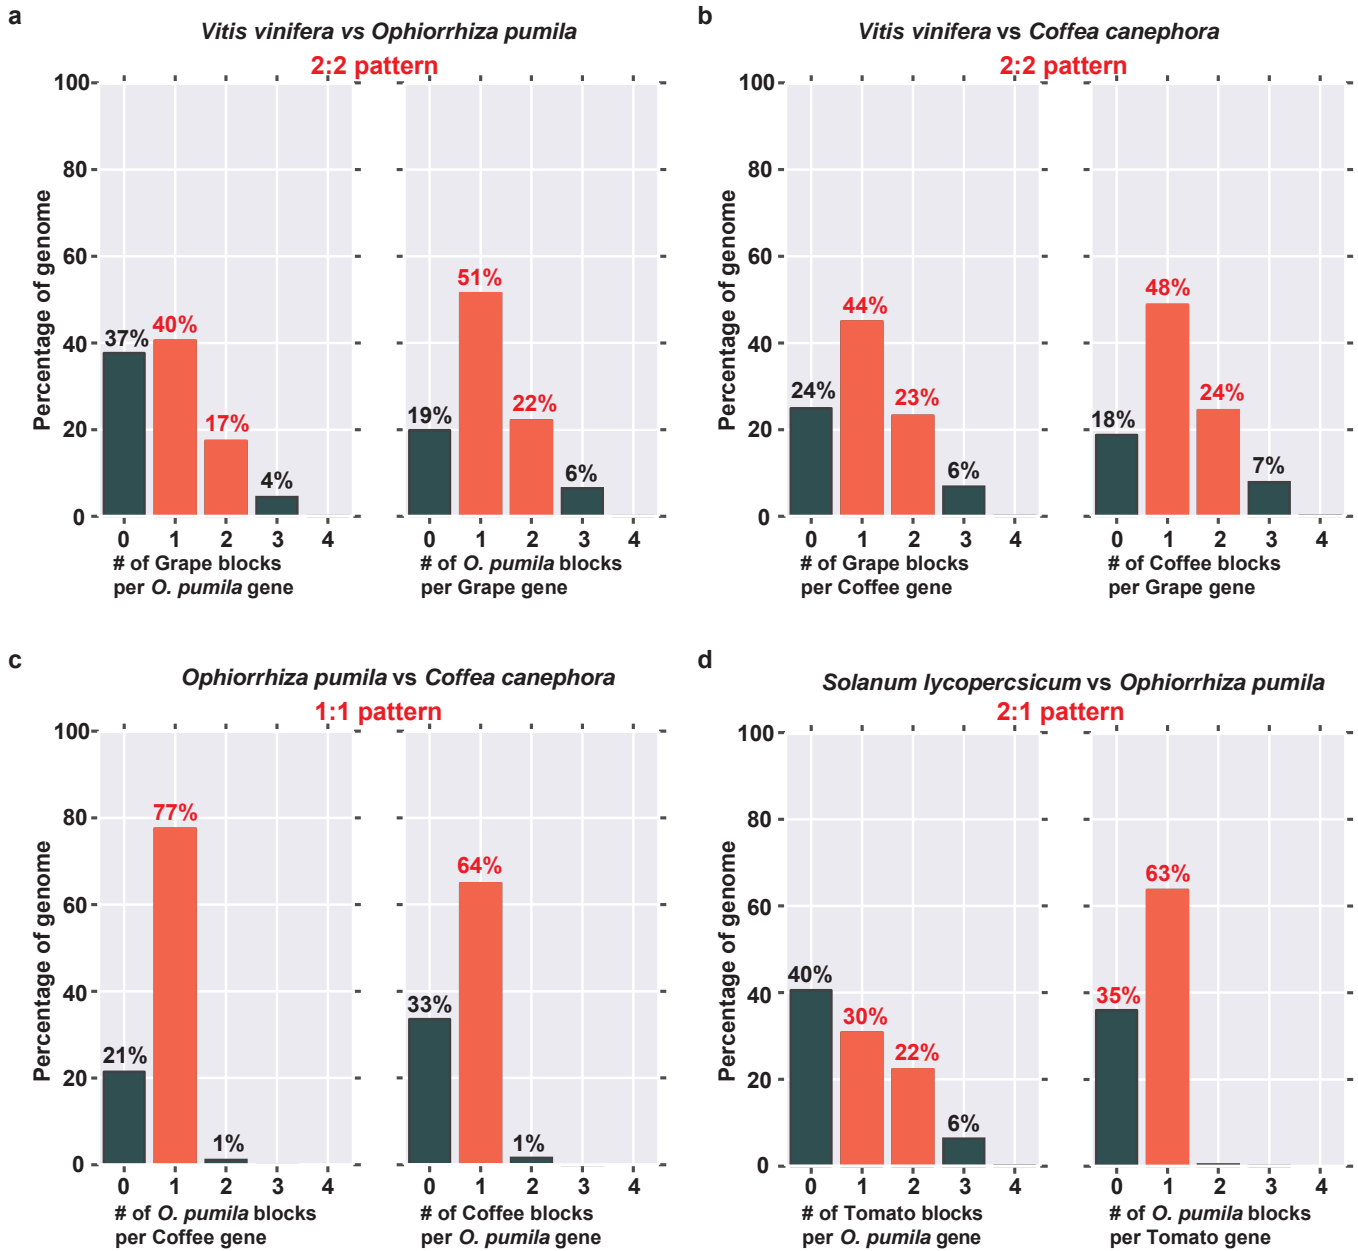

**Supplementary Fig. 11. Estimated synteny depths between selected plant species.** Synteny depths for *Vitis vinifera* with *Ophiorrhiza pumila* (a) and *Coffea canephora* (b) was determined as 2:2, while synteny depths for *O. pumila* with *C. canephora* (c) and *Solanum lycopersicum* (d) as 1:1 and 2:1, respectively.



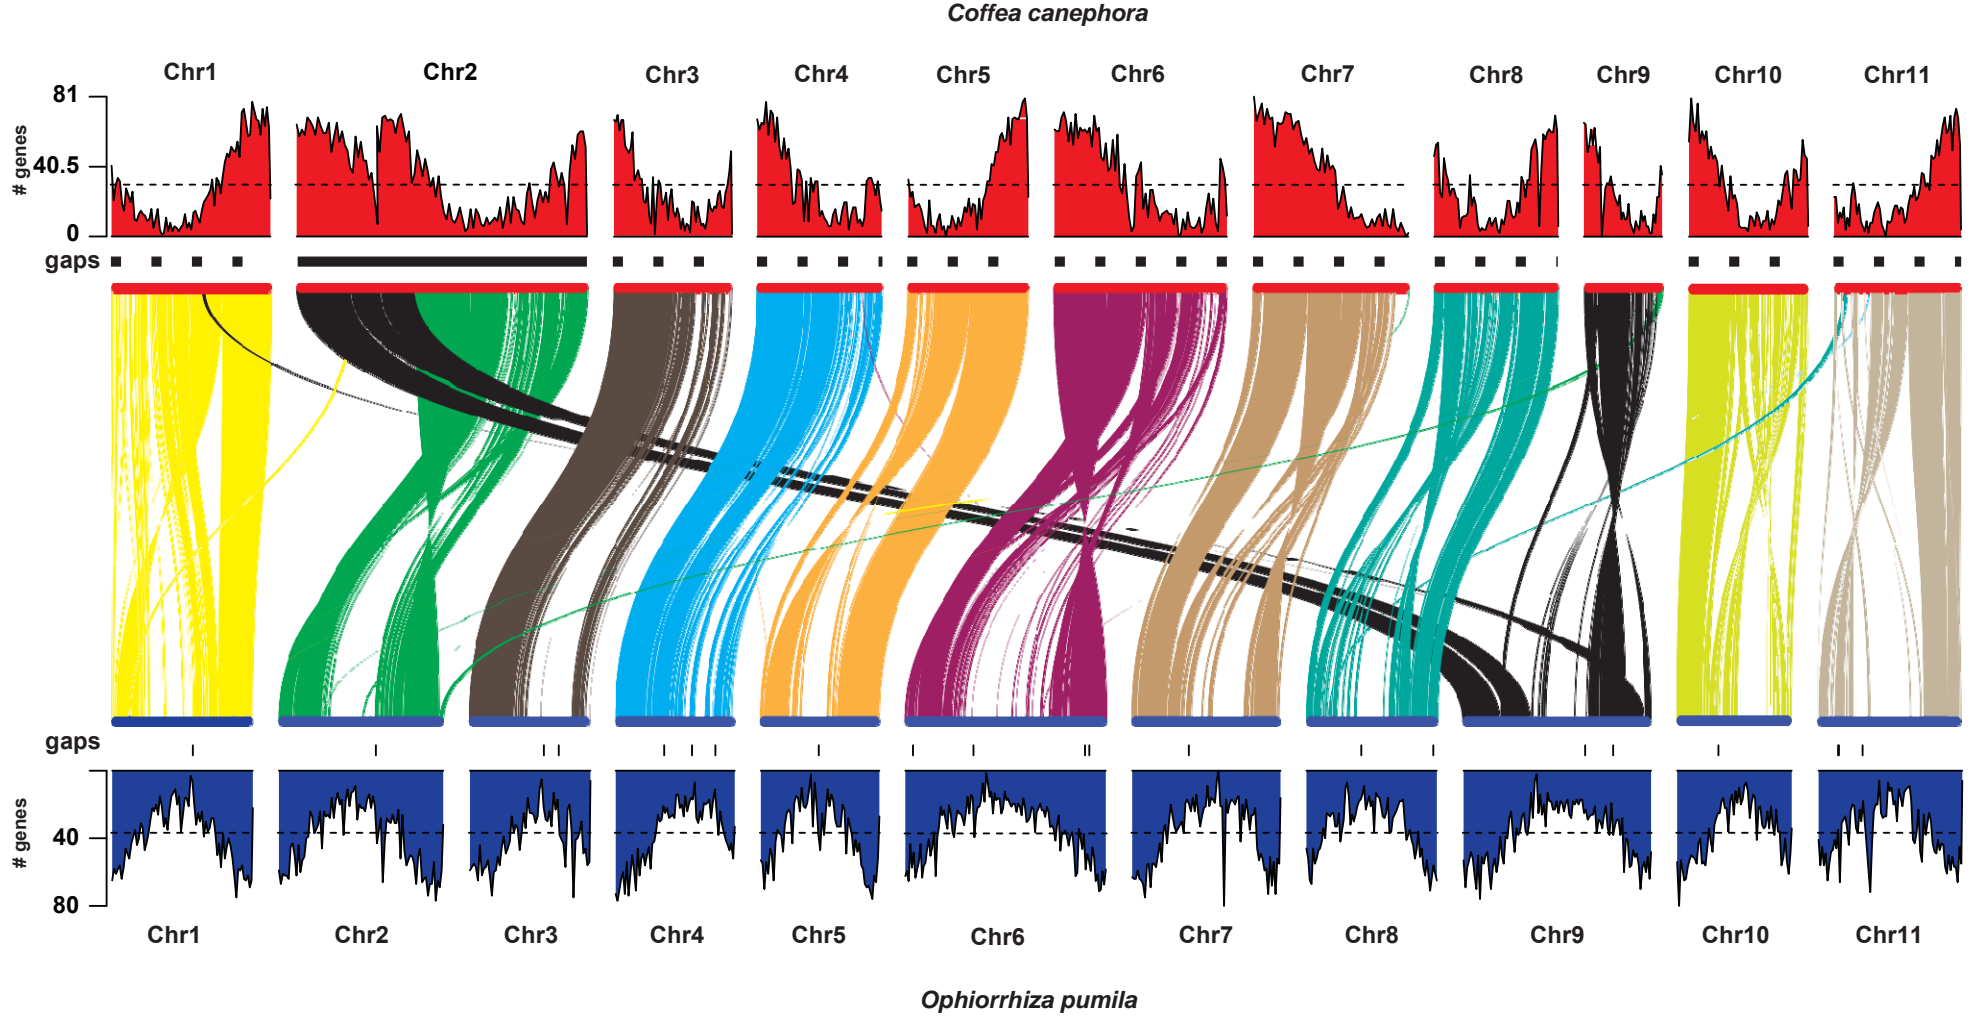

**Supplementary Fig. 12. Macrosynteny analysis for *Ophiorrhiza pumila* and *Coffea canephora* genome assemblies.** Karyotypes with synteny associations, gene density distribution, and assembly gaps for *Ophiorrhiza* and coffee genome are represented. The color of synteny relationships are based on associations with *Ophiorrhiza* chromosomes.

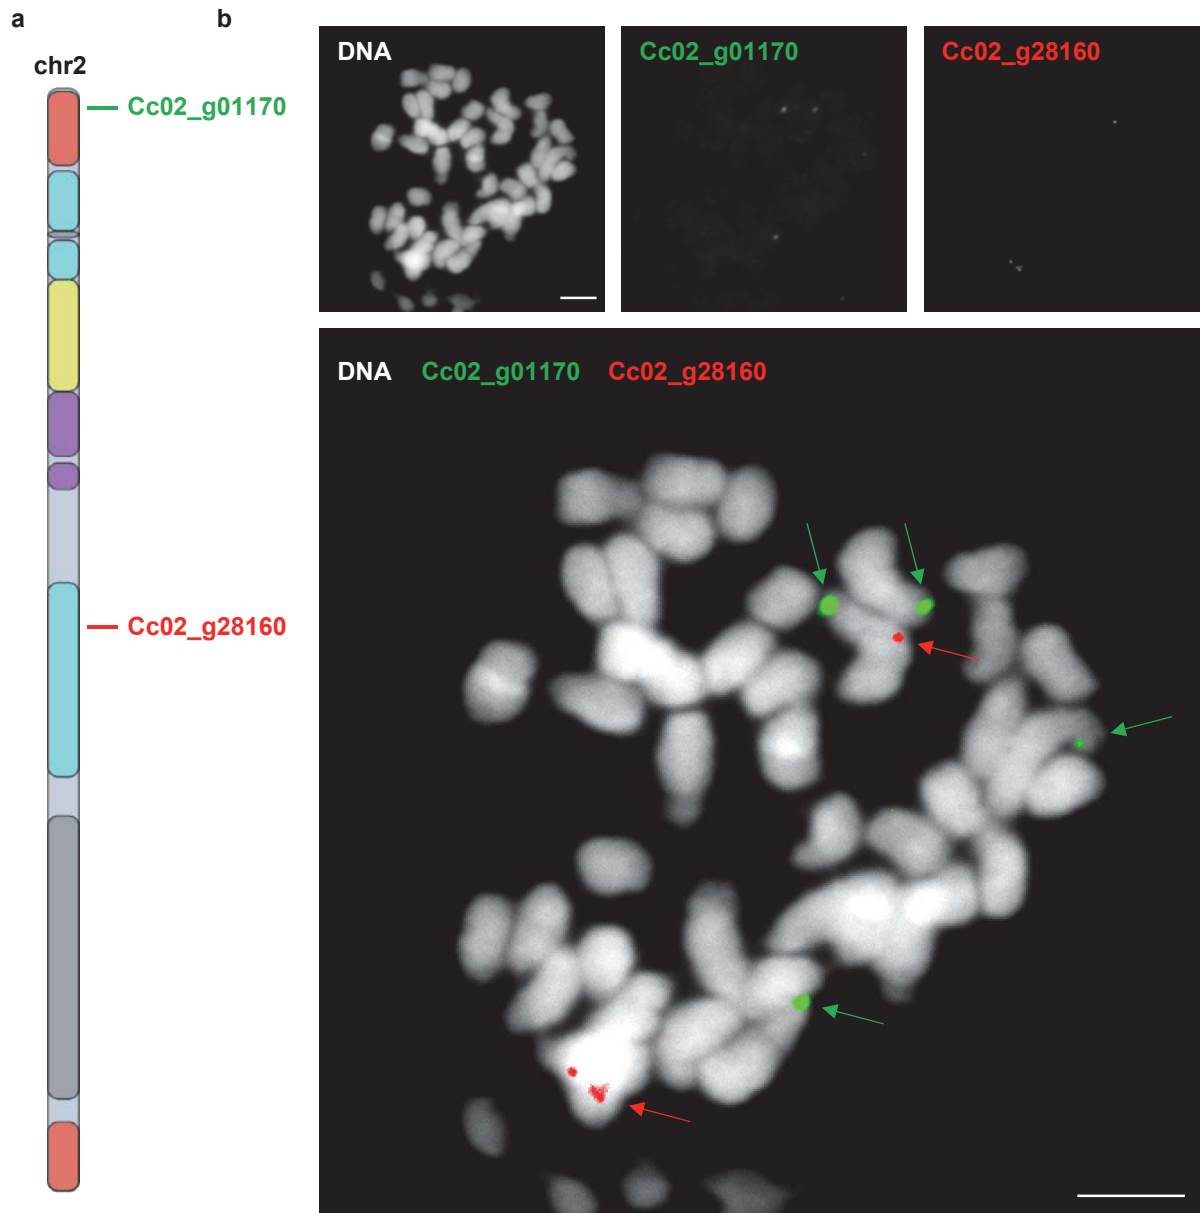

**Supplementary Fig. 13. Fluorescence *in situ* hybridization (FISH) analysis to test potential mis-assembly in the chromosome 2 of *Coffea arabica*.** (a) Sequence positions for two FISH probes in *Coffea canephora* chromosome 2 representing two regions that showed syntenic relationships with chromosome 2 and 9 of *Ophiorrhiza pumila* as shown in Supplementary Fig. 12. The chromosome 2 map of *C. canephora* with assigned ancestral blocks was obtained from Coffee Genome hub (<http://coffee-genome.org/coffeacanephora>). The probe names are corresponding to the gene ID in the *C. canephora* genome. (b) FISH mapping using two FISH probes on *C. arabica* chromosomes ( $2n = 4x = 44$ ). The Cc02\_g01170 probe shows four FISH signals, and the Cc02\_g28160 probe shows two signals on 44 chromosomes of the *C. arabica*. These six signals (green and red arrows) were not detected on the same chromosome. The experiment was repeated twice, and for each experiment, we verified at least six slides. The scale bar corresponds to 5  $\mu\text{m}$ .

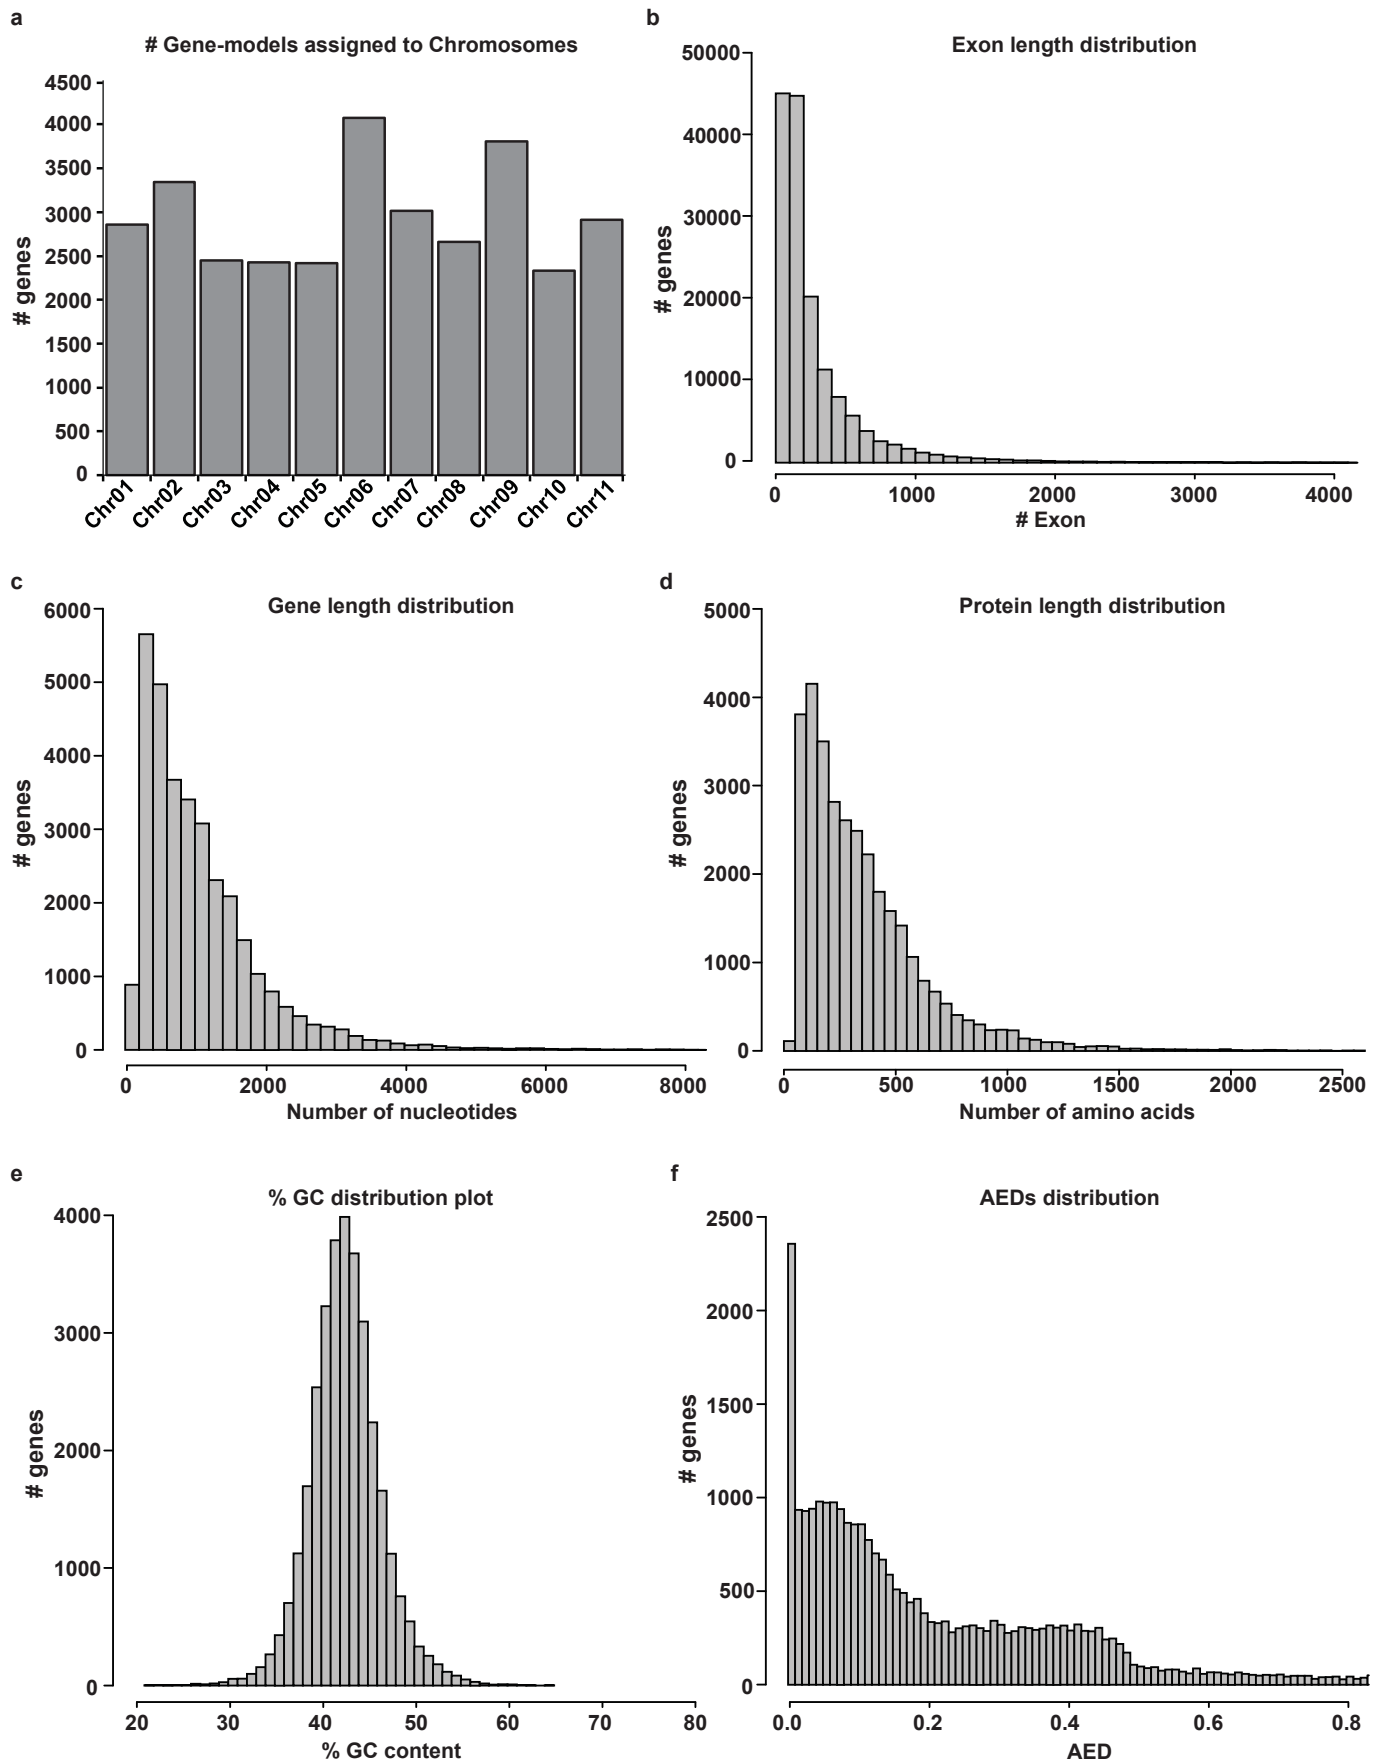

**Supplementary Fig. 14. Characteristics of *Ophiorrhiza pumila* predicted gene models.** (a) Gene models predicted across 11 chromosomes of *O. pumila*. (b) Exon length distribution plot. (c) Gene length distribution plot. (d) Protein length distribution plot. (e) % GC distribution plot for predicted gene models. (f) Distribution of annotation edit distance (AED).

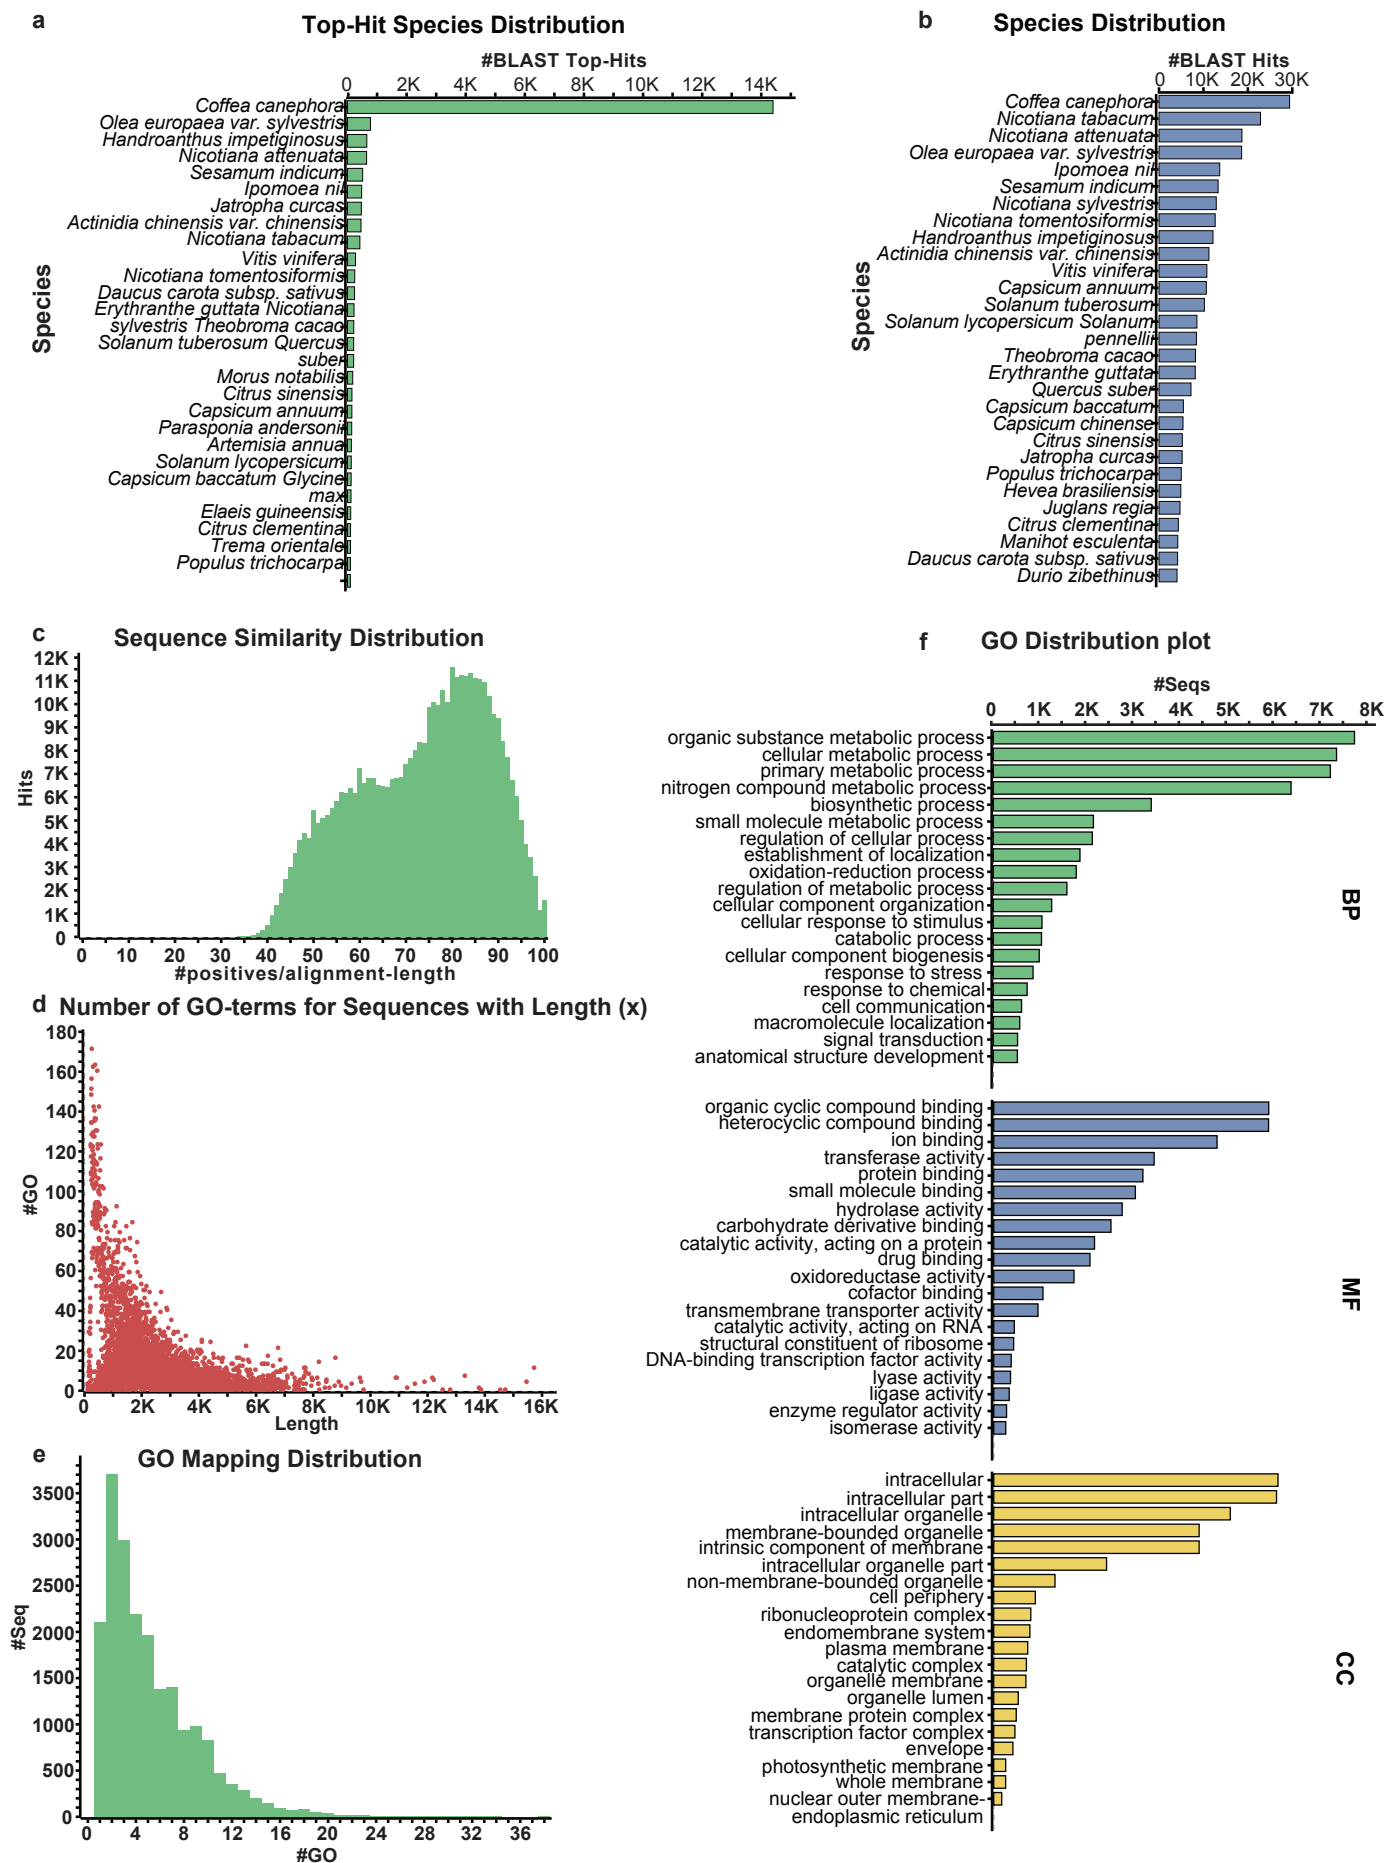

**Supplementary Fig. 15. Functional classification of *Ophiorrhiza pumila* gene models.** (a) Top-hit species distribution plot. (b) Species distribution plot based on database-based annotation. (c) Sequence similarity distribution plot. (d) Gene length distribution plot with number of assigned gene ontologies (GO). (e) GO mapping distribution plot. (f) GO distribution as biological process (BP), Molecular function (MF), and Cellular component (CC) categories. Annotation based functional classification was performed using Omics box software. Source data are provided as a Source Data File.

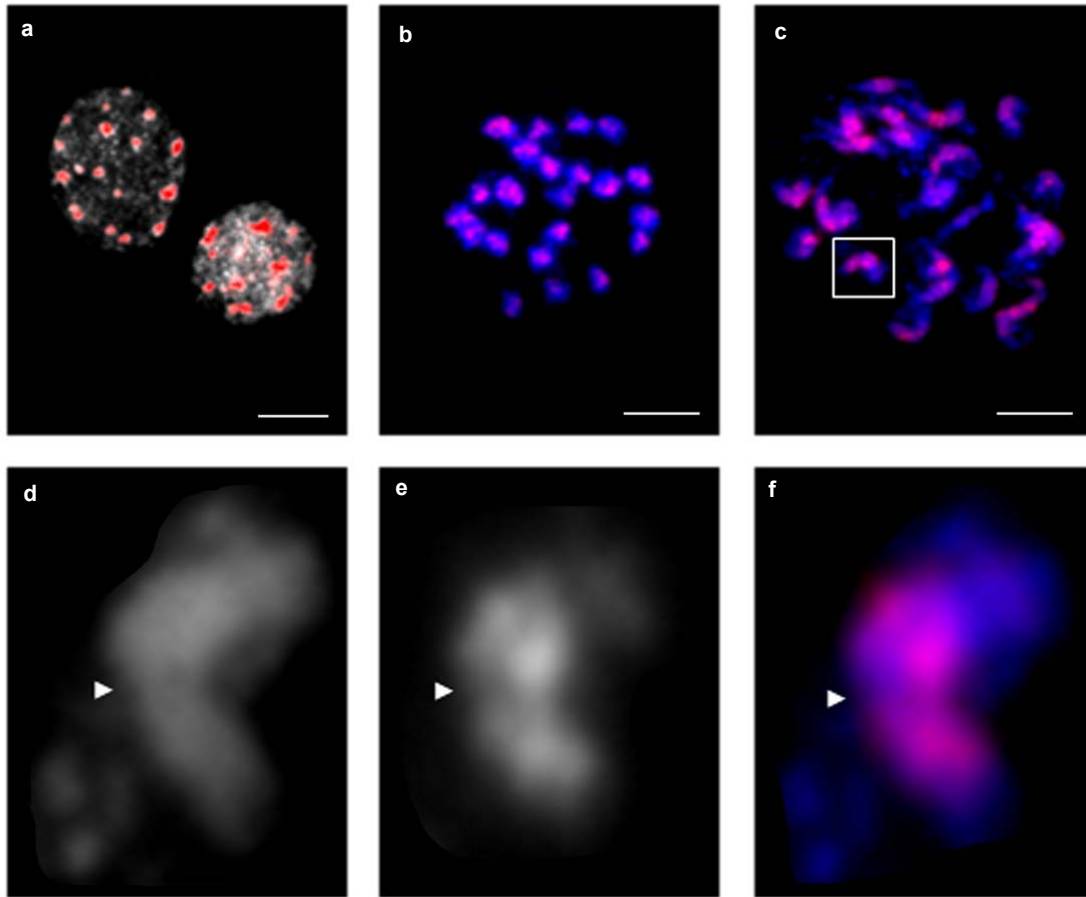

**Supplementary Fig. 16. Chromosome primary constriction and centromere localization in *Ophiorrhiza pumila* chromosomes using Fluorescence *in situ* hybridization (FISH) analysis.** (a) Detection of OpCEN (red) at the heterochromatic chromocenters in the nuclei (white). (b) Centromeric detection of OpCEN (red) in somatic metaphase chromosomes (blue). (c) Detection of OpCEN (red) at centromeric regions of prometaphase chromosomes (blue). (d)-(f) Cut-off image for chromosome selected in the white color box in (c). (d) DAPI-stained chromosome. (e) Detection of OpCEN signal. (f) Merged image. Arrowheads indicated primary constriction. Repeat analysis using *O. pumila* reference genome identified pericentromeric repeat sequence, conserved across all chromosomes, and positioned sat putative centromere region, named OpCEN. Probes designed for OpCEN labeled putative centromere of *O. pumila*. The scale bar corresponds to 5 $\mu$ m. The FISH experiment was performed twice, and for each experiment, at least 10 slides were analyzed.



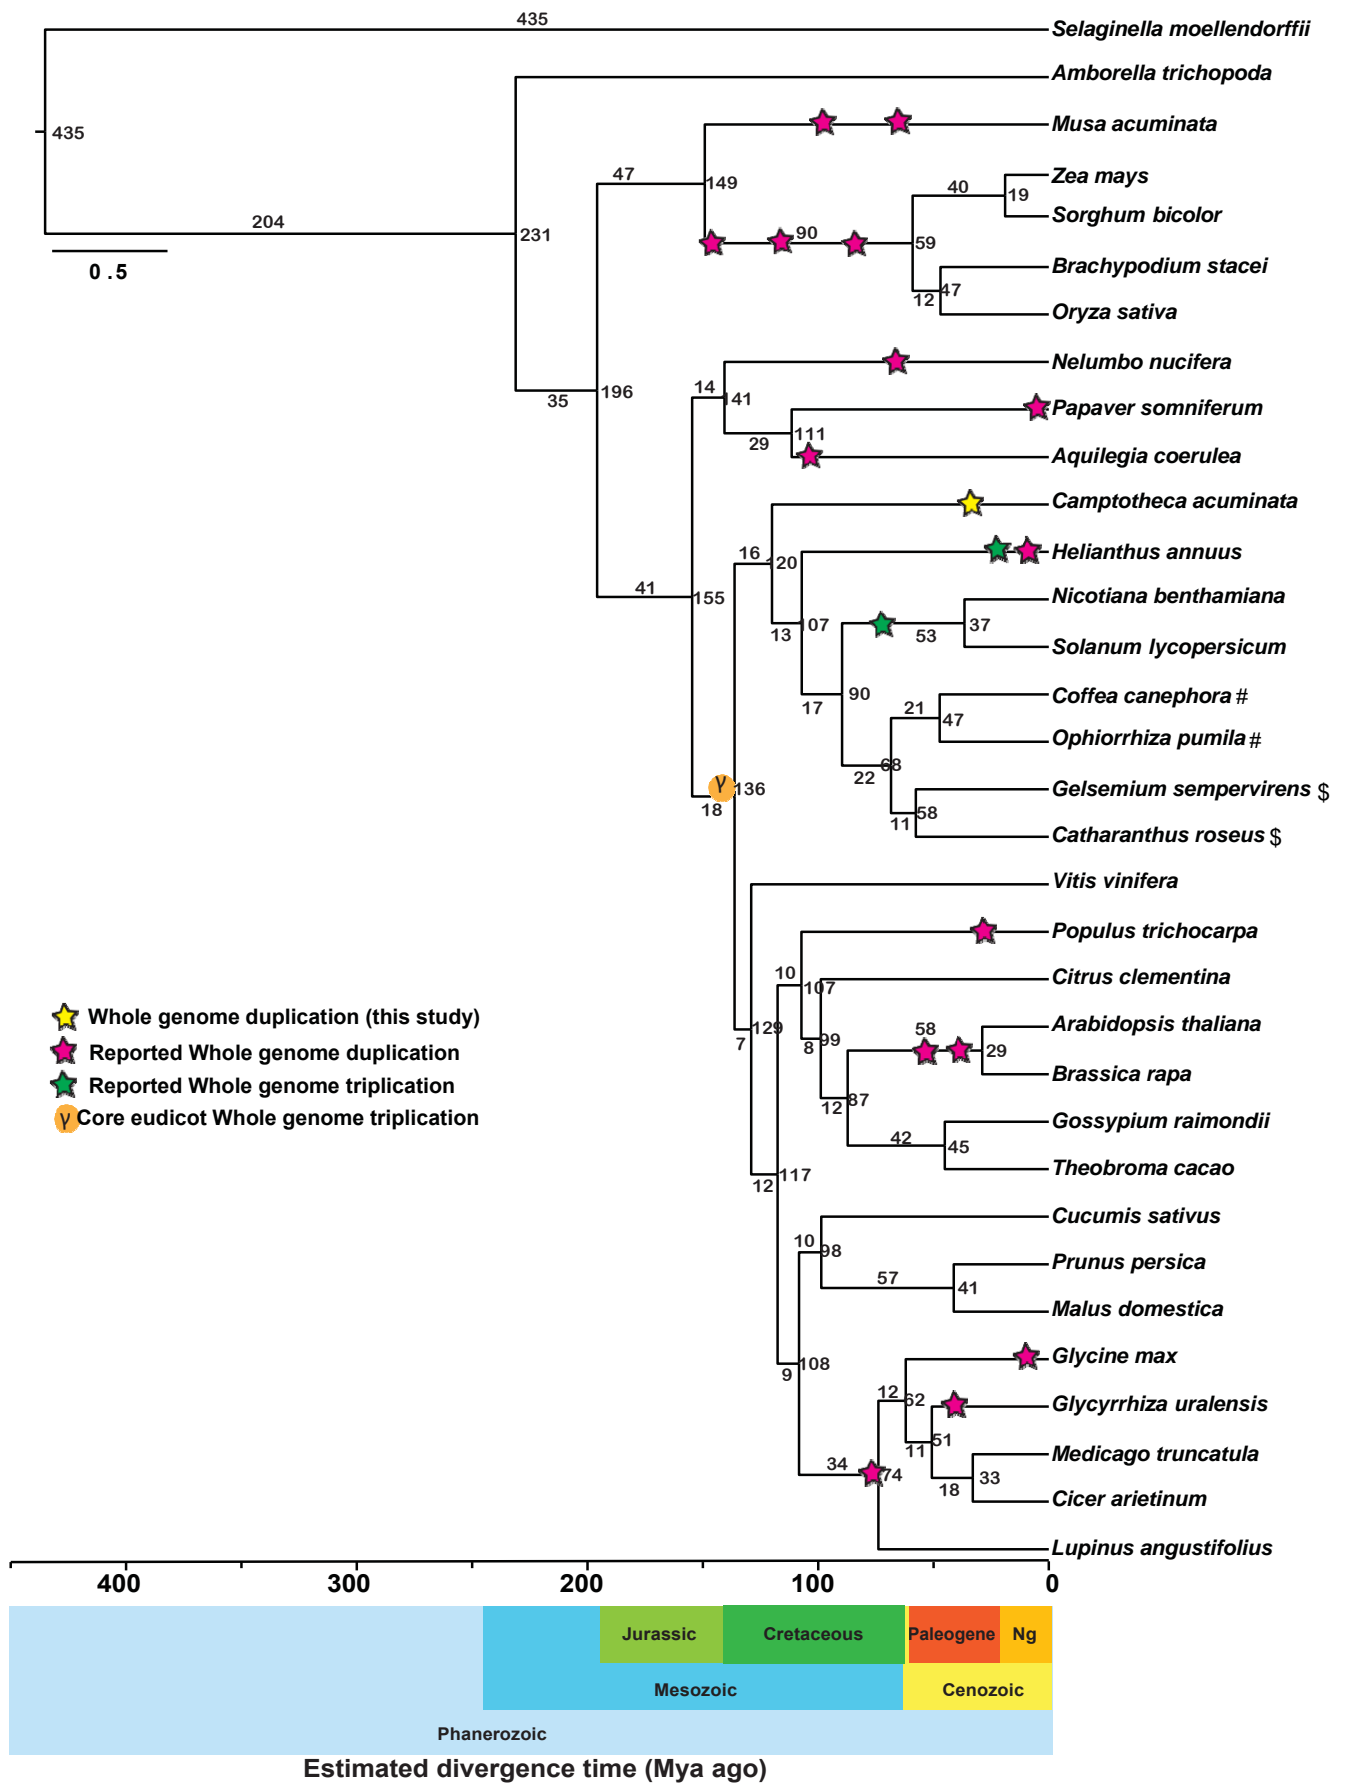

**Supplementary Fig. 18. Estimated divergence and whole genome duplication for monoterpene indole alkaloids producing species.** The lineage divergence time as branch length is indicated at each of the branch points in Million years ago (Mya). Divergence time for *Ophiorrhiza pumila* with coffee and *Camptotheca acuminata* was estimated at 47 Mya and 120 Mya, respectively. The whole-genome duplication for *C. acuminata* was identified and the duplication time was estimated. “#” and “\$” depicts species from Rubiaceae and Apocynaceae families, respectively.

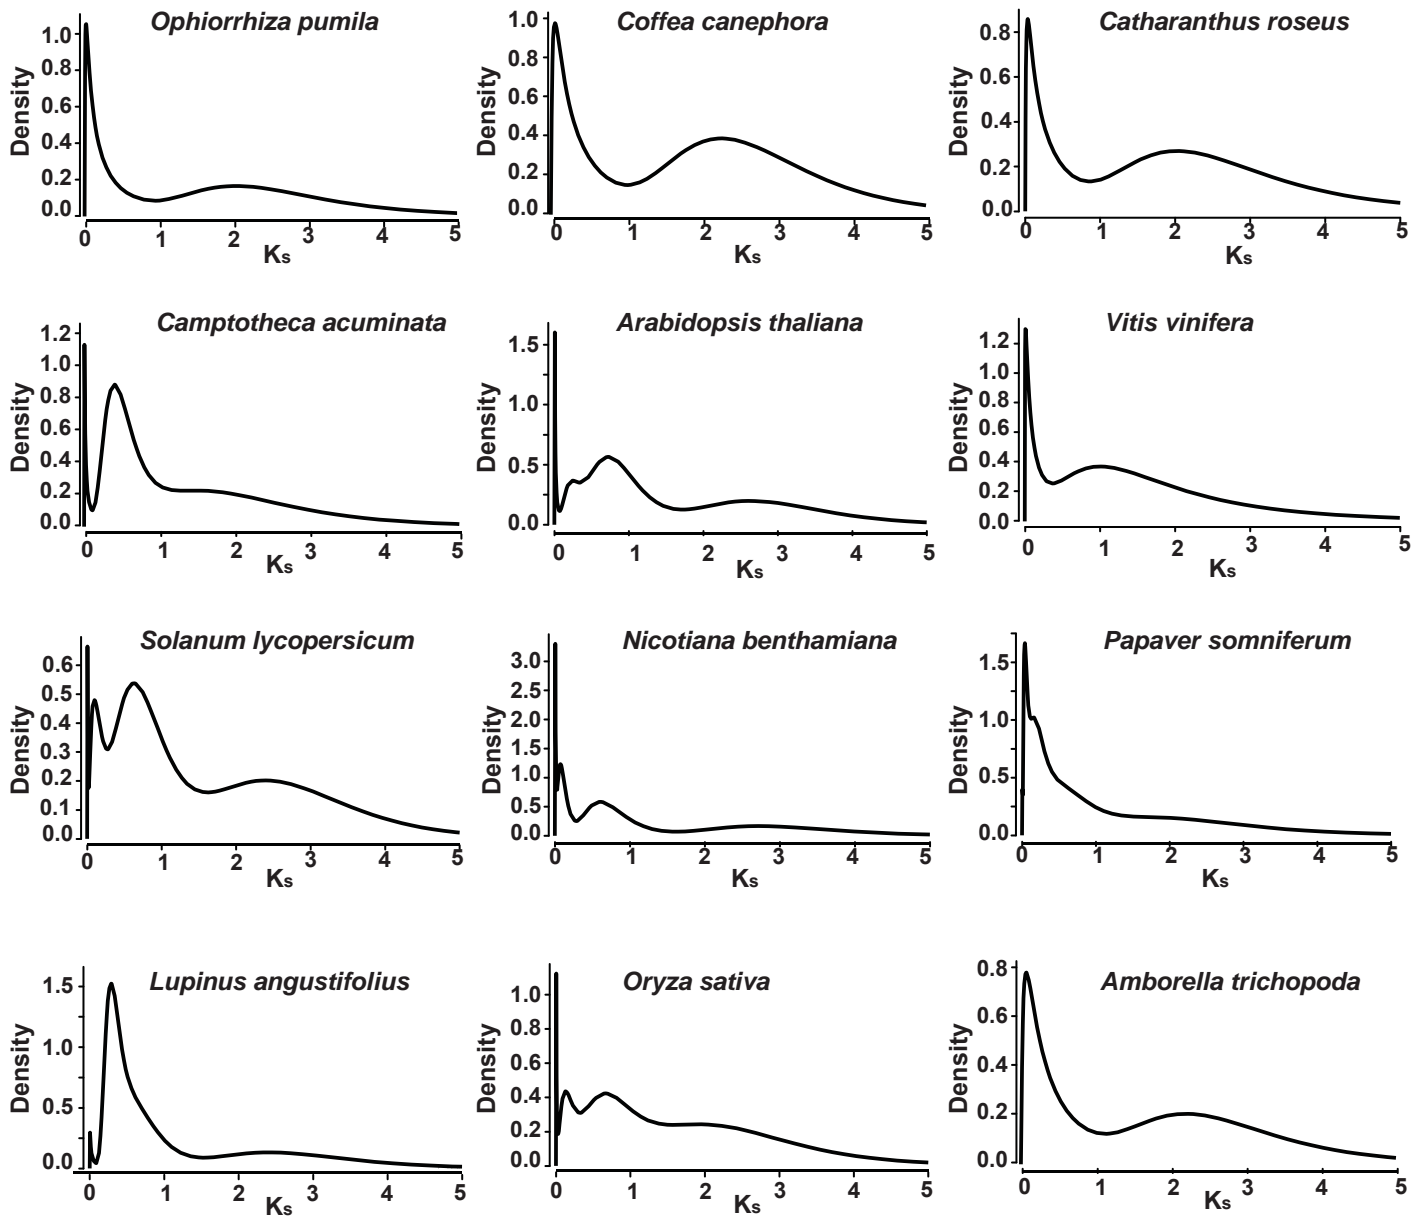

**Supplementary Fig. 19.** Density plot depicting  $K_s$  (synonymous substitution rate) distribution of paralogous gene pairs for selected eudicot plant genome assemblies.



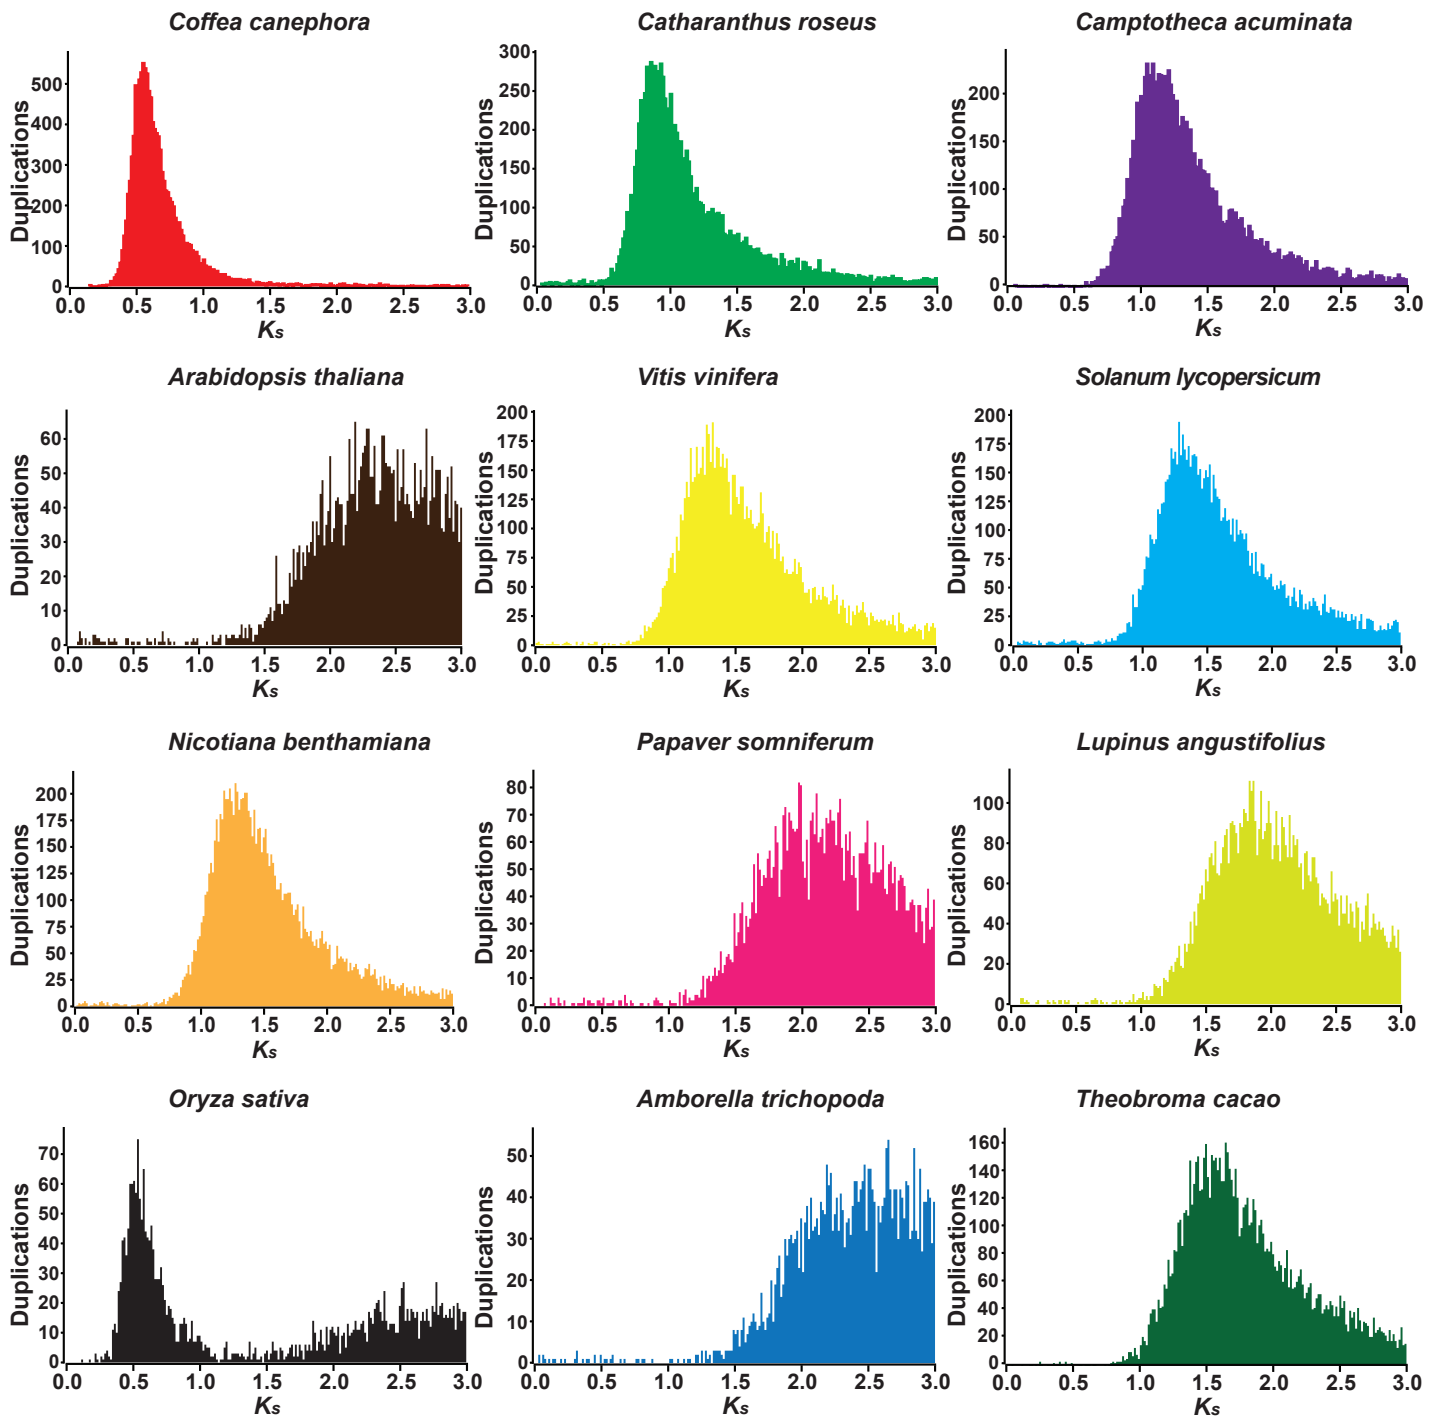

Supplementary Fig. 20. Density plot depicting  $K_s$  (synonymous substitute rate) distribution for orthologous gene pairs identified between *Ophiorrhiza pumila* and 12 other eudicot plant genome assemblies.

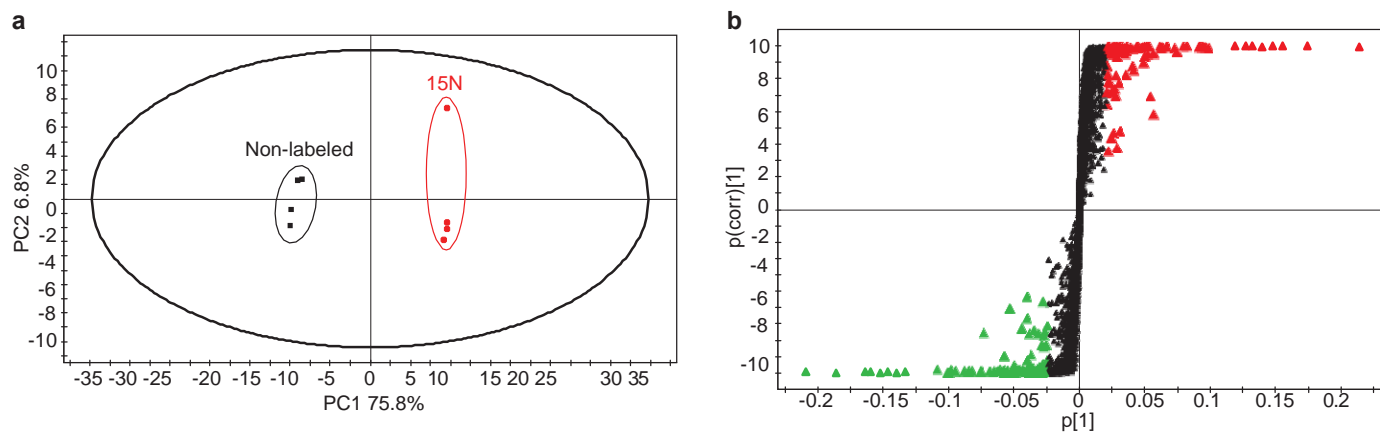

**Supplementary Fig. 21. Metabolite profiling for complete nitrogen labeled ( $^{15}\text{N}$ ) or non-labeled hairy roots to identify nitrogen-containing metabolites in *Ophiorrhiza pumila*.** (a) Principle component analysis for labeled and non-labeled hairy root metabolite profiling datasets. Five biological replicates for each condition were used for metabolite profiling. (b) S-plot based multivariate analysis approach to select characteristic metabolite features of labeled and non-labeled hairy root samples. Metabolite features colored red and green represents stable isotope labeled and non-labeled metabolites, respectively.

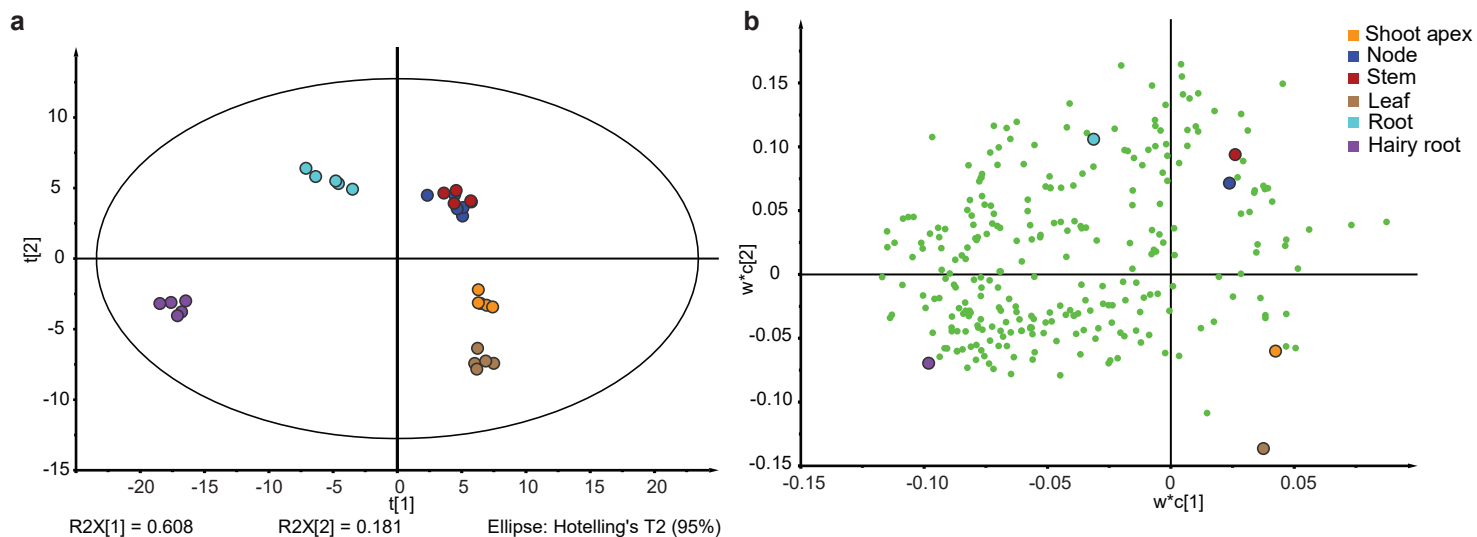

**Supplementary Fig. 22. Metabolite profiling for six tissues of *Ophiorrhiza pumila*.** *O. pumila* metabolome database was established by assigning chemical identity to metabolite features using previously reported complete carbon labeling approach and complete nitrogen labeling approach used in this study. **(a)** Principle component analysis. **(b)** Loadings plot for metabolite profiling datasets of six tissues. Five biological replicates for each tissue were used for metabolite profiling.

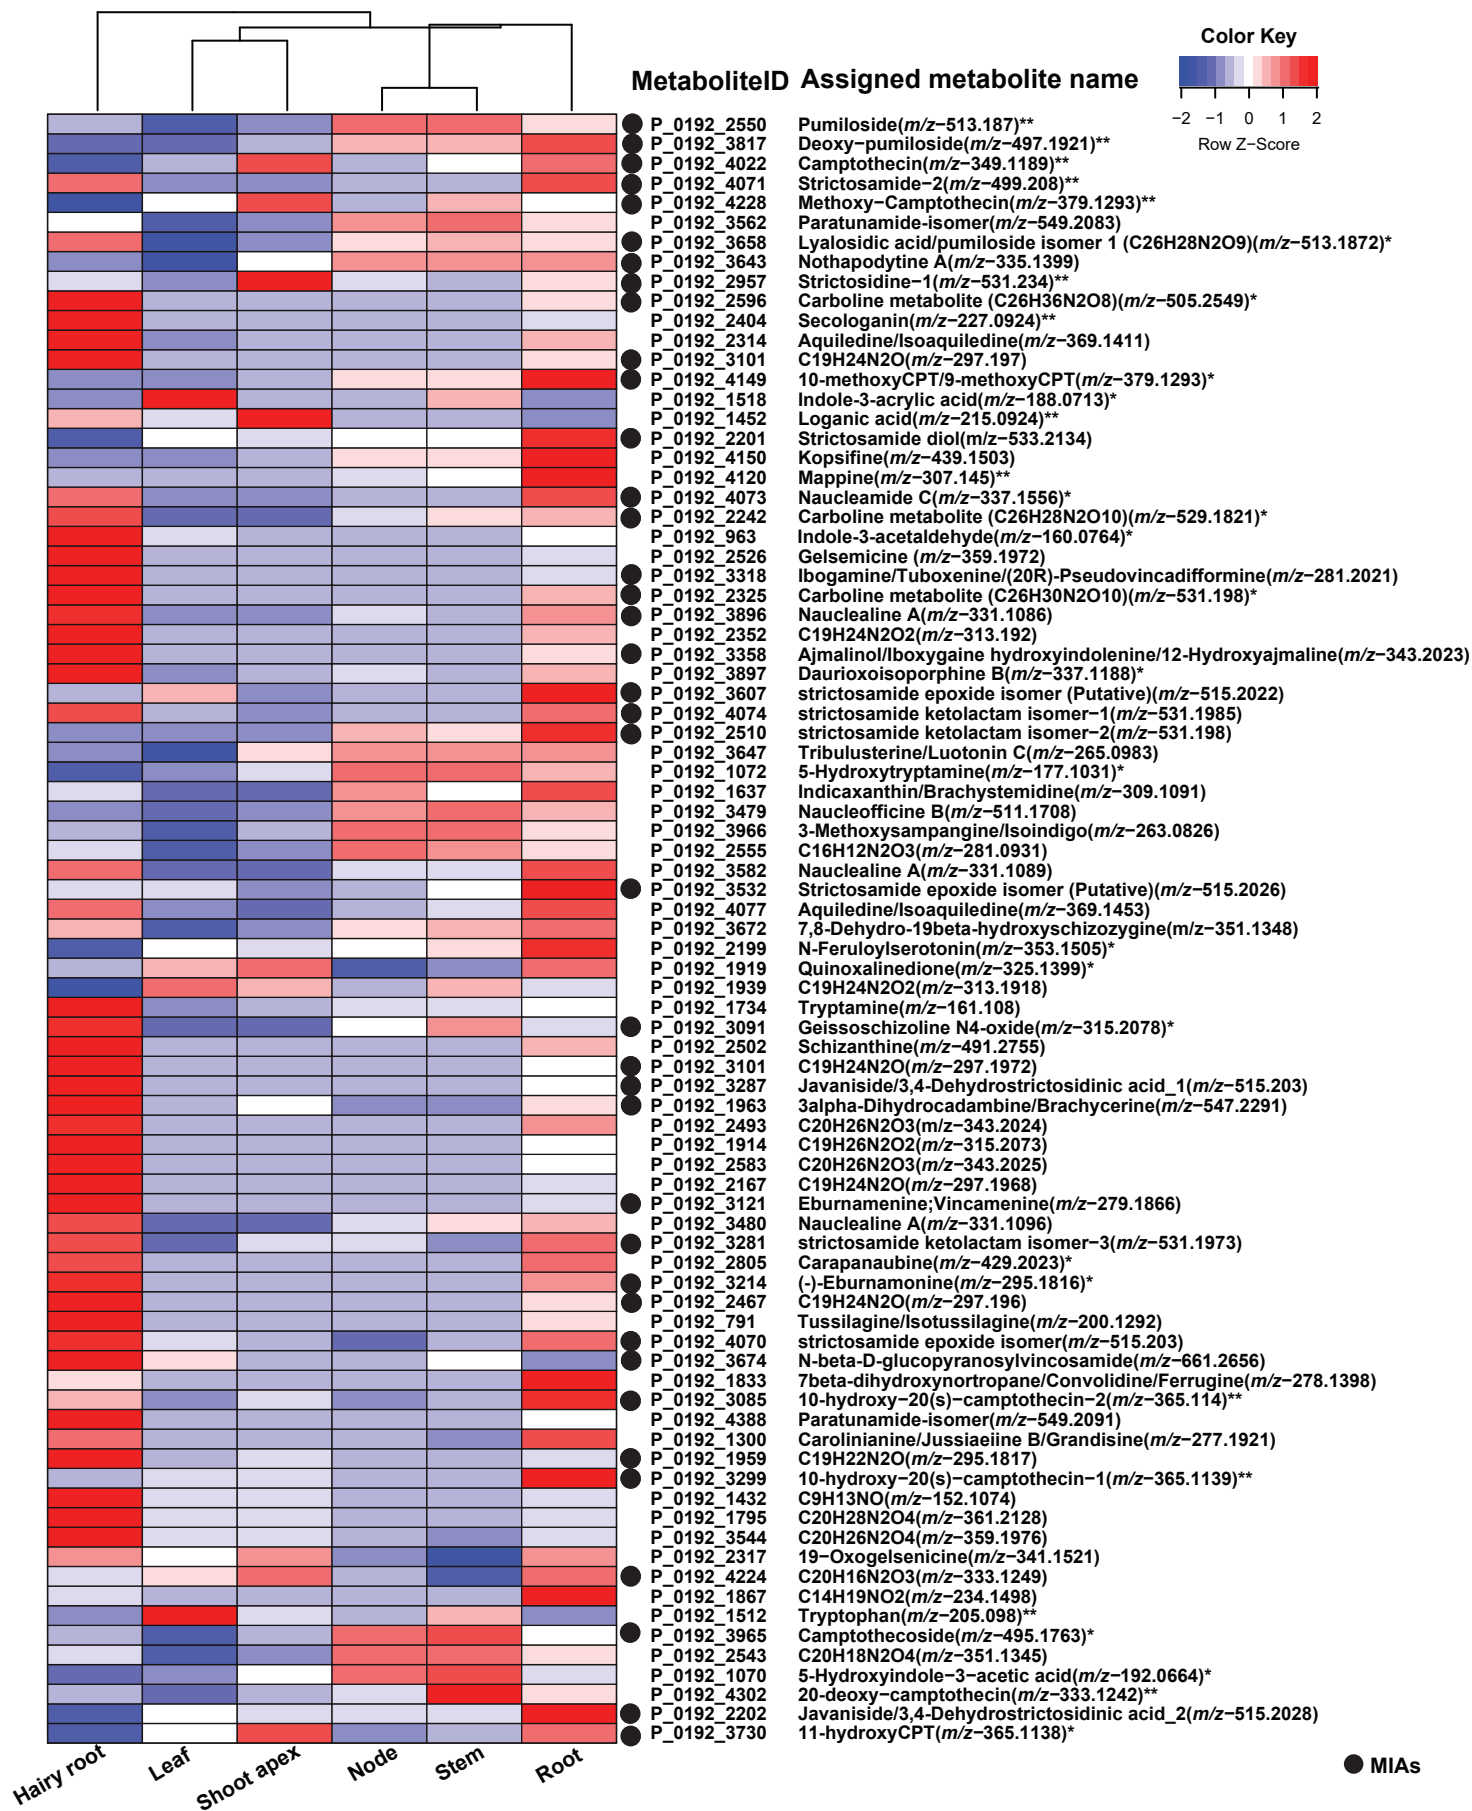

**Supplementary Fig. 23. Accumulation of specialized metabolites in six tissues of *Ophiorrhiza pumila*.** \* and \*\* represent chemically assigned metabolites based on MS/MS analysis using the public database and pure standards, respectively; *m/z*-mass by charge ratio. The color intensity refers to the scaled median intensity of metabolites across tissues of *O. pumila* using five biological replicates for each tissue.

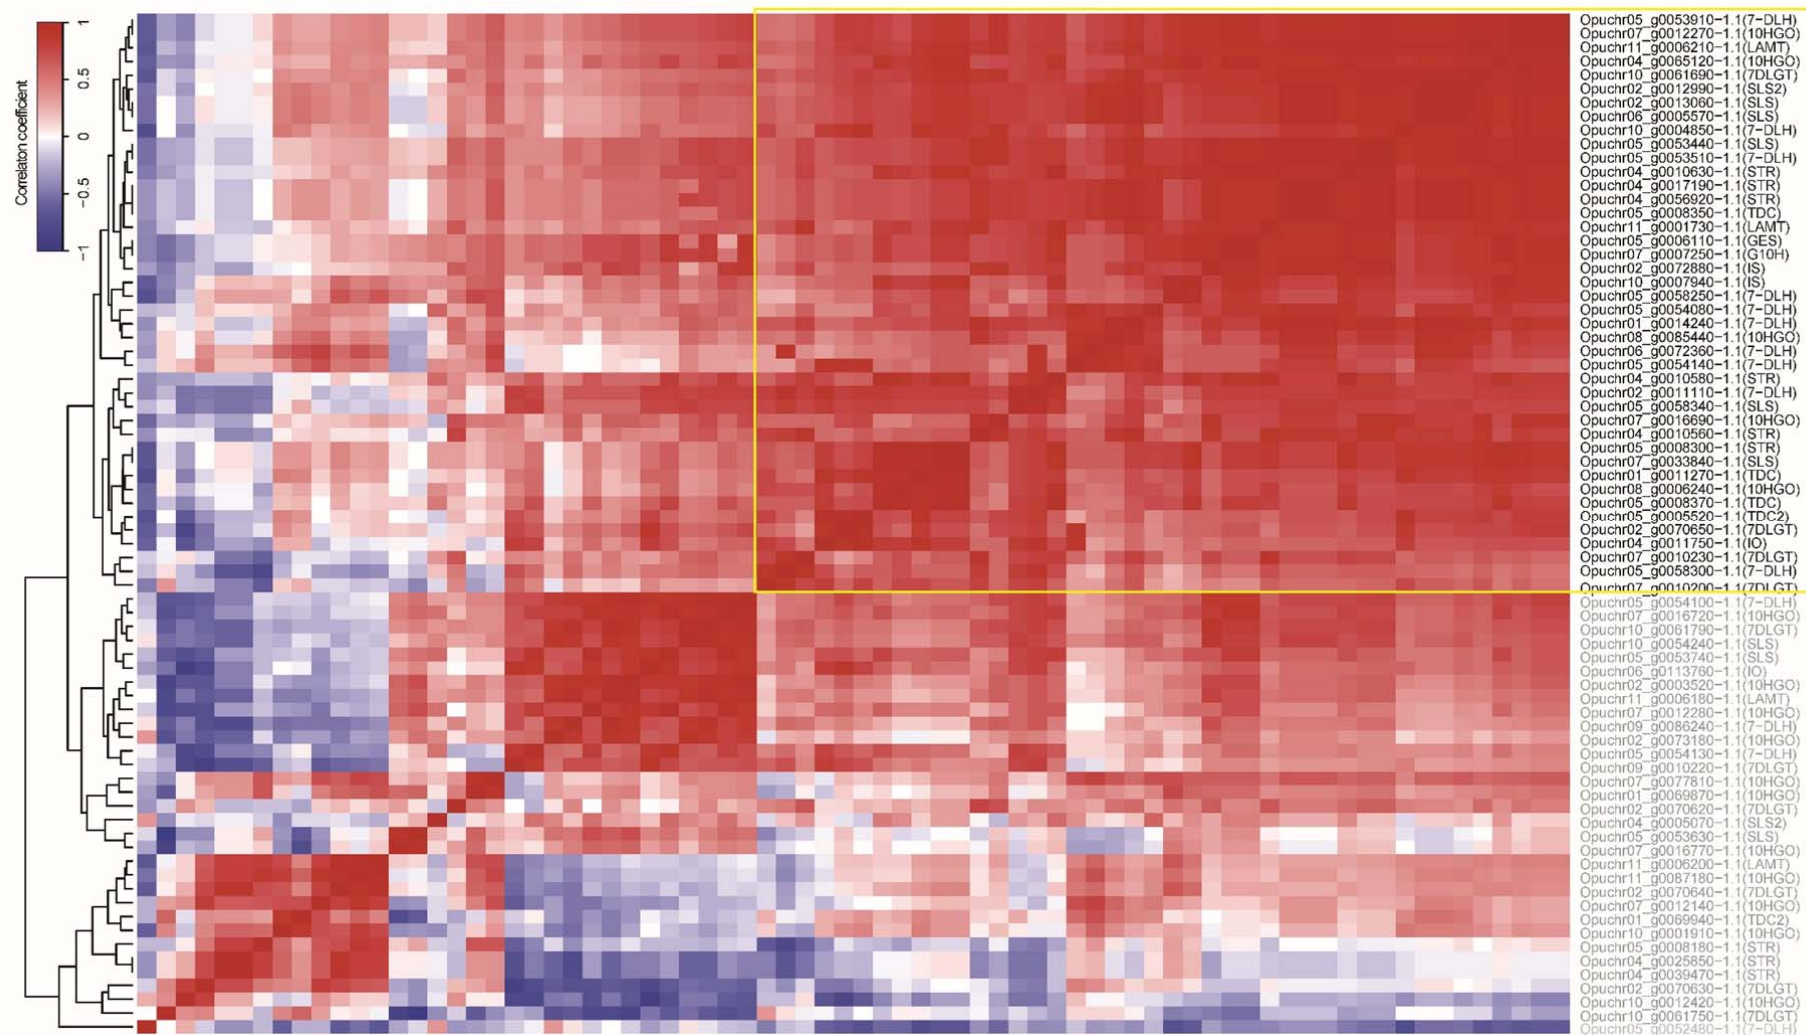

**Supplementary Fig. 24. Coexpression based hierarchical clustering for genes assigned to enzymes from the secoiridoid biosynthesis pathway in *Ophiorrhiza pumila*.** Spearman's correlation coefficients were calculated using transcript expression data for seven tissues of *O. pumila*. Hierarchical clustering identified complete secoiridoid biosynthesis pathway as a gene cluster at the second order of the dendrogram (selected within a yellow-colored box). Source data are provided as a Source Data file.



**Supplementary Fig. 25. Coexpression based hierarchical clustering for genes assigned to enzymes from monoterpene indole alkaloid (MIA) biosynthesis in *Ophiorrhiza pumila*.** Spearman's correlation coefficients were calculated using transcripts expression data for seven tissues of *O. pumila*. Genes associated with MIA biosynthesis and membered within a coexpressed gene-cluster (selected within a yellow-colored box) including genes assigned to secoiridoid biosynthesis pathway were selected. Genes colored as green are genes assigned to secoiridoid biosynthesis pathways. Source data are provided as a source Data file.

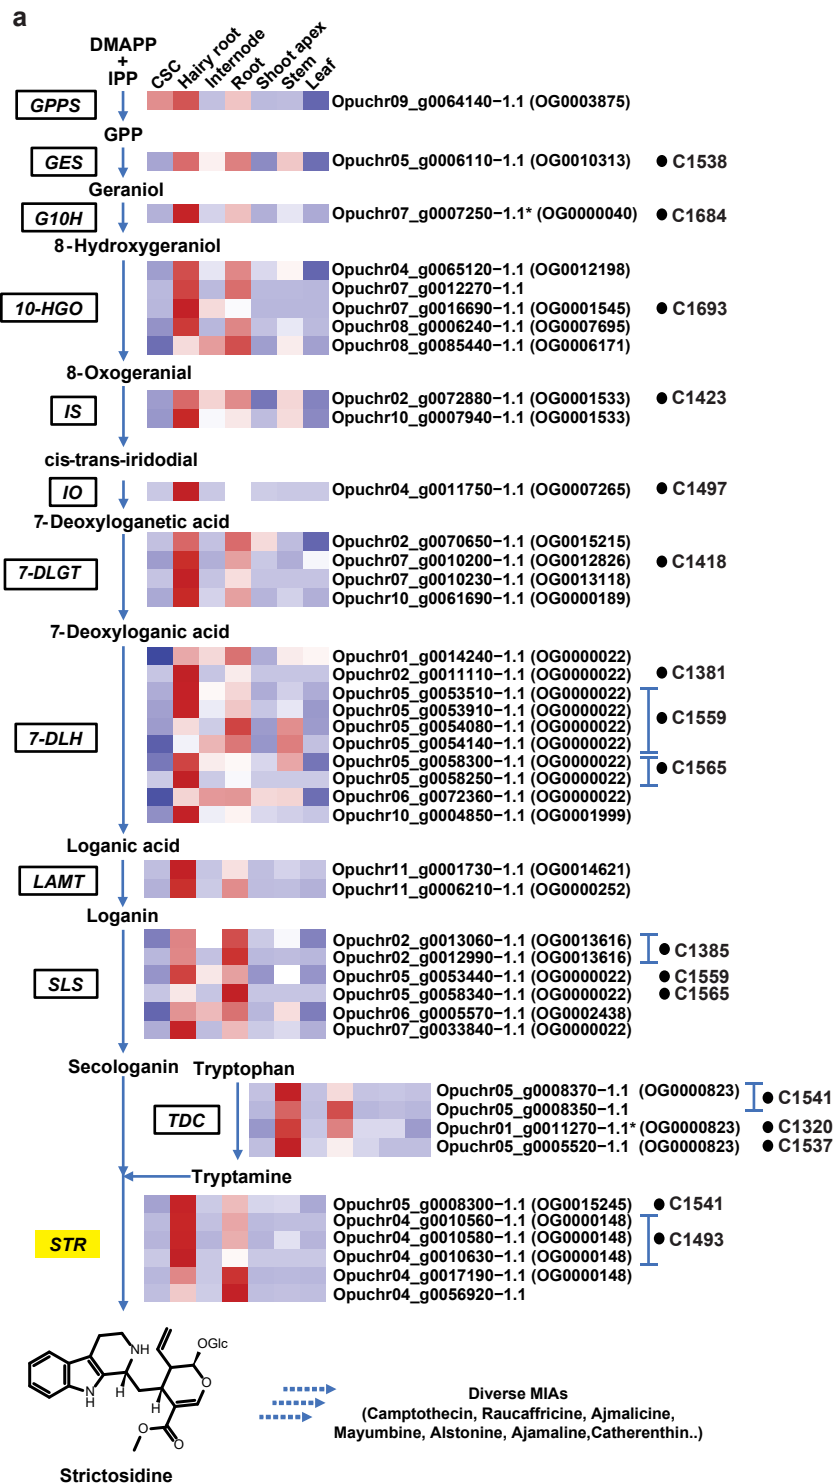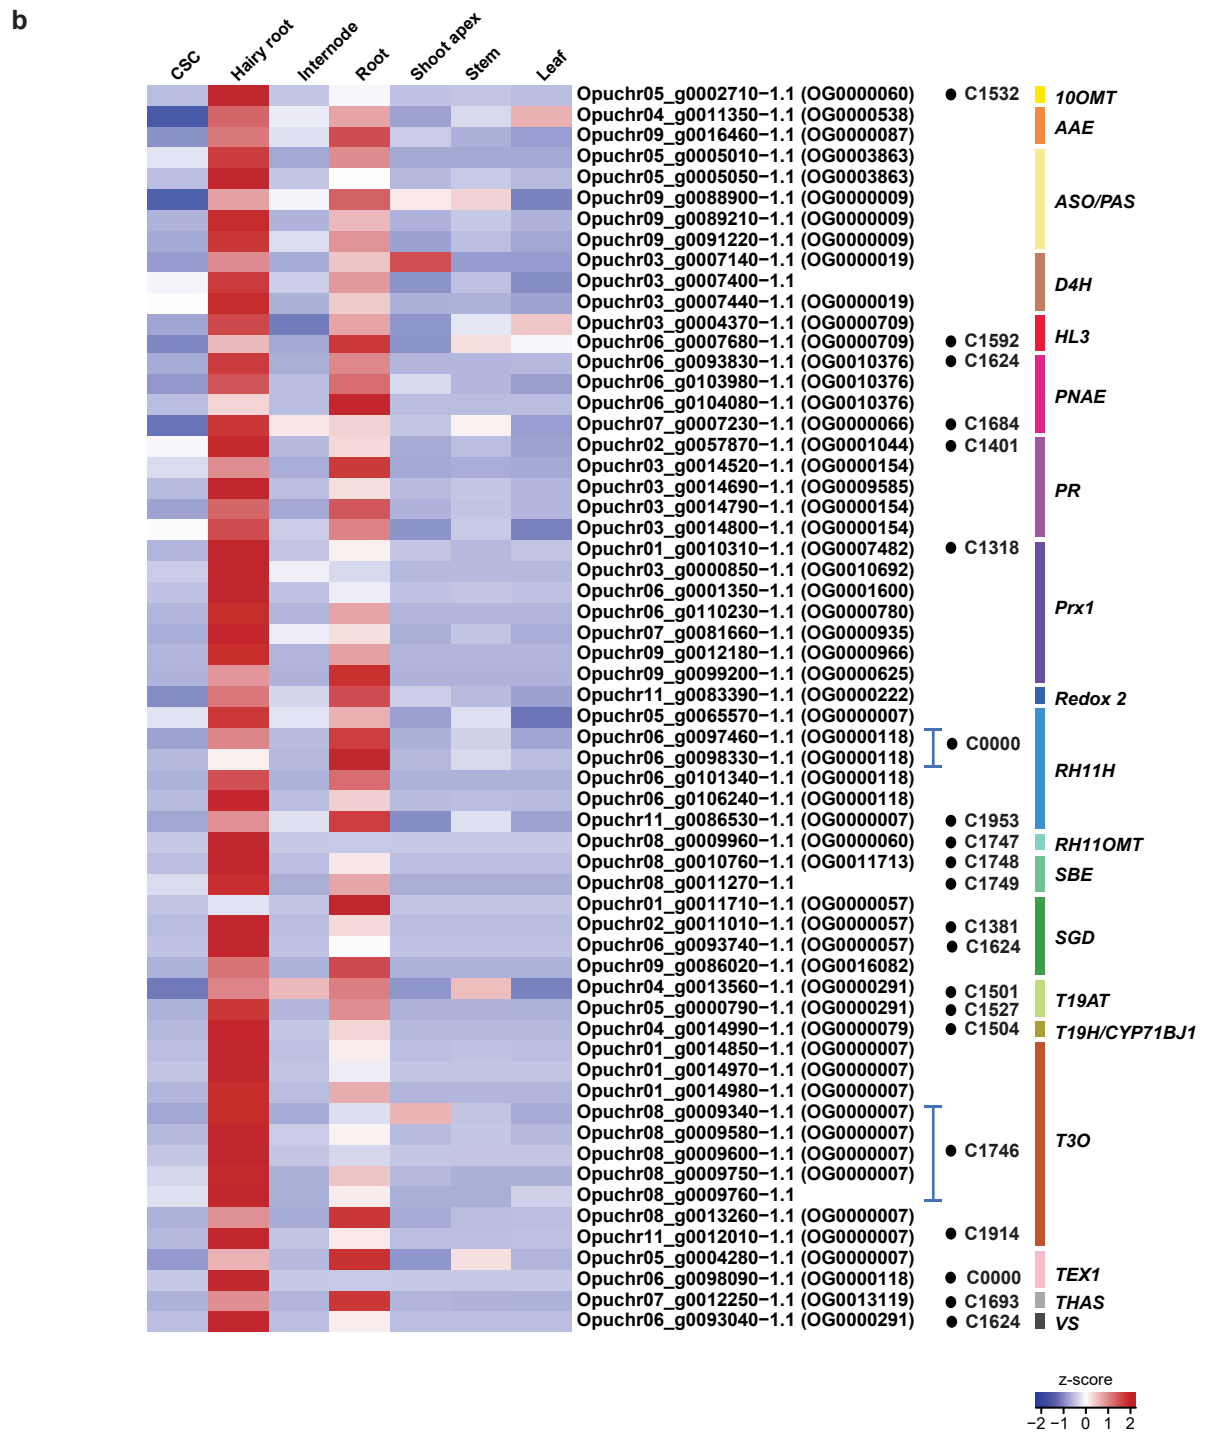



**Supplementary Fig. 26. Expression of genes assigned to secoiridoid and monoterpene indole alkaloid (MIA) biosynthesis pathway across seven tissues of *Ophiorrhiza pumila*.** Expression of genes assigned to secoiridoid biosynthesis pathway (a) and MIA biosynthesis (b) across seven tissues of *O. pumila*. The color code used for individual genes corresponds to their position in MIA biosynthesis pathway in Supplementary Fig. 1. Genes were assigned to respective biosynthesis pathways based on co-expression and sequence homology against previously characterized genes. Cell suspension culture (CSC) and hairy root tissues are known to accumulate no and high MIA, respectively. Gene expression analysis showed tissue specific expression of genes, which were correlated with accumulation of MIA in *Ophiorrhiza* tissues. Associated orthogene families (OGs) and gene-cluster IDs are provided together with the gene IDs. Abbreviations- *GPPS*: geranyl diphosphate synthase; *GES*: geraniol synthase; *G10H*: geraniol 10-hydroxylase; *10-HGO*: 10- hydroxygeraniol oxidoreductase; *IS*: iridoid synthase; *IO*: iridoid oxidase; *7-DLGT*: 7-deoxyloganetin glucosyltransferase, *7-DLH*: 7-deoxyloganic acid 7-hydroxylase, *LAMT*: loganic acid O-methyltransferase; *SLS*: secologanin synthase; *TDC*: tryptophan decarboxylase; *STR*: strictosidine synthase; *SGD*: strictosidine beta-D-glucosidase; *THAS*: tetrahydroalstonine synthase; *PNAE*: polyneuridine- aldehyde esterase; *ASO/PAS*: O-acetylstemmadenine oxidase; *AAE*: acetylajmaline esterase; *TEX1*: tabersonine 6,7-epoxidase 1; *HL3*: hydrolase 3; *10OMT*: 10- hydroxycamptothecin O-methyltransferase; *T19H*: tabersonine-19-hydroxy-O-acetyltransferase; *RH11H*: rankinidine/humantenine-11-hydroxylase 3; *D4H*: deacetoxyvindoline 4-hydroxylase; *Prx1*: peroxidase 1; *PR*: perakine reductase. Source data are provided as Source Data file.

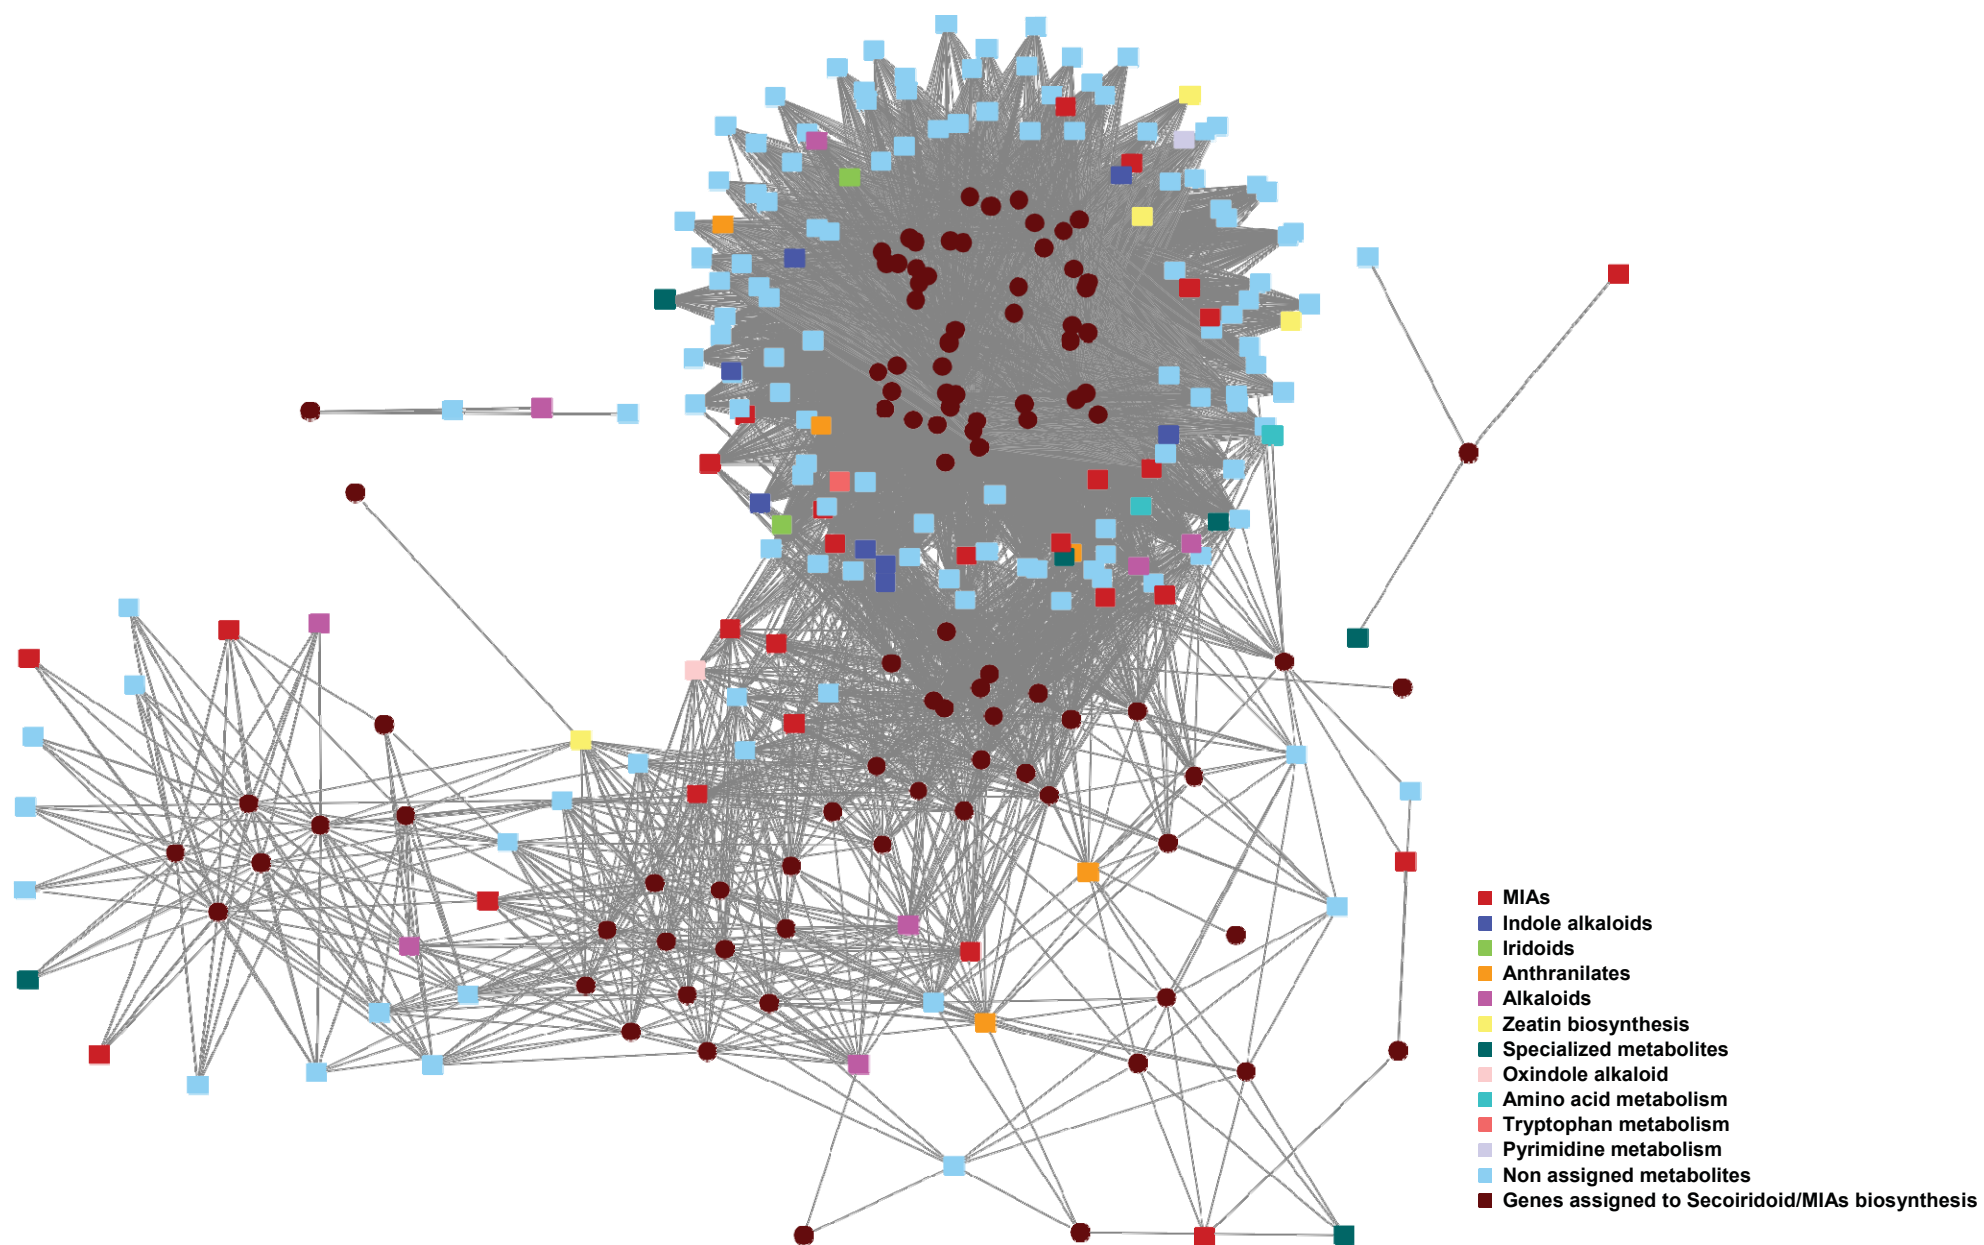

**Supplementary Fig. 27. Gene-to-metabolite relationship network associated with MIA biosynthesis.** The Pearson's correlation matrix was calculated using the psych package in R and drawn using Cytoscape (v3.6.0). The circle and square nodes represent genes assigned to secoiridoid and MIA biosynthesis pathways (shown in the Supplementary Fig. 26), and the metabolites, respectively. Edges represent gene-metabolite pairs with paired Pearson Correlation coefficient scores over 0.7 and corrected  $p$ -value  $< 0.05$ . Source data are provided as a Source Data file.

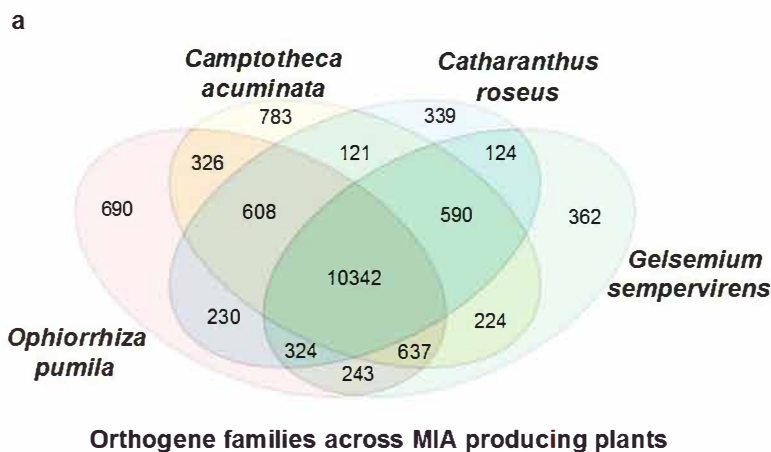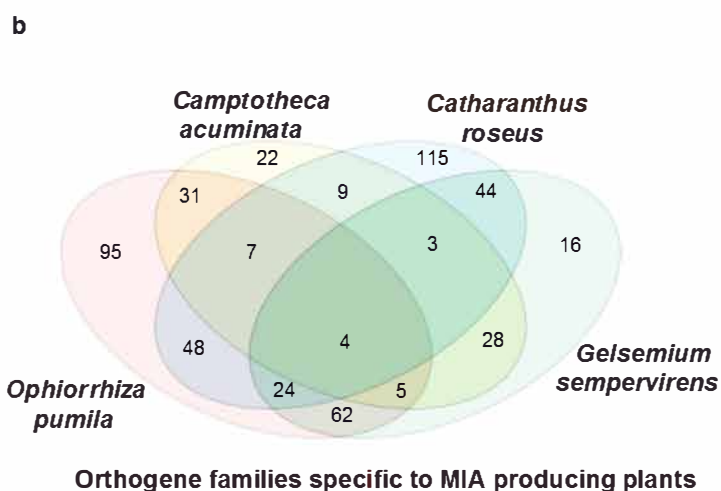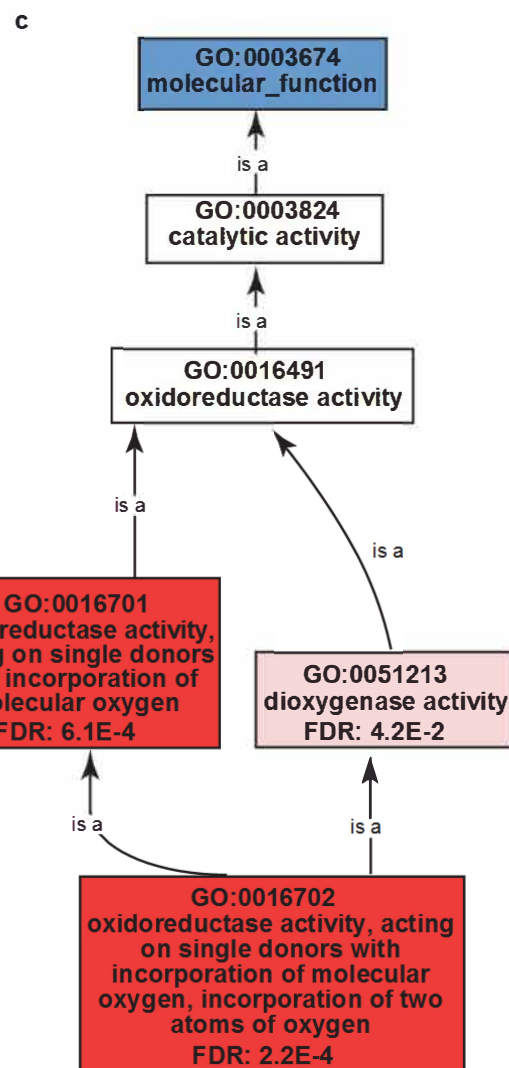

**Supplementary Fig. 28. Orthogene families across monoterpene indole alkaloid (MIA) producing plant species.** OrthoFinder based gene family classification was performed for 13 plant species, and orthogenes assigned to MIA producing plants were used for comparison. **(a)** Orthogenes shared among four MIA producing plant species. **(b)** Orthogenes specific to MIA producing plants. **(c)** Gene ontology enrichment analysis for *Ophiorrhiza pumila* genes assigned to MIA specific orthogene families as test set and *O. pumila* genome as reference set. Statistical significance was estimated using Fisher's Exact test (two-sided) with the corrected *p*-value cutoff set as 0.05. GO enrichment graph for statistically significant GO terms were drawn using Omics box software.

a Orthogene family OG0000148

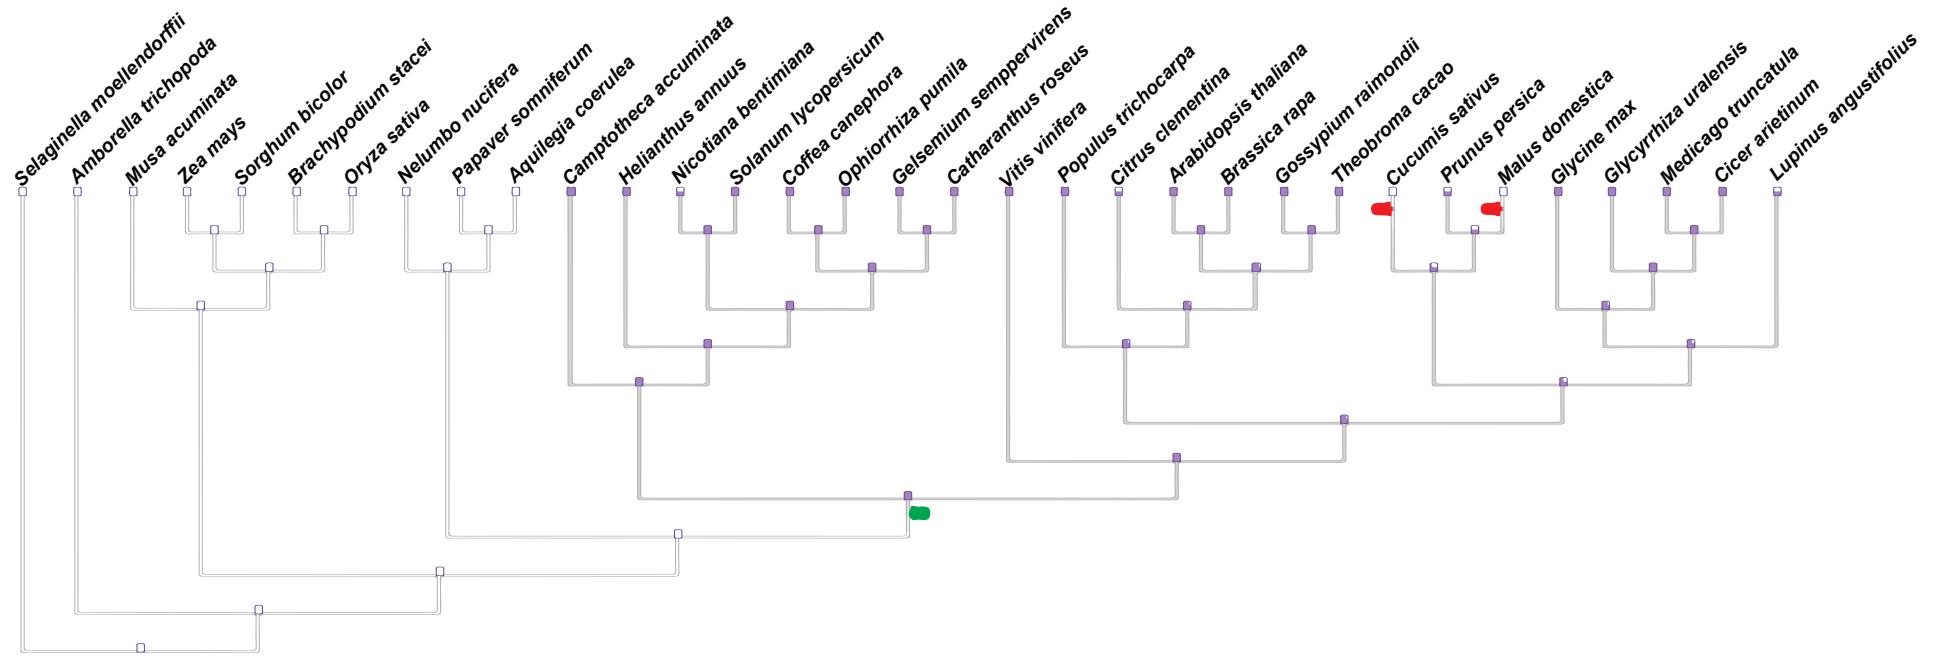

b Orthogene family OG0015245

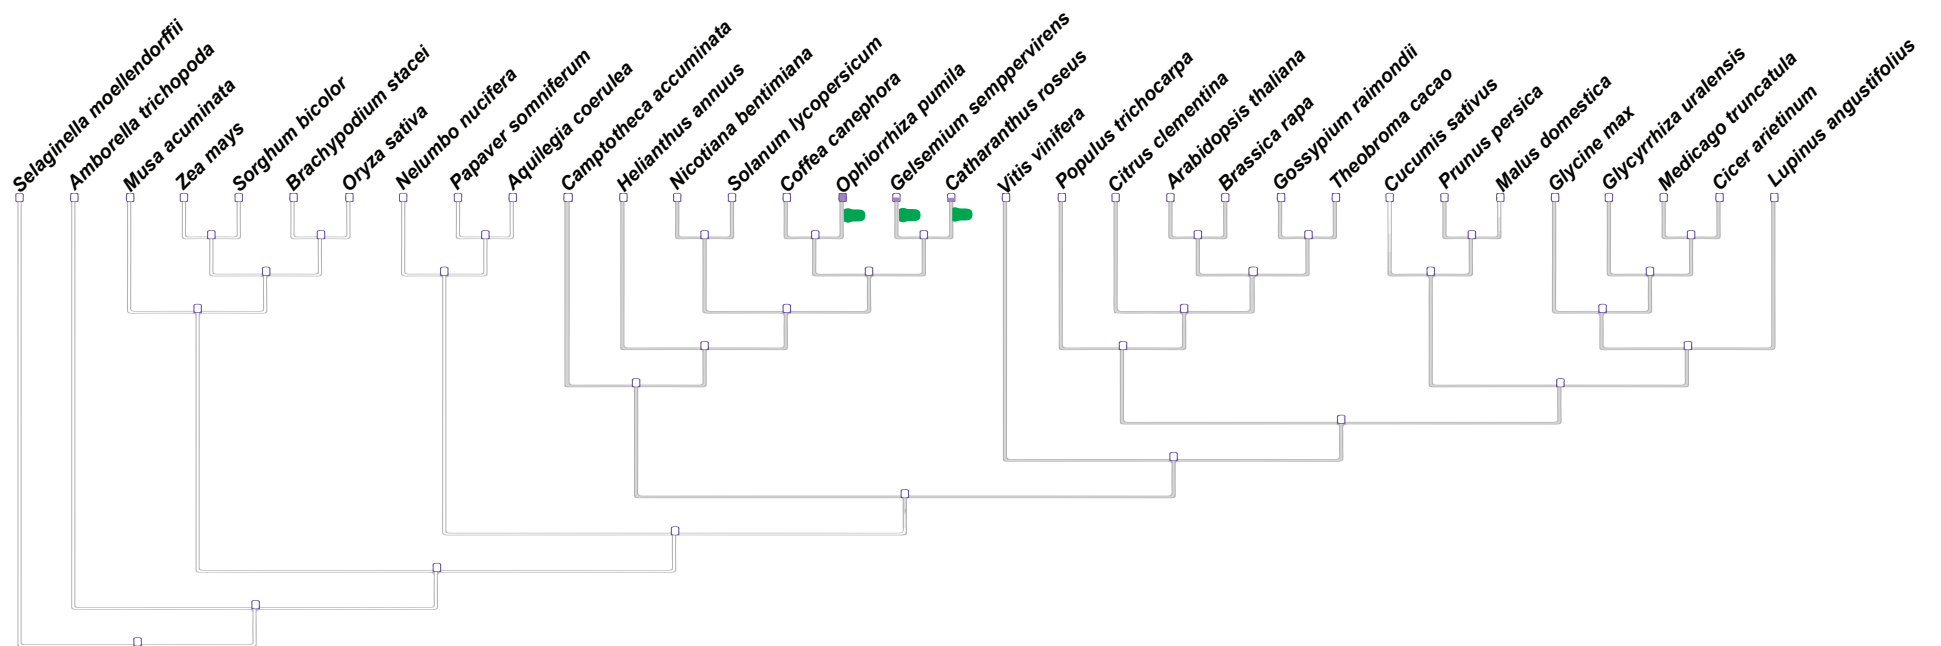

**Supplementary Fig. 29. Gain, loss, expansion, or contraction for gene families annotated as strictosidine synthase (STR) across 33 plant species.** (a) Orthogene family OG0000148 representing genes annotated as STR and consisting of member genes across multiple plant species. (b) Orthogene family OG0015245 consisting of functionally characterized STRs and specifically gained in the strictosidine derived monoterpene indole alkaloids producing plant species. Evolutionary analysis of gene content was performed using COUNT software. Phylogenetic tree and orthogene classifications were performed as described in the material and method section. Empty rectangles at the nodes denote the absence of gene from an ancestral node, shaded node denotes presence. The green bar represents gene gain or expansion, while the red bar represents gene loss or contraction at the node.

**Loganic acid O-methyl transferase (LAMT)**

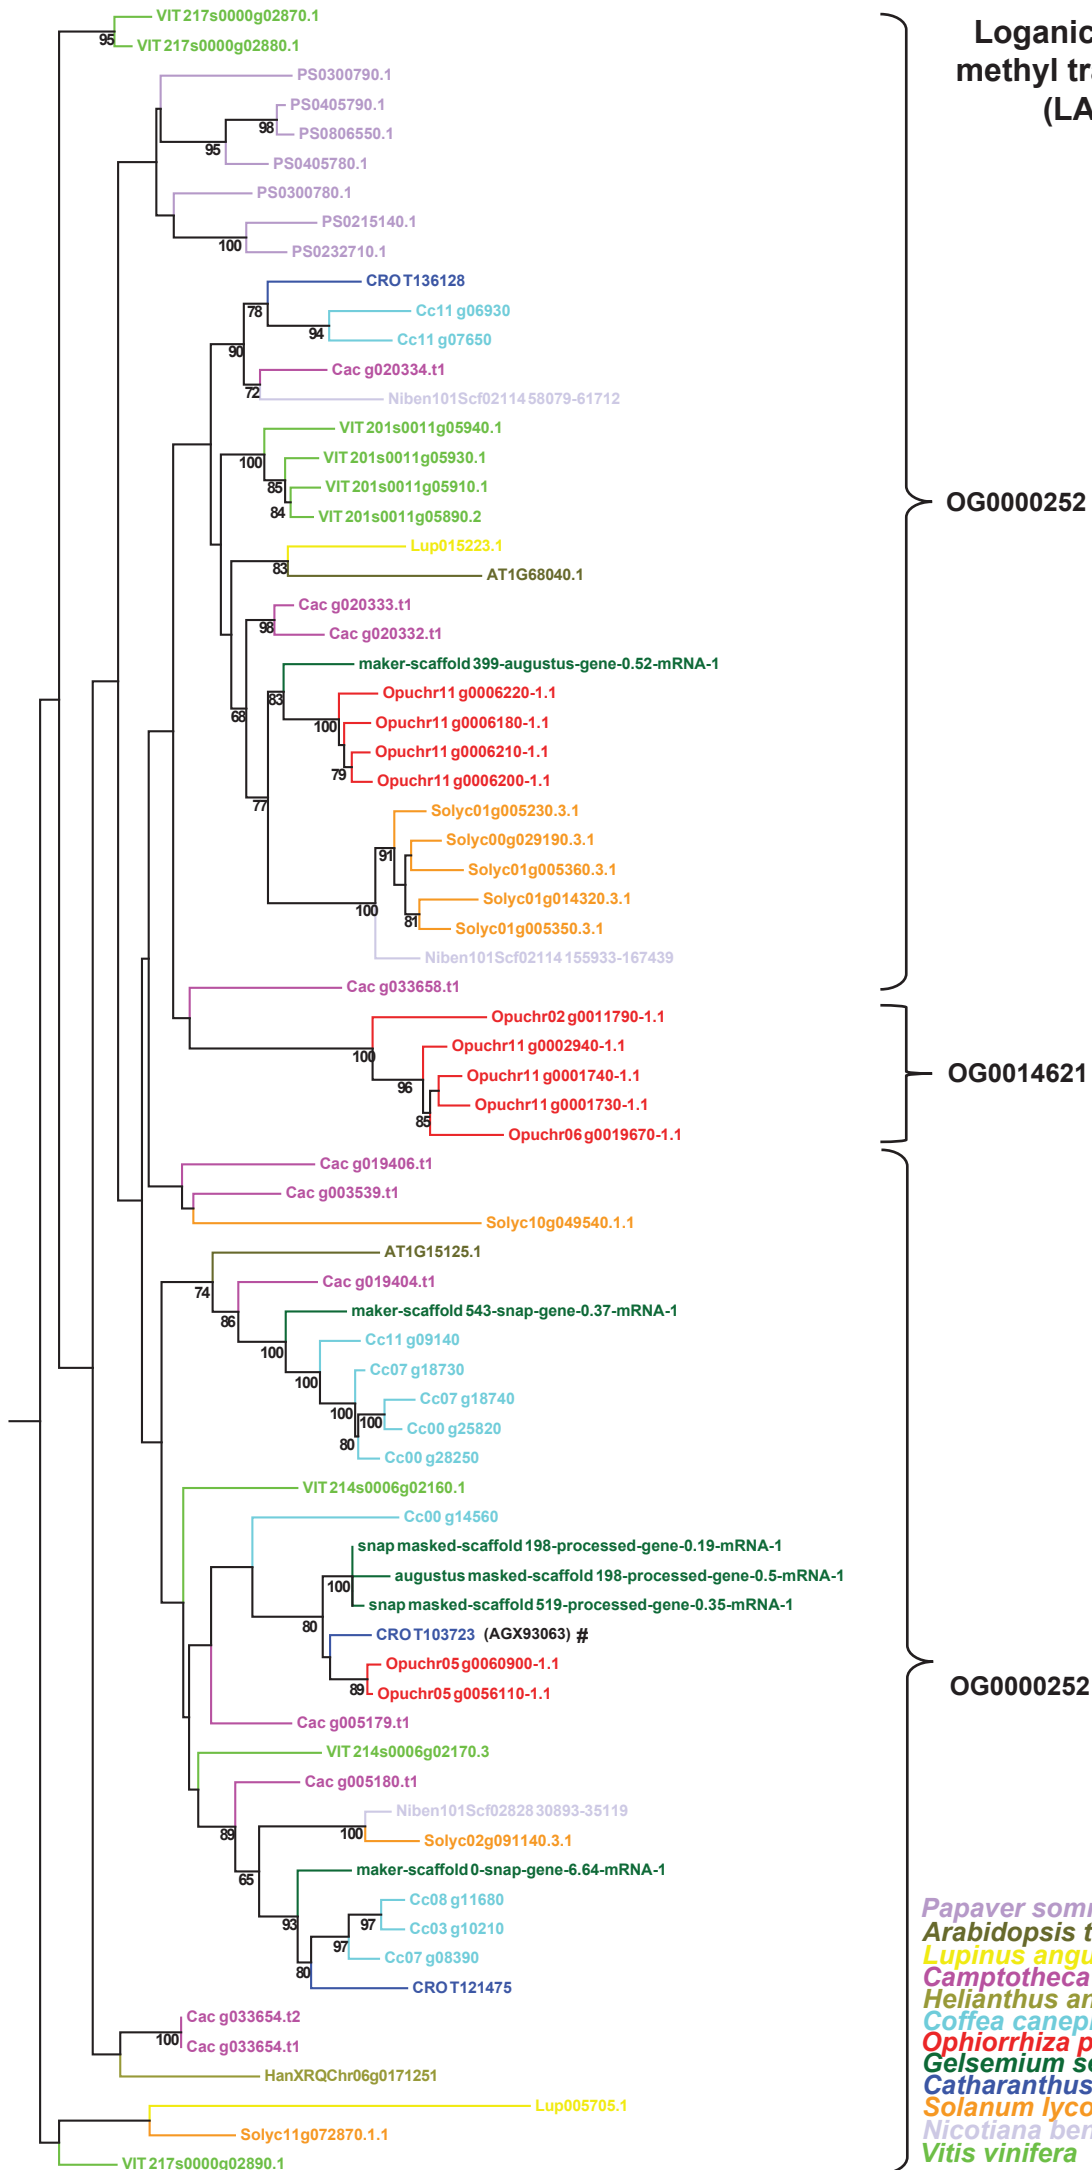

- Papaver somniferum*
- Arabidopsis thaliana*
- Lupinus angustifolius*
- Camptotheca accuminata*
- Helianthus annuus*
- Coffea canephora*
- Ophiorrhiza pumila*
- Gelsemium sempervirens*
- Catharanthus roseus*
- Solanum lycopersicum*
- Nicotiana bentimiana*
- Vitis vinifera*

**Supplementary Fig. 30. Phylogenetic analysis of loganic acid O-methyltransferase (LAMT) assigned to the orthogene families, OG0000252 and OG0014621.** Gene family classification was performed based on 13 plant genomes, and the genes are colored based on the associated plant species. Functionally characterized genes are represented by "#" with the GenBank accession IDs. Strongly supported nodes with bootstrap value above 60% are shown.

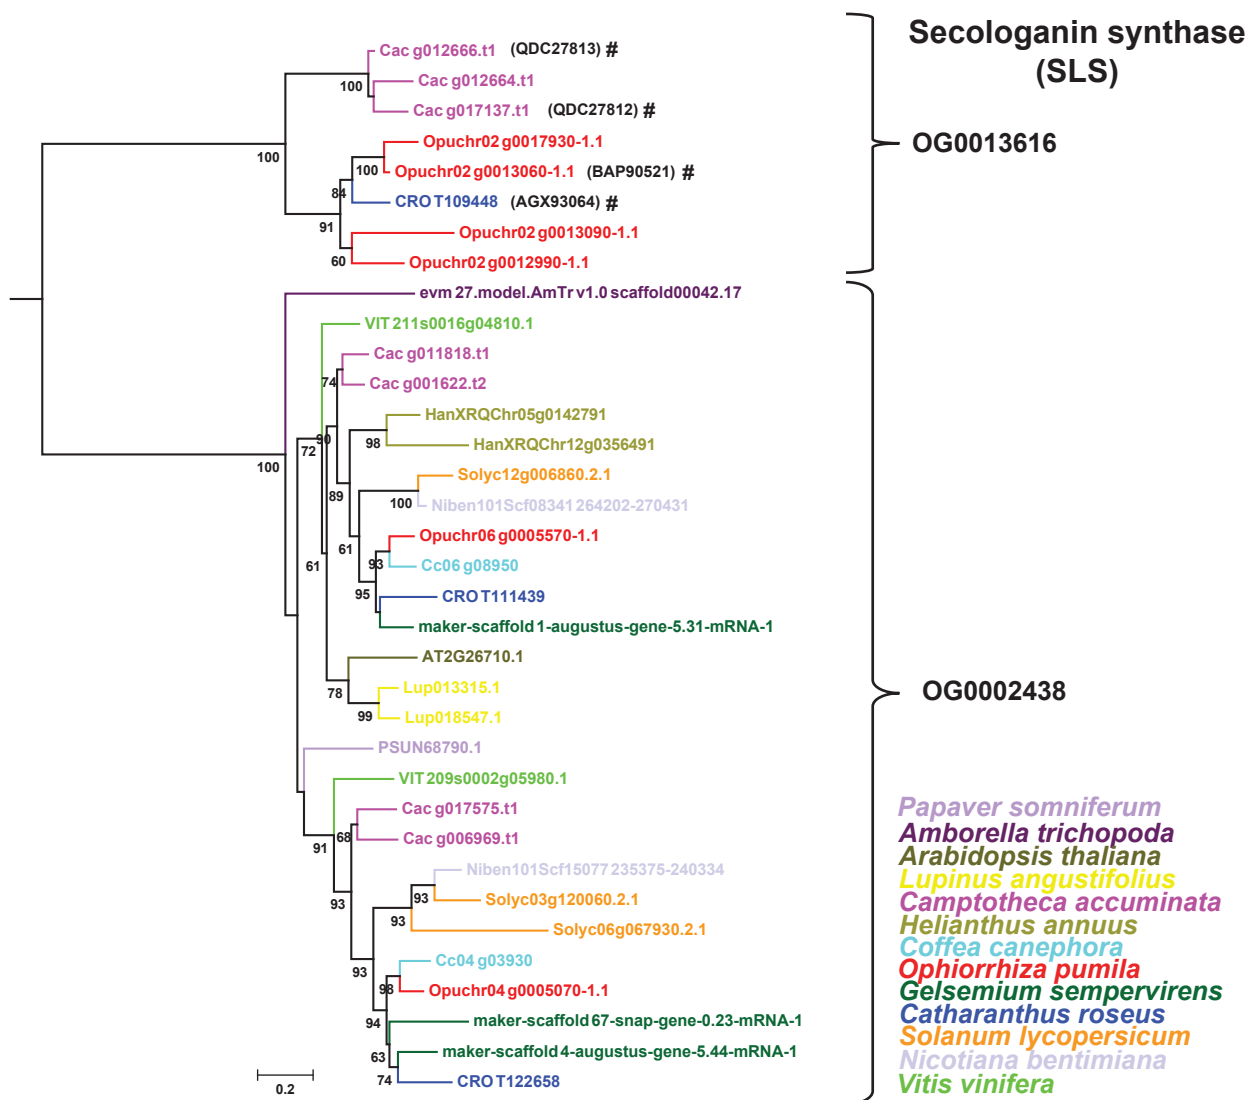

**Supplementary Fig. 31. Phylogenetic analysis of secologanin synthase (SLS) assigned to the orthogene families, OG0002438 and OG0013616.** Gene family classification was performed based on 13 plant genomes, and the genes are colored based on the associated plant species. Functionally characterized genes are represented by "#" with the GenBank accession IDs. Strongly supported nodes with bootstrap value above 60% are shown.



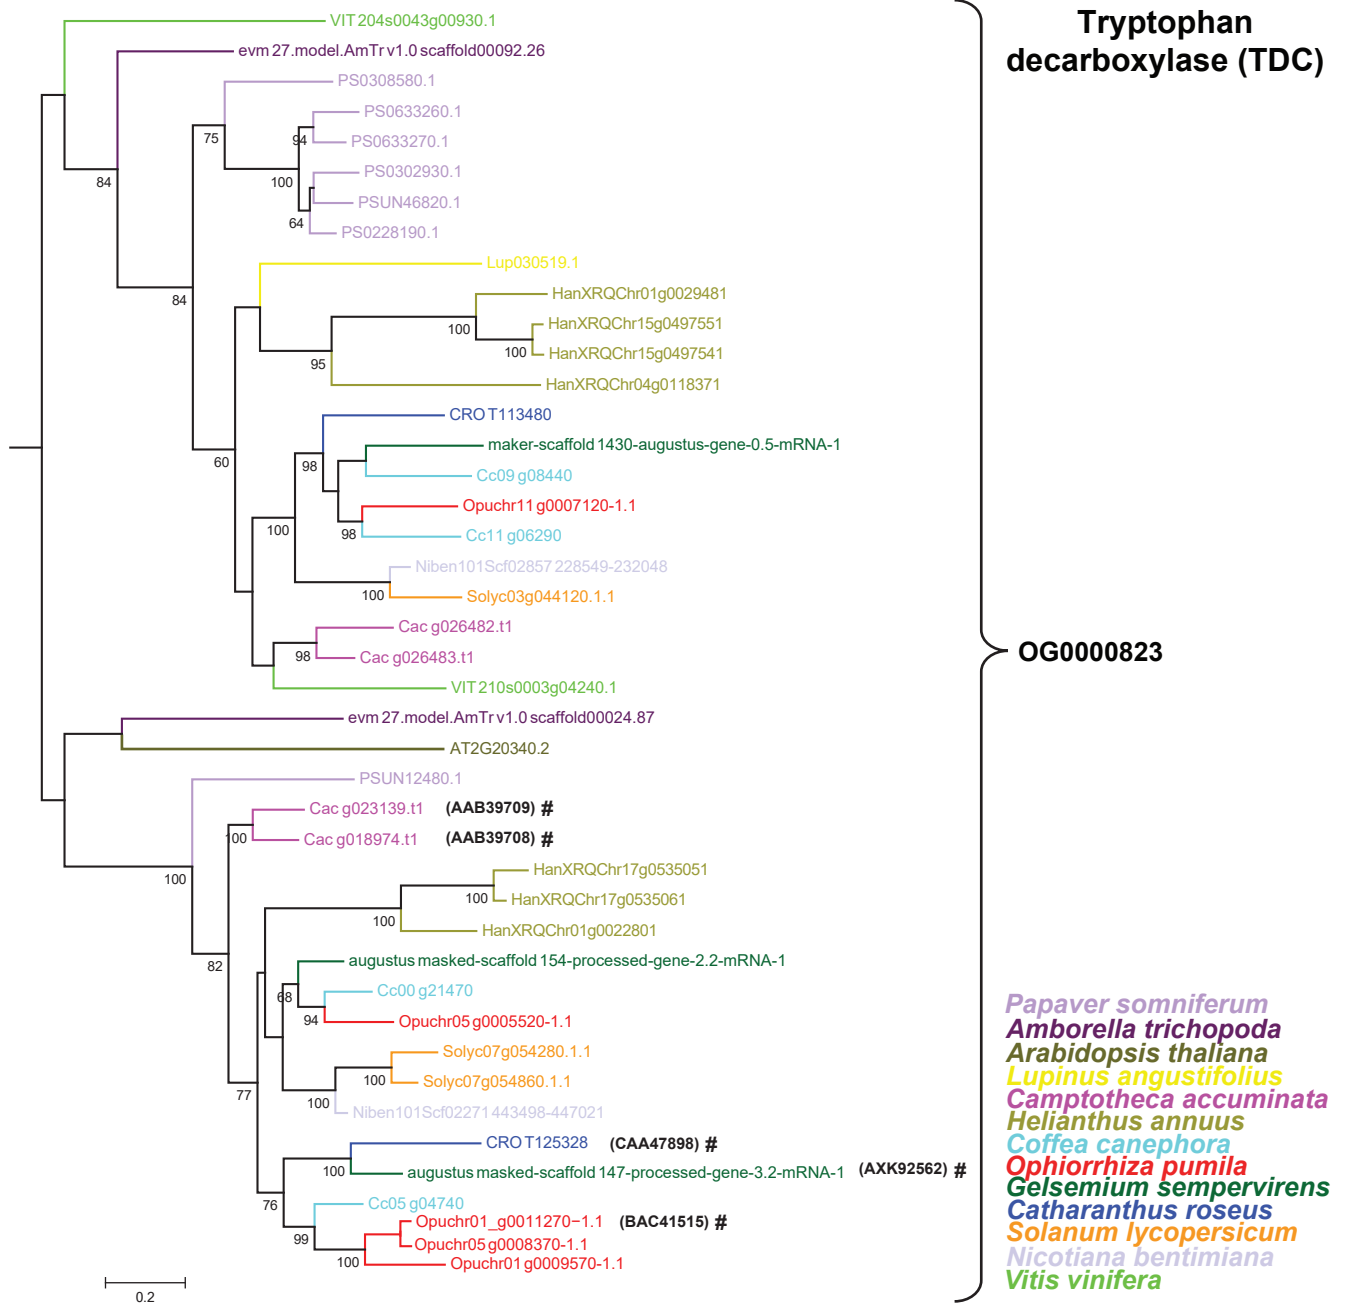

**Supplementary Fig. 32. Phylogenetic analysis of tryptophan decarboxylase (TDC) assigned to the orthogene family OG0000823.** Gene family classification was performed based on 13 plant genomes, and the genes are colored based on the associated plant species. Functionally characterized genes are represented by "#" with the GenBank accession IDs. Strongly supported nodes with bootstrap value above 60% are shown.

Strictosidine synthase (STR)

OG0015245

OG0000148

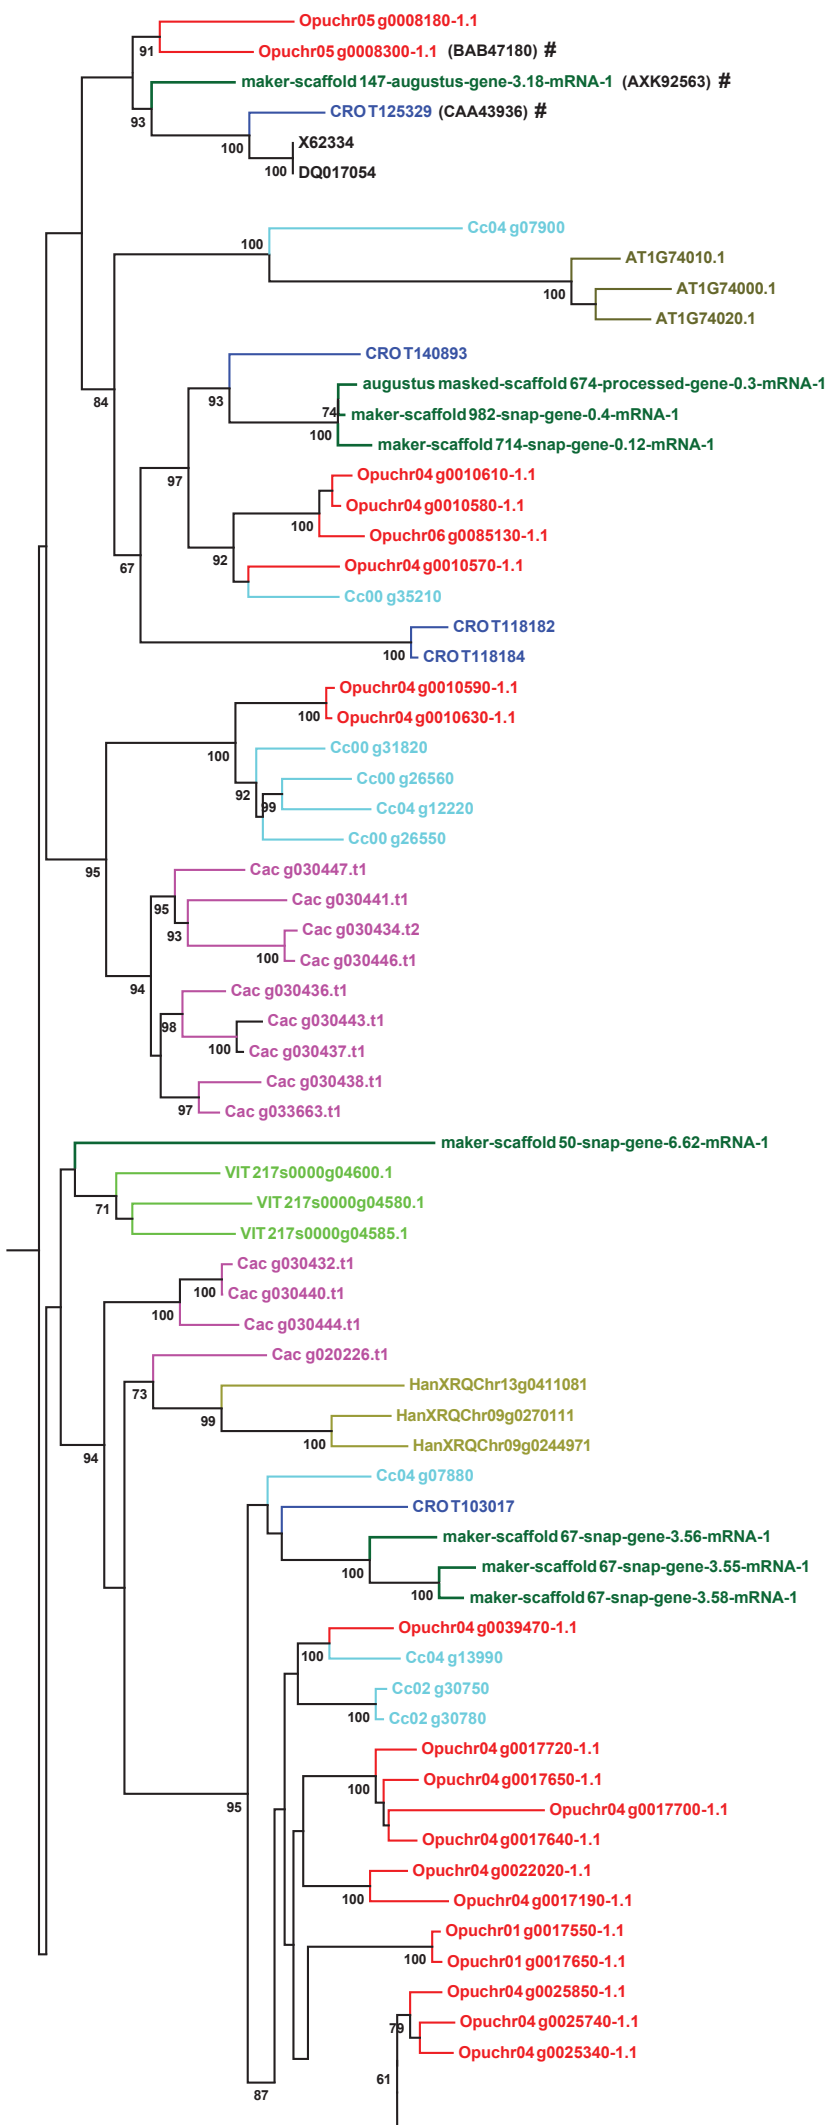

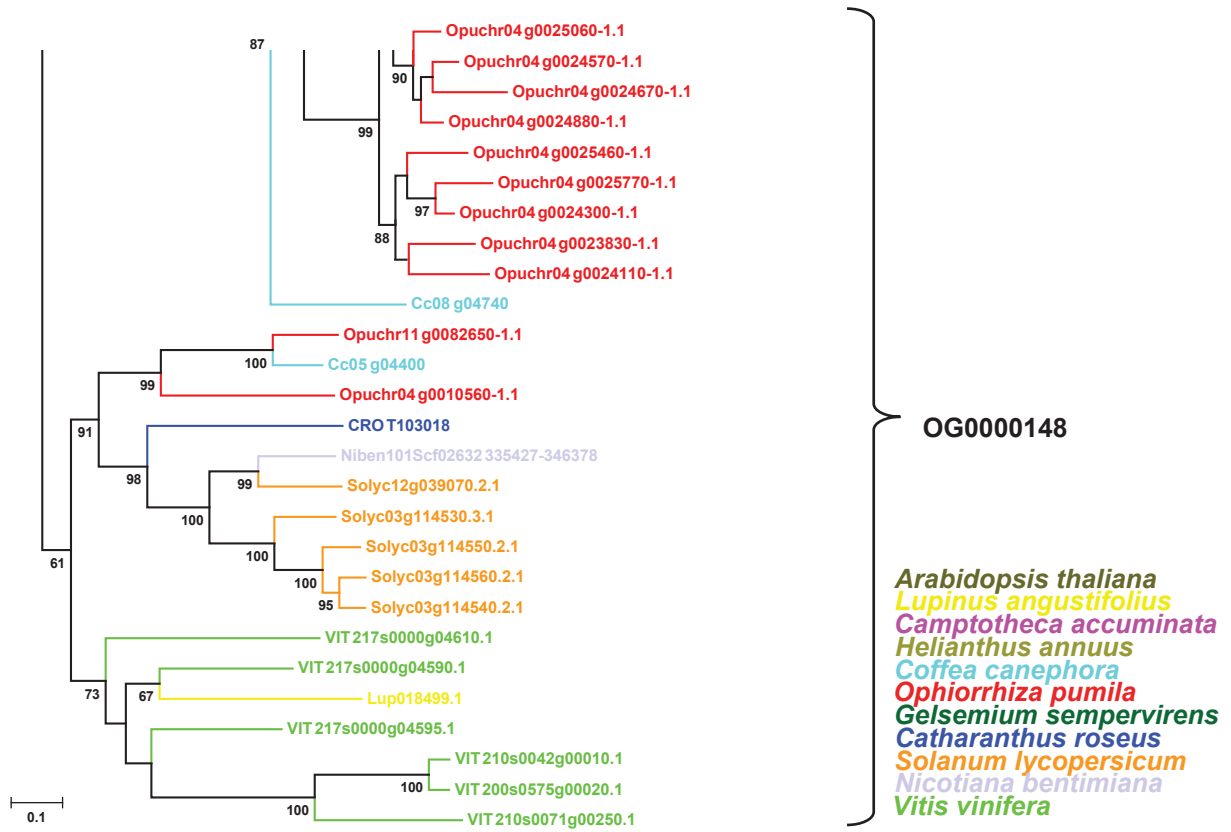

**Supplementary Fig. 33. Phylogenetic analysis of strictosidine synthase (STR) assigned to the orthogene families, OG0000148 and OG0015245.** Gene family classification was performed based on 13 plant genomes, and the genes are colored based on the associated plant species. Functionally characterized genes are represented by "#" with the GenBank accession IDs. Strongly supported nodes with bootstrap value above 60% are shown.

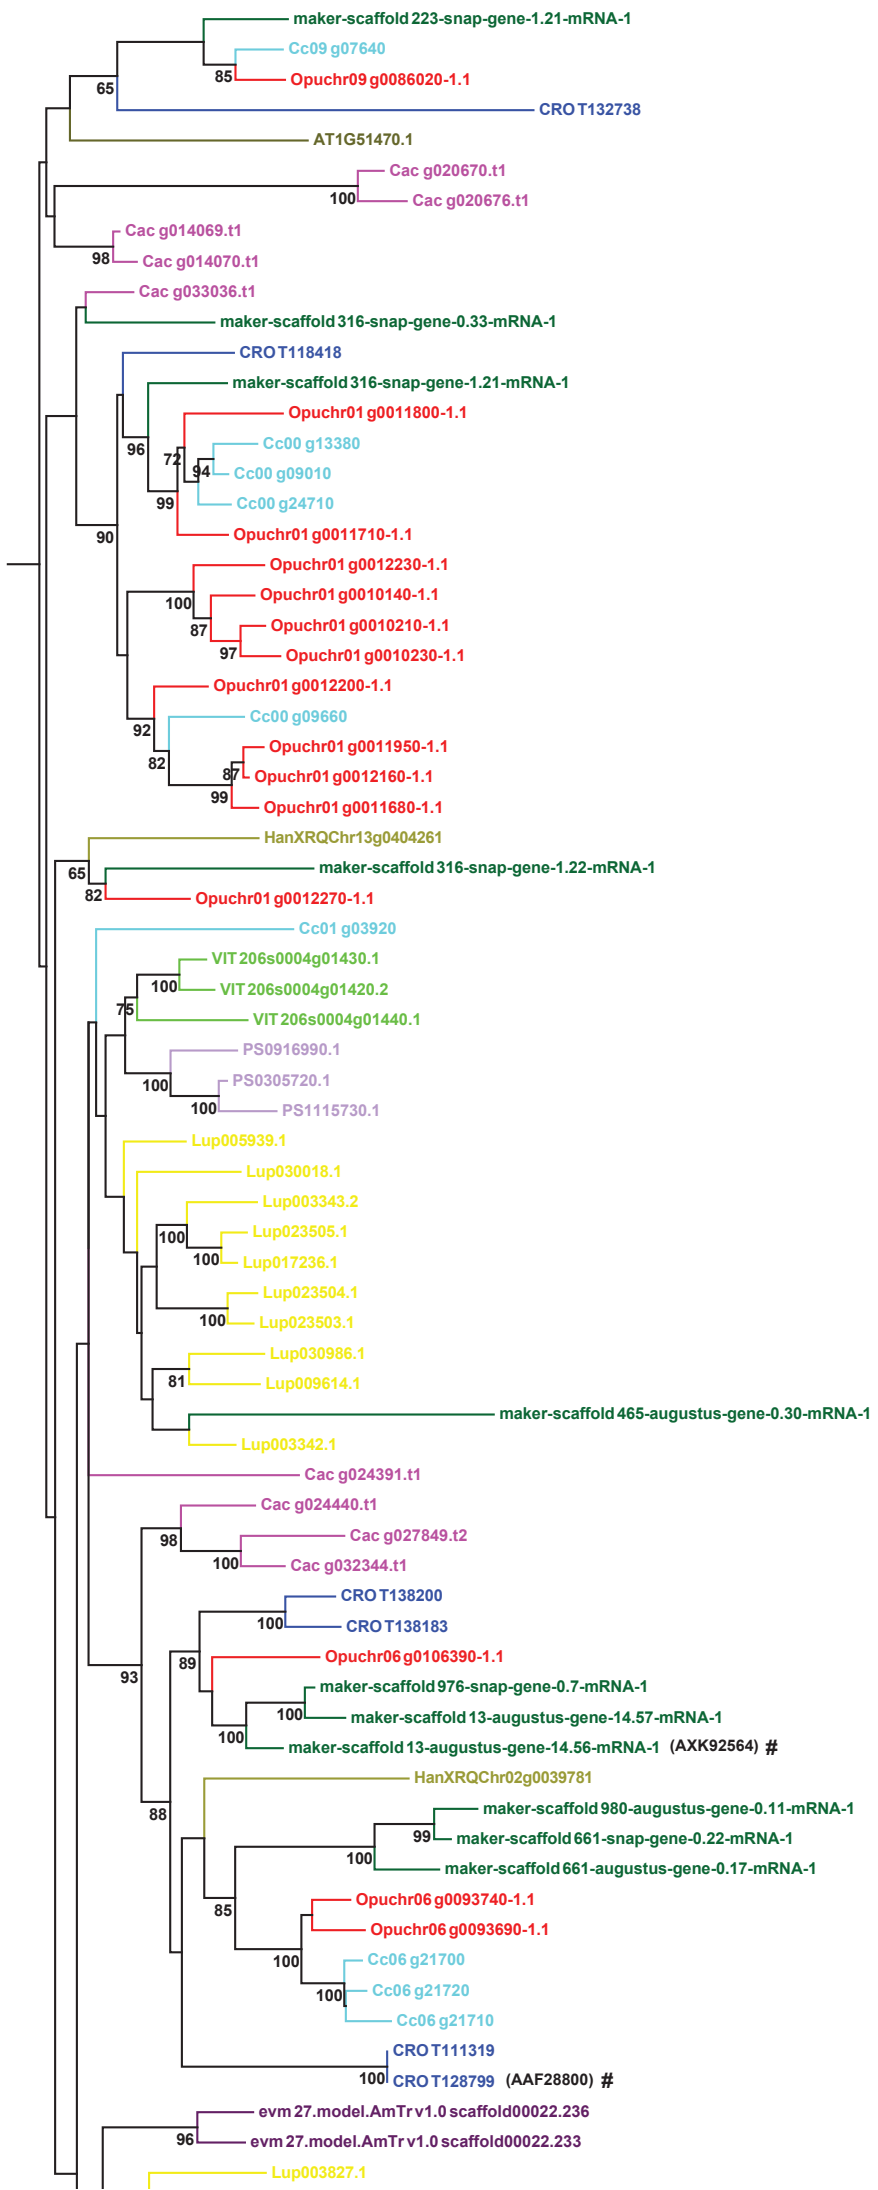

OG0016082

Strictosidine beta-D-glucosidase (SGD)

OG0000057

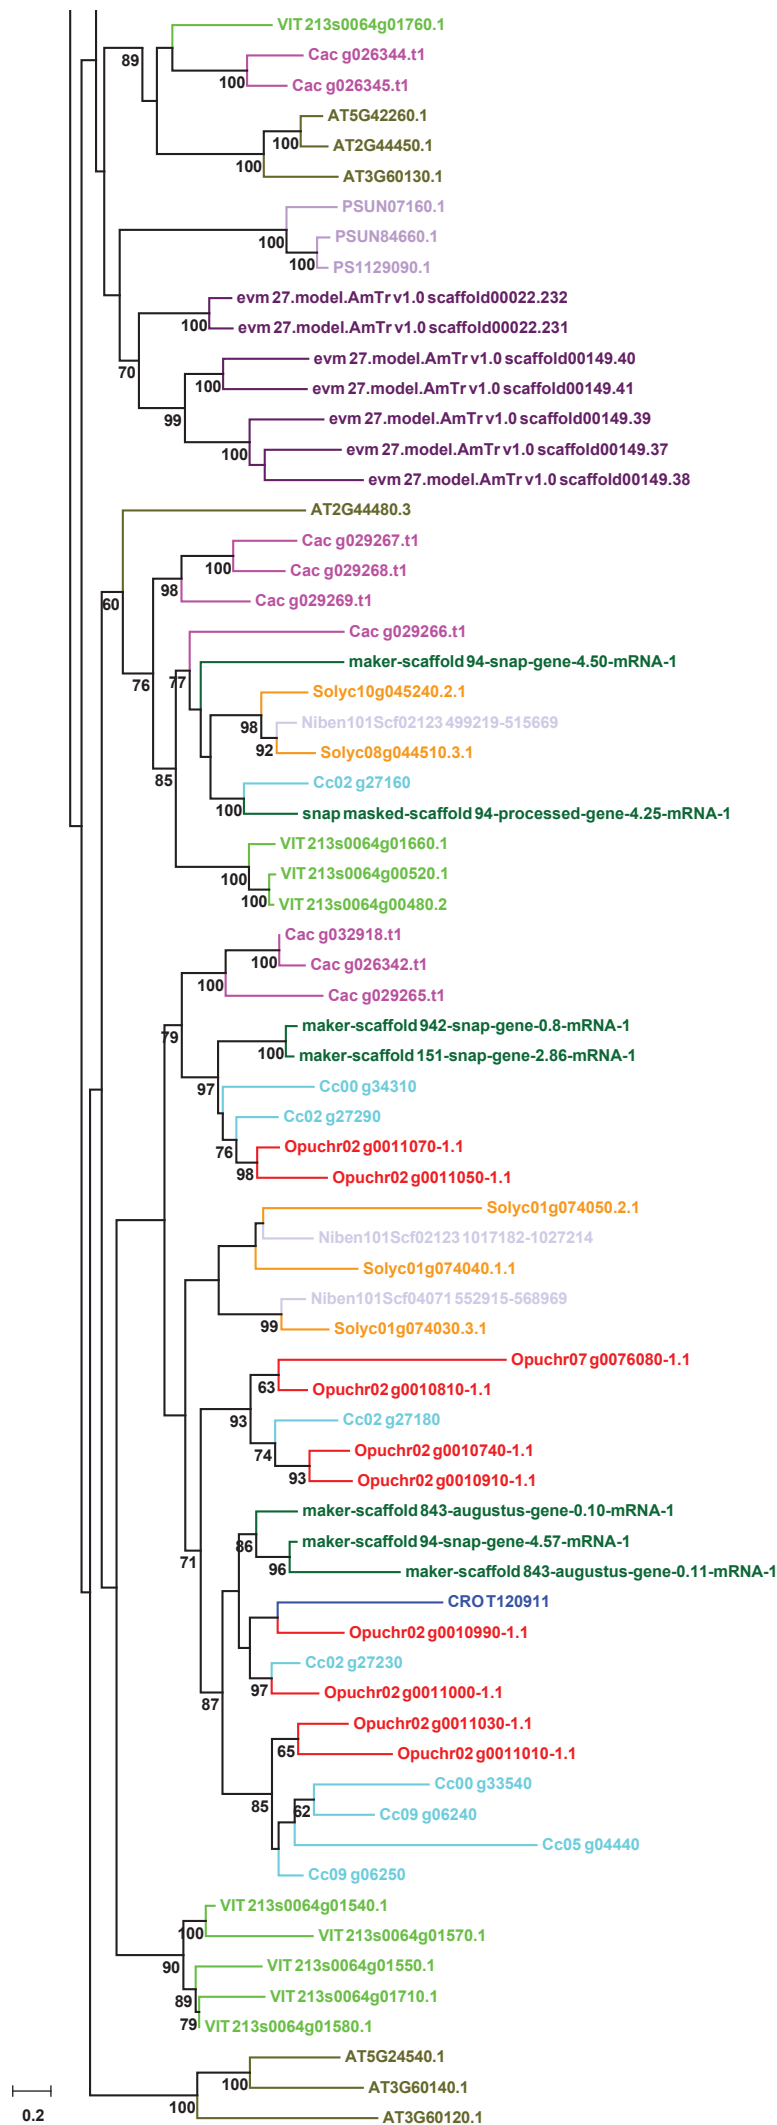

OG000057

*Papaver somniferum*  
*Amborella trichopoda*  
*Arabidopsis thaliana*  
*Lupinus angustifolius*  
*Camptotheca accuminata*  
*Helianthus annuus*  
*Coffea canephora*  
*Ophiorrhiza pumila*  
*Gelsemium sempervirens*  
*Catharanthus roseus*  
*Solanum lycopersicum*  
*Nicotiana benthamiana*  
*Vitis vinifera*

**Supplementary Fig. 34. Phylogenetic analysis of strictosidine beta-D-glucosidase (SGD) assigned to the orthogene families, OG000057 and OG0016082.** Gene family classification was performed based on 13 plant genomes, and the genes are colored based on the associated plant species. Functionally characterized genes are represented by "#" with the GenBank accession IDs. Strongly supported nodes with bootstrap value above 60% are shown.

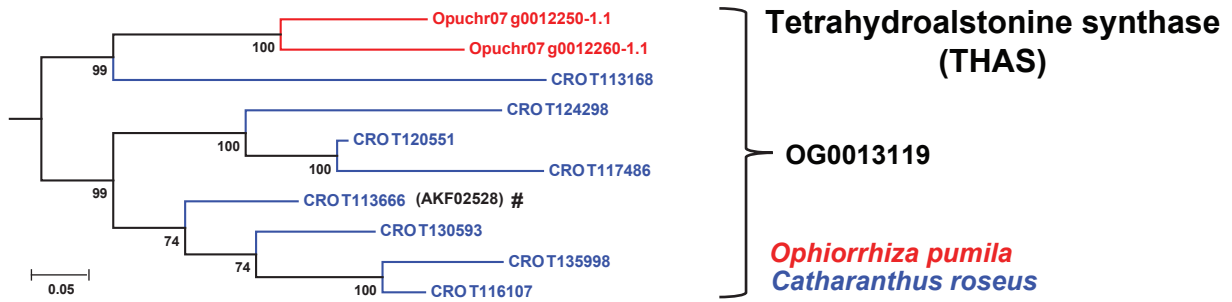

**Supplementary Fig. 35. Phylogenetic analysis of tetrahydroalstonine synthase (THAS) assigned to the orthogene family, OG0013119.** Gene family classification was performed based on 13 plant genomes, and the genes are colored based on the associated plant species. Functionally characterized genes are represented by "#" with the GenBank accession IDs. Strongly supported nodes with bootstrap value above 60% are shown.

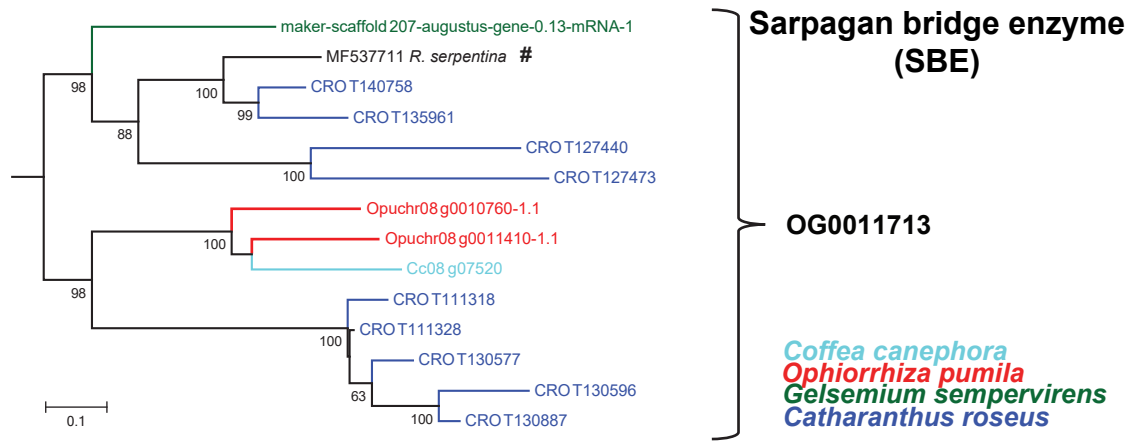

**Supplementary Fig. 36. Phylogenetic analysis of sarpagan bridge enzyme (SBE) assigned to the orthogene family, OG0011713.** Gene family classification was performed based on 13 plant genomes, and the genes are colored based on the associated plant species. Functionally characterized genes are represented by "#" with the GenBank accession IDs. Strongly supported nodes with bootstrap value above 60% are shown.



**Tabersonine-19-hydroxy-O-acetyltransferase (T19AT)**

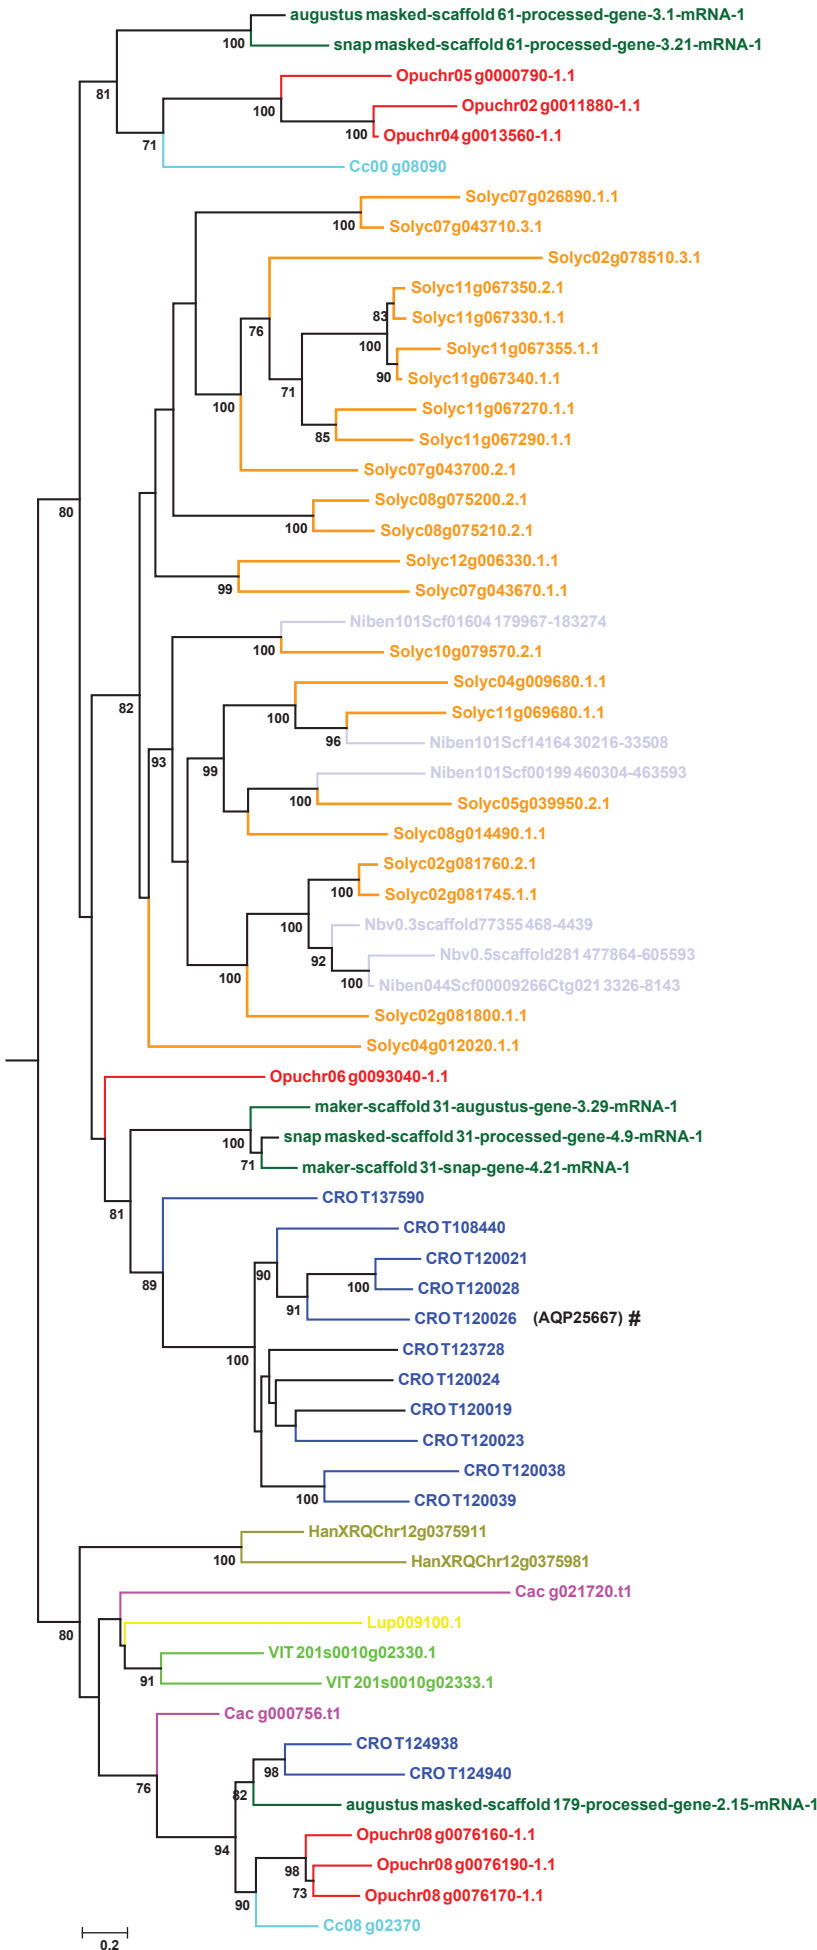

**OG0000291**

- Lupinus angustifolius*
- Camptotheca accuminata*
- Helianthus annuus*
- Coffea canephora*
- Ophiorrhiza pumila*
- Gelsemium sempervirens*
- Catharanthus roseus*
- Solanum lycopersicum*
- Nicotiana bentimiana*
- Vitis vinifera*

**Supplementary Fig. 37. Phylogenetic analysis of tabersonine-19-hydroxy-O-acetyltransferase (T19AT) assigned to the orthogene family, OG0000291.** Gene family classification was performed based on 13 plant genomes, and the genes are colored based on the associated plant species. Functionally characterized genes are represented by "#" with the GenBank accession IDs. Strongly supported nodes with bootstrap value above 60% are shown.

**Polyneuridine-  
aldehyde esterase  
(PNAE)**

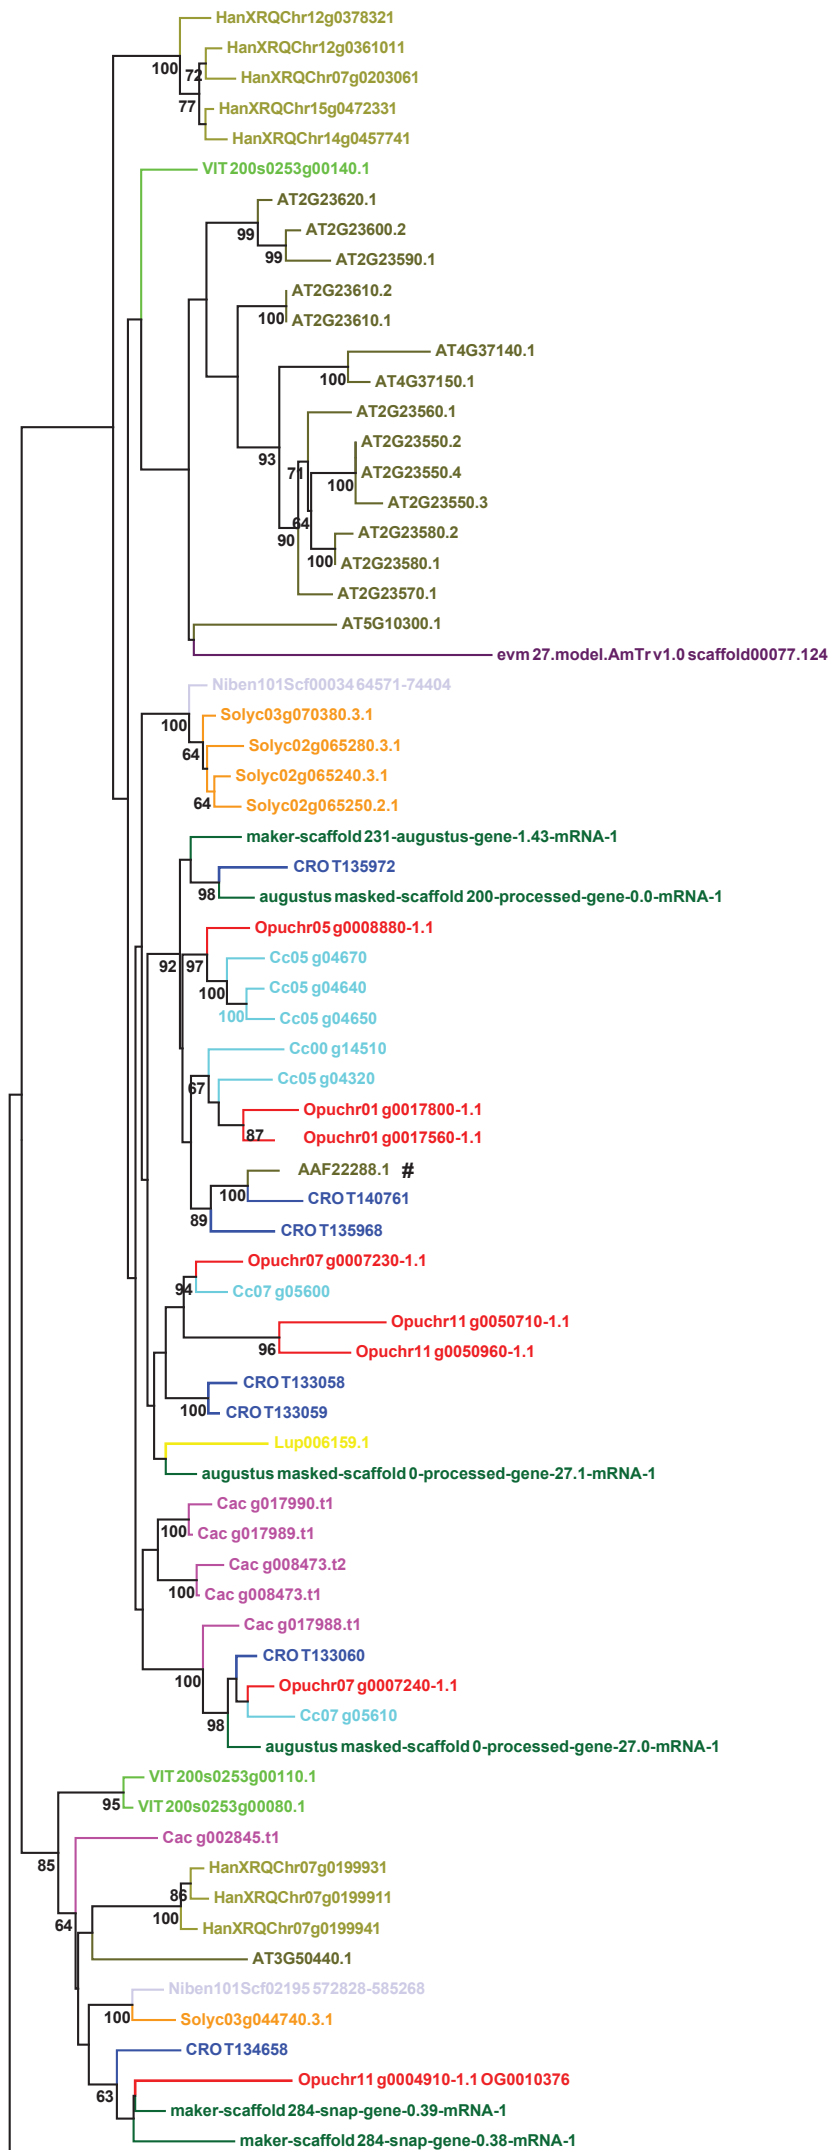

OG0000066

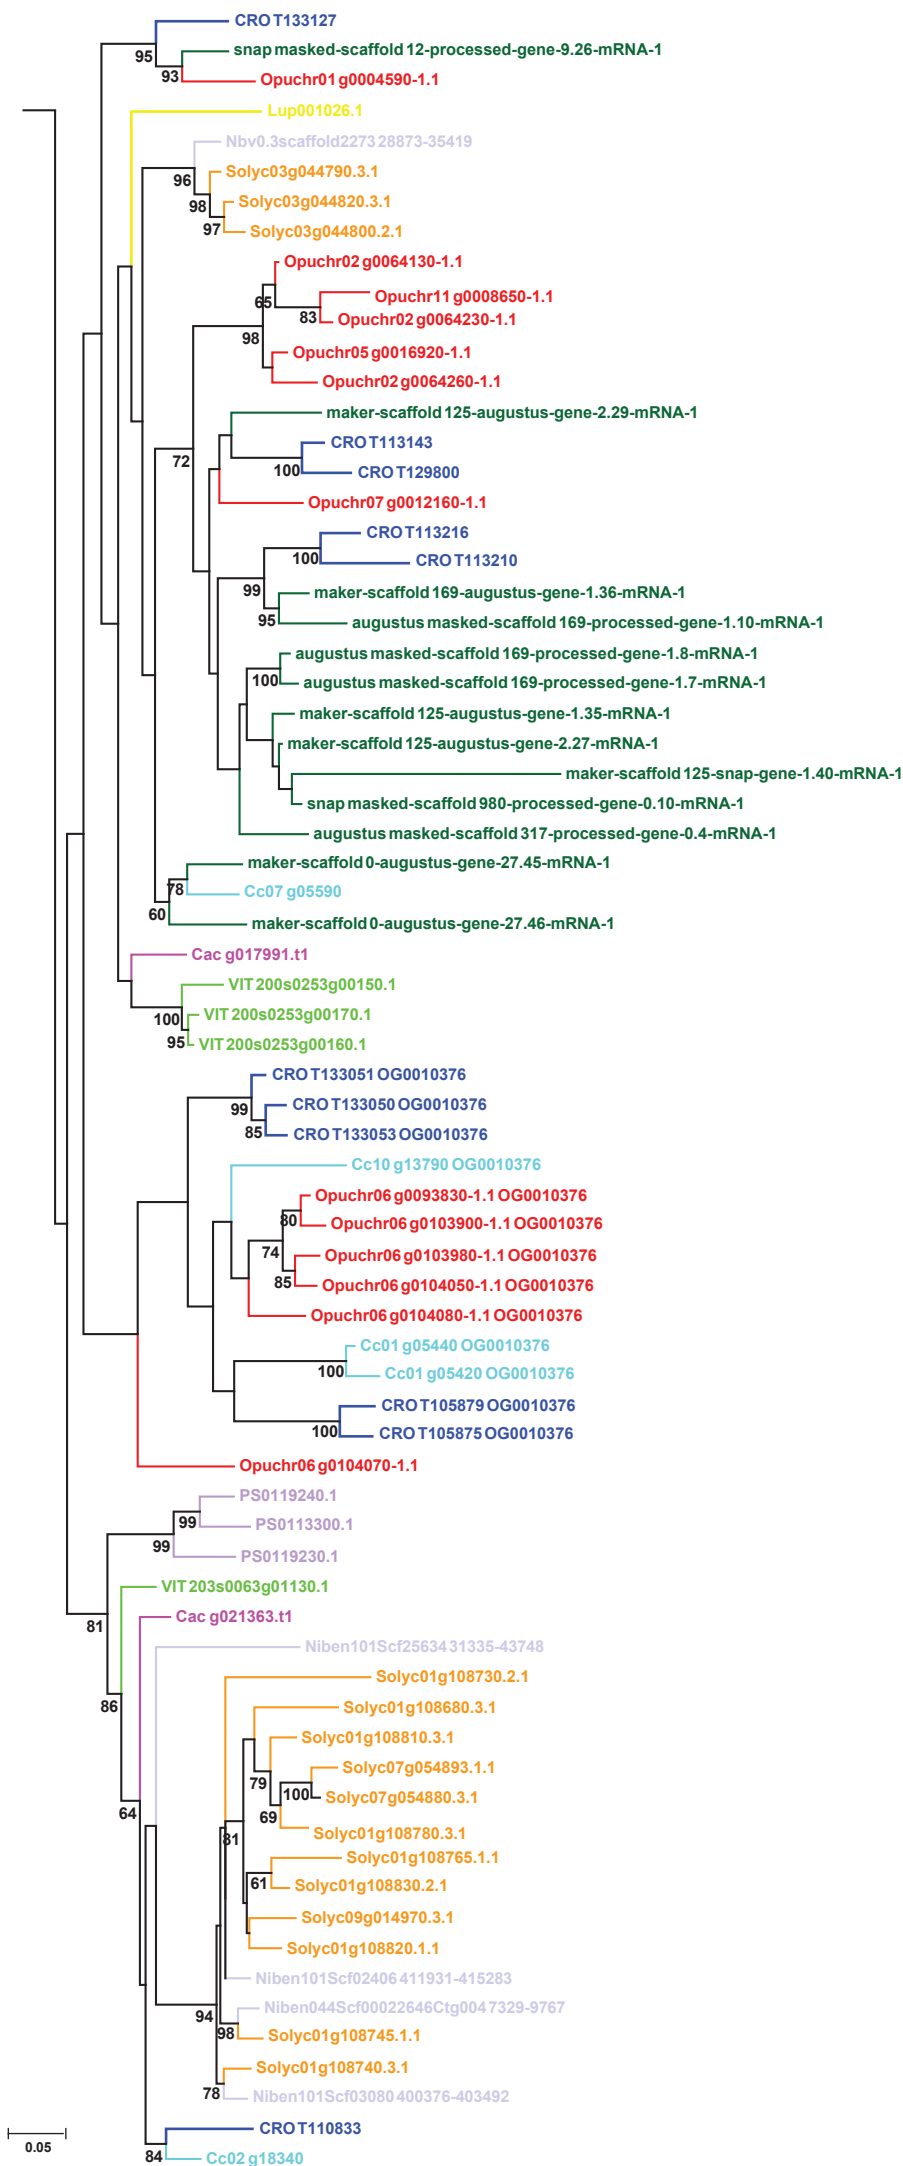

OG0000066

OG0010376

OG0000066

- Papaver somniferum*
- Amborella trichopoda*
- Arabidopsis thaliana*
- Lupinus angustifolius*
- Campotheca accuminata*
- Helianthus annuus*
- Coffea canephora*
- Ophiorrhiza pumila*
- Gelsemium sempervirens*
- Catharanthus roseus*
- Solanum lycopersicum*
- Nicotiana bentimiana*
- Vitis vinifera*

**Supplementary Fig. 38. Phylogenetic analysis of polyneuridine-aldehyde esterase (PNAE) assigned to the orthogene families, OG0000066 and OG0010376.** Gene family classification was performed based on 13 plant genomes, and the genes are colored based on the associated plant species. Functionally characterized genes are represented by "#" with the GenBank accession IDs. Strongly supported nodes with bootstrap value above 60% are shown.

O-acetylstemmadenine oxidase (ASO/PAS)

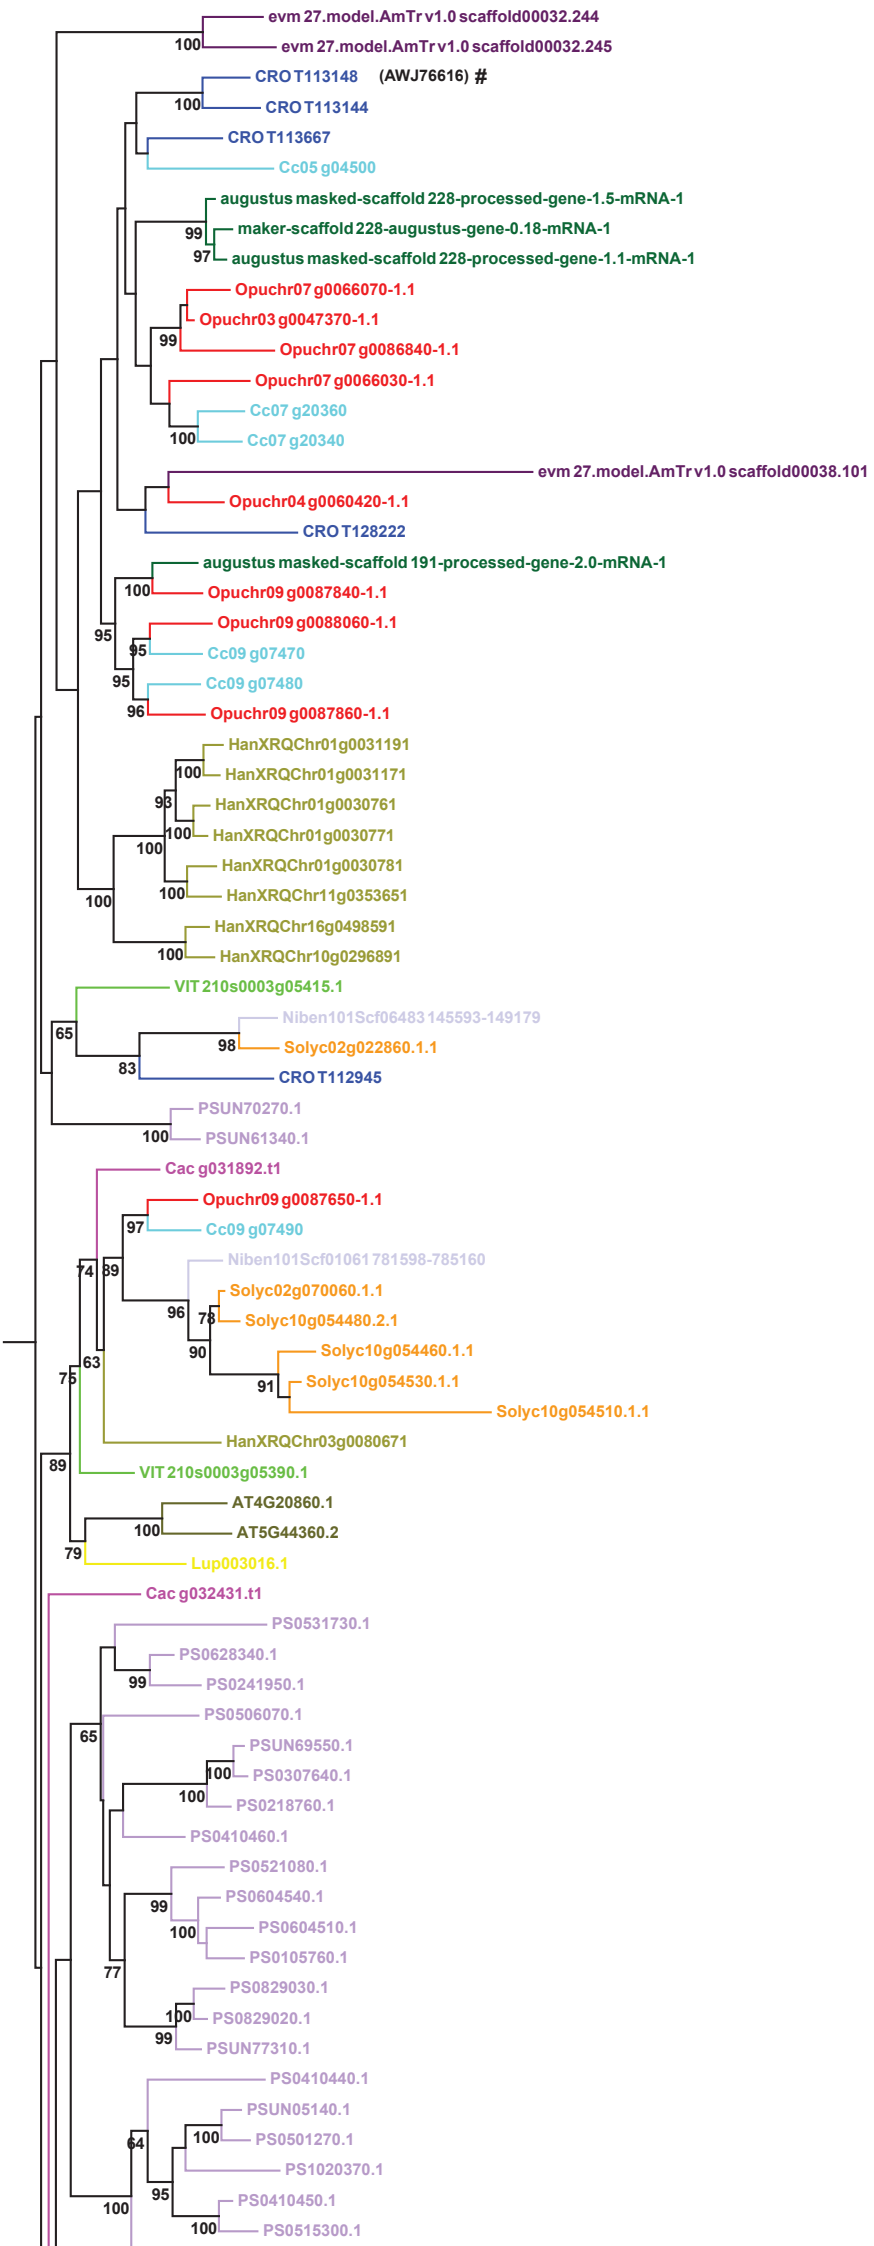

OG0000009

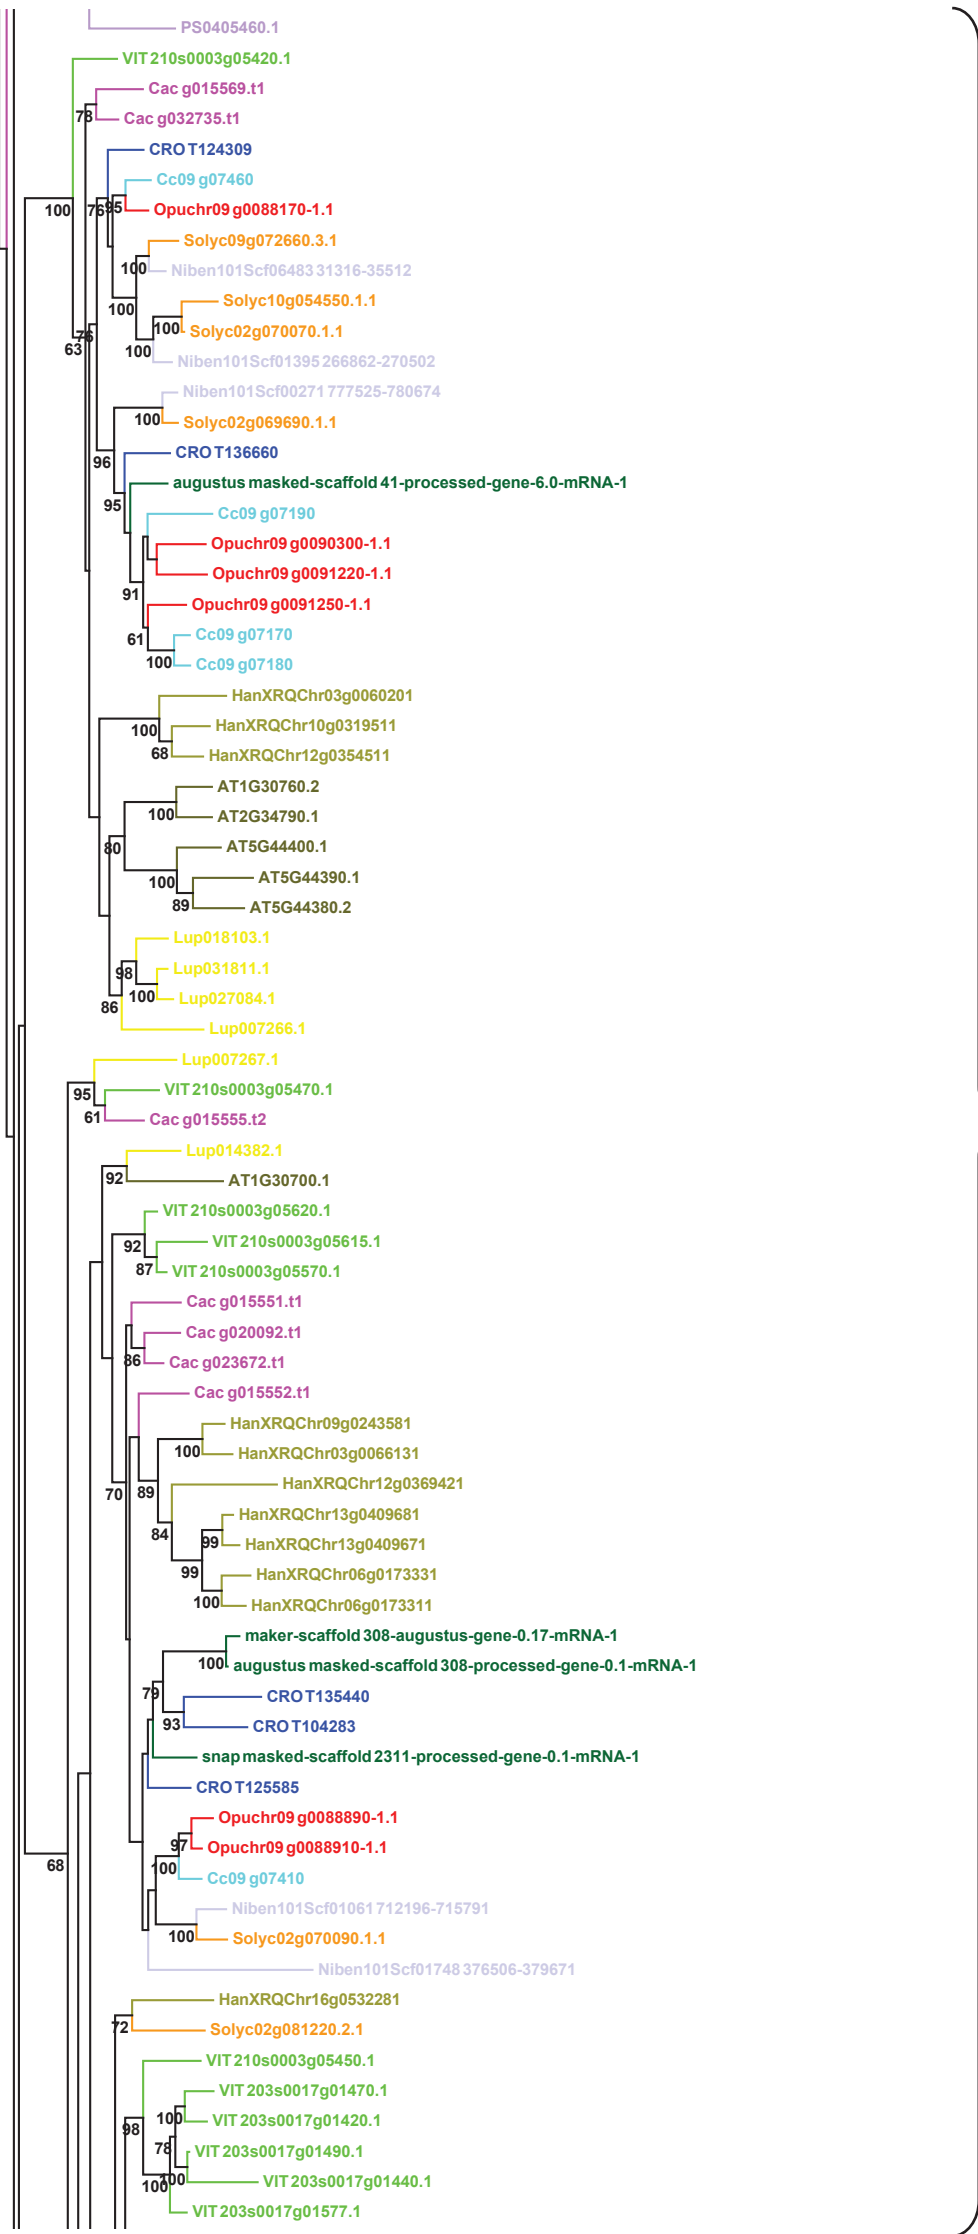

OG0000009

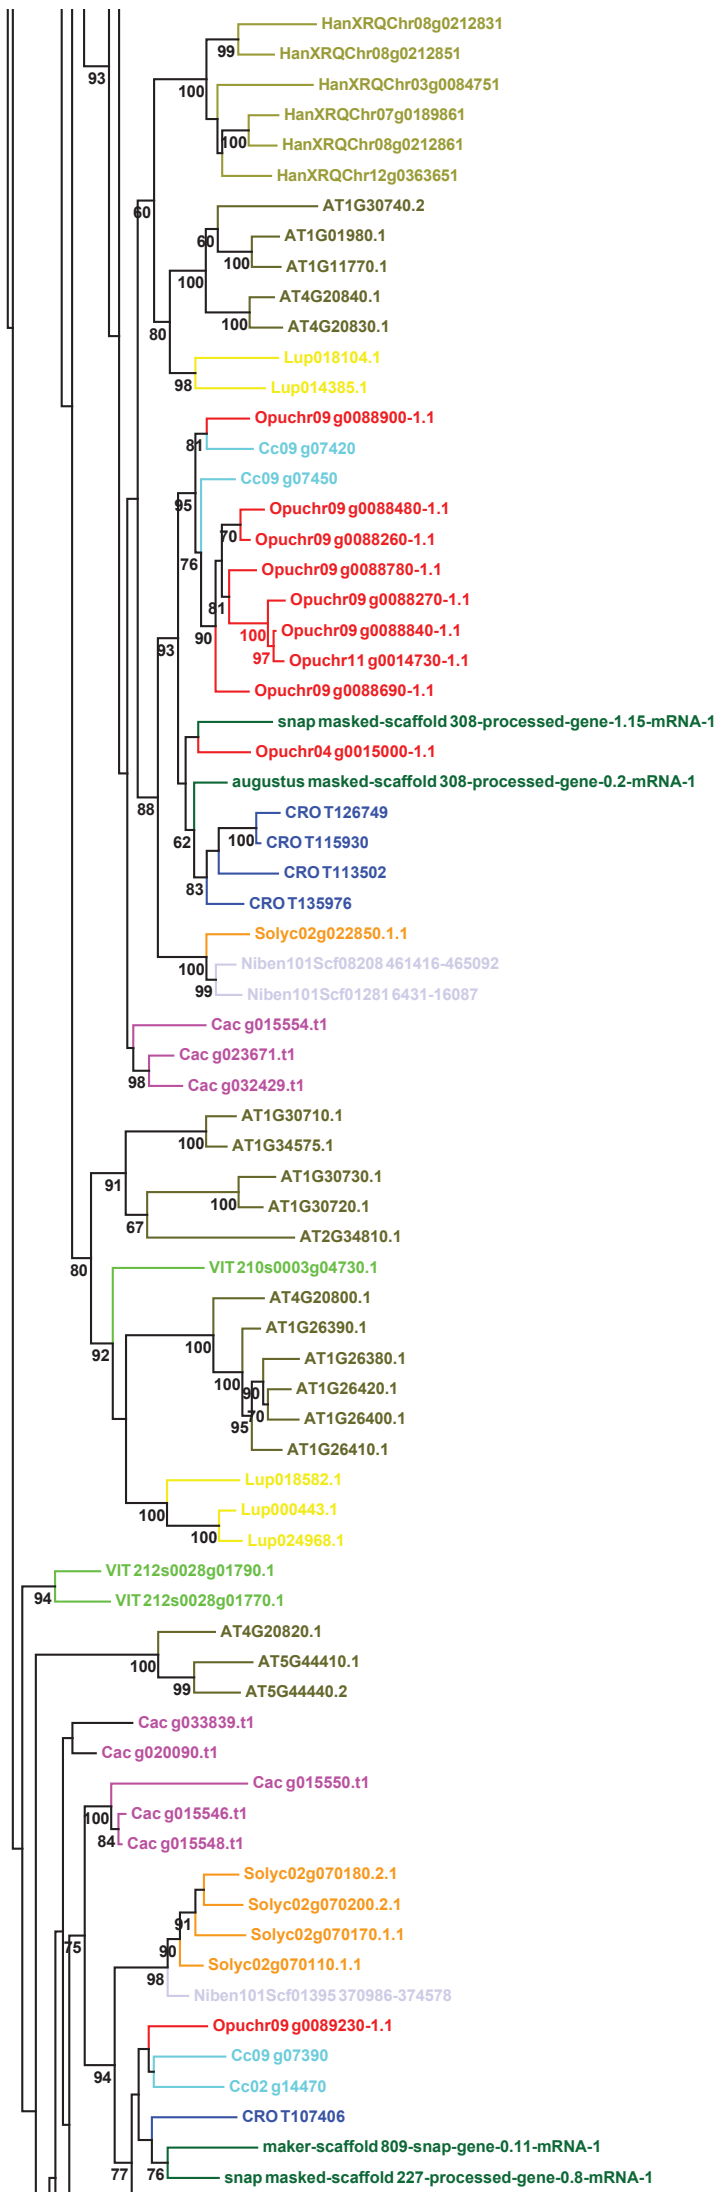

OG0000009



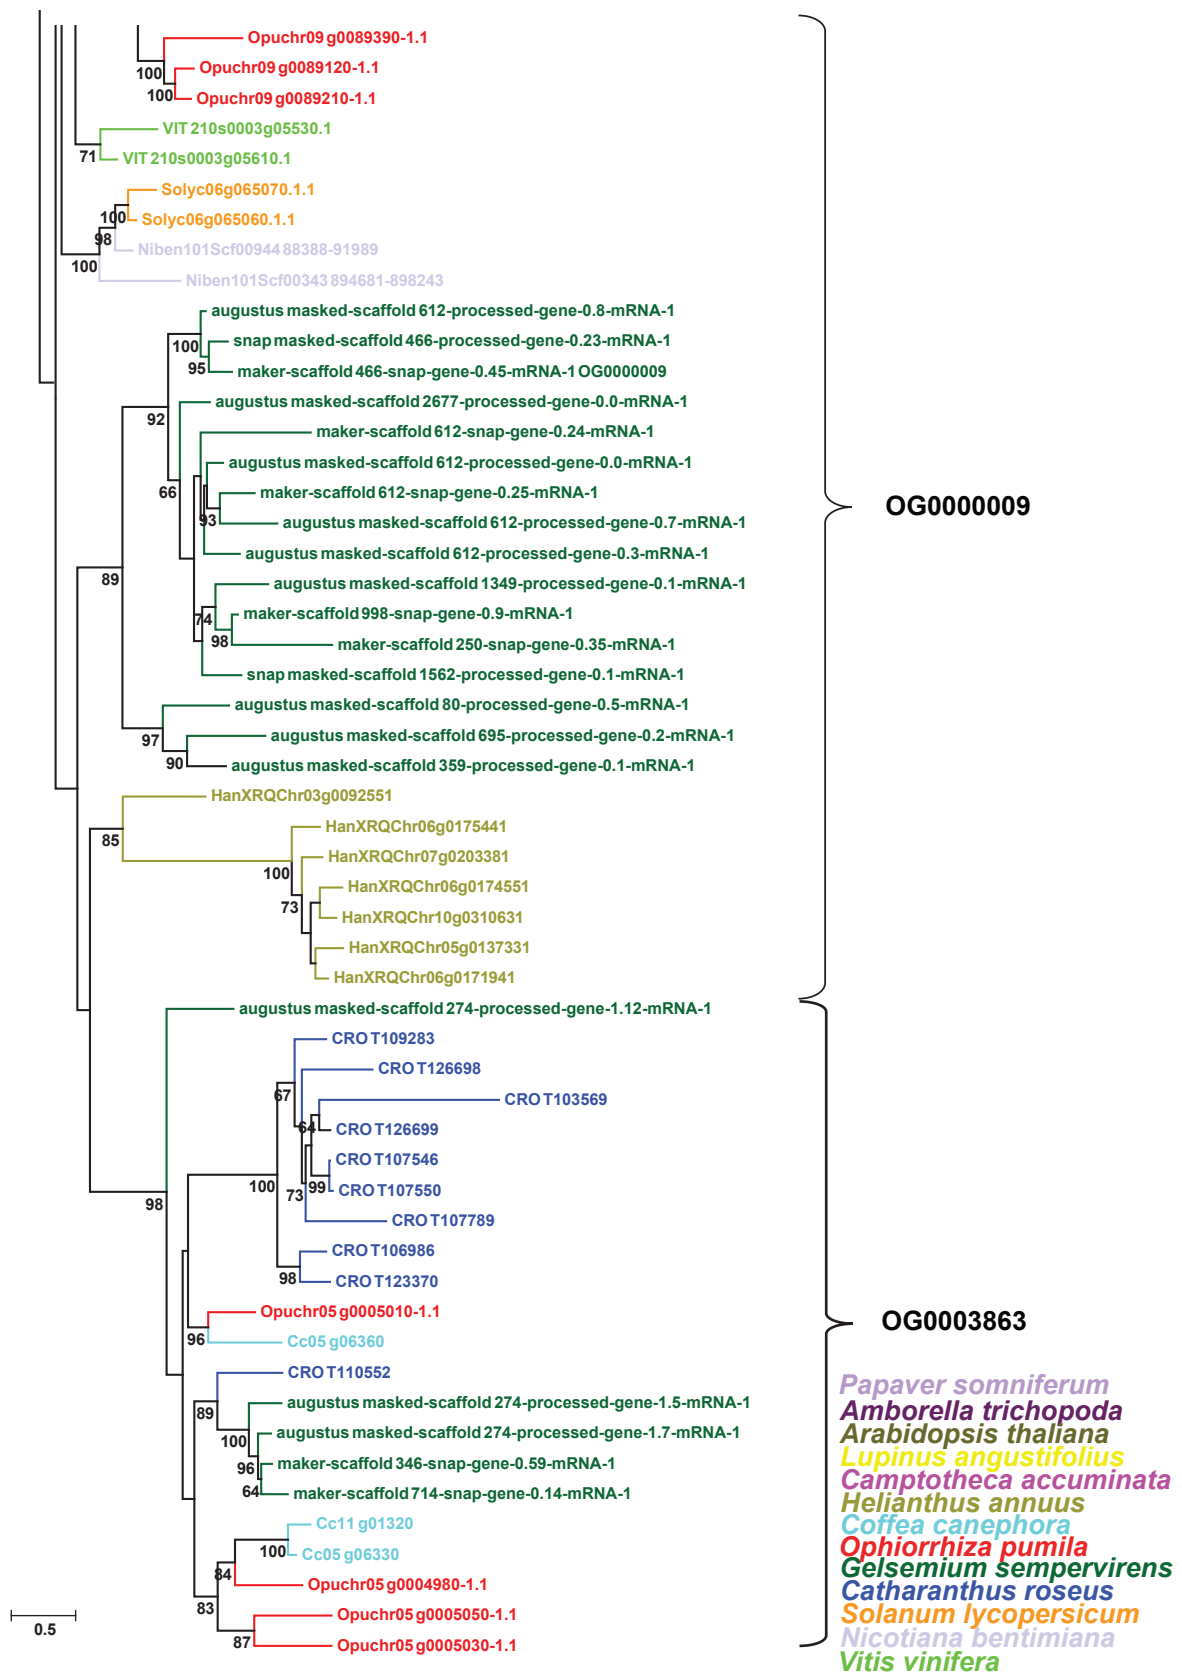

**Supplementary Fig. 39. Phylogenetic analysis of O-acetylstermaddenine oxidase (ASO/PAS) assigned to the orthogene families, OG000009 and OG0003863.** Gene family classification was performed based on 13 plant genomes, and the genes are colored based on the associated plant species. Functionally characterized genes are represented by "#" with the GenBank accession IDs. Strongly supported nodes with bootstrap value above 60% are shown.

Perakine reductase (PR)

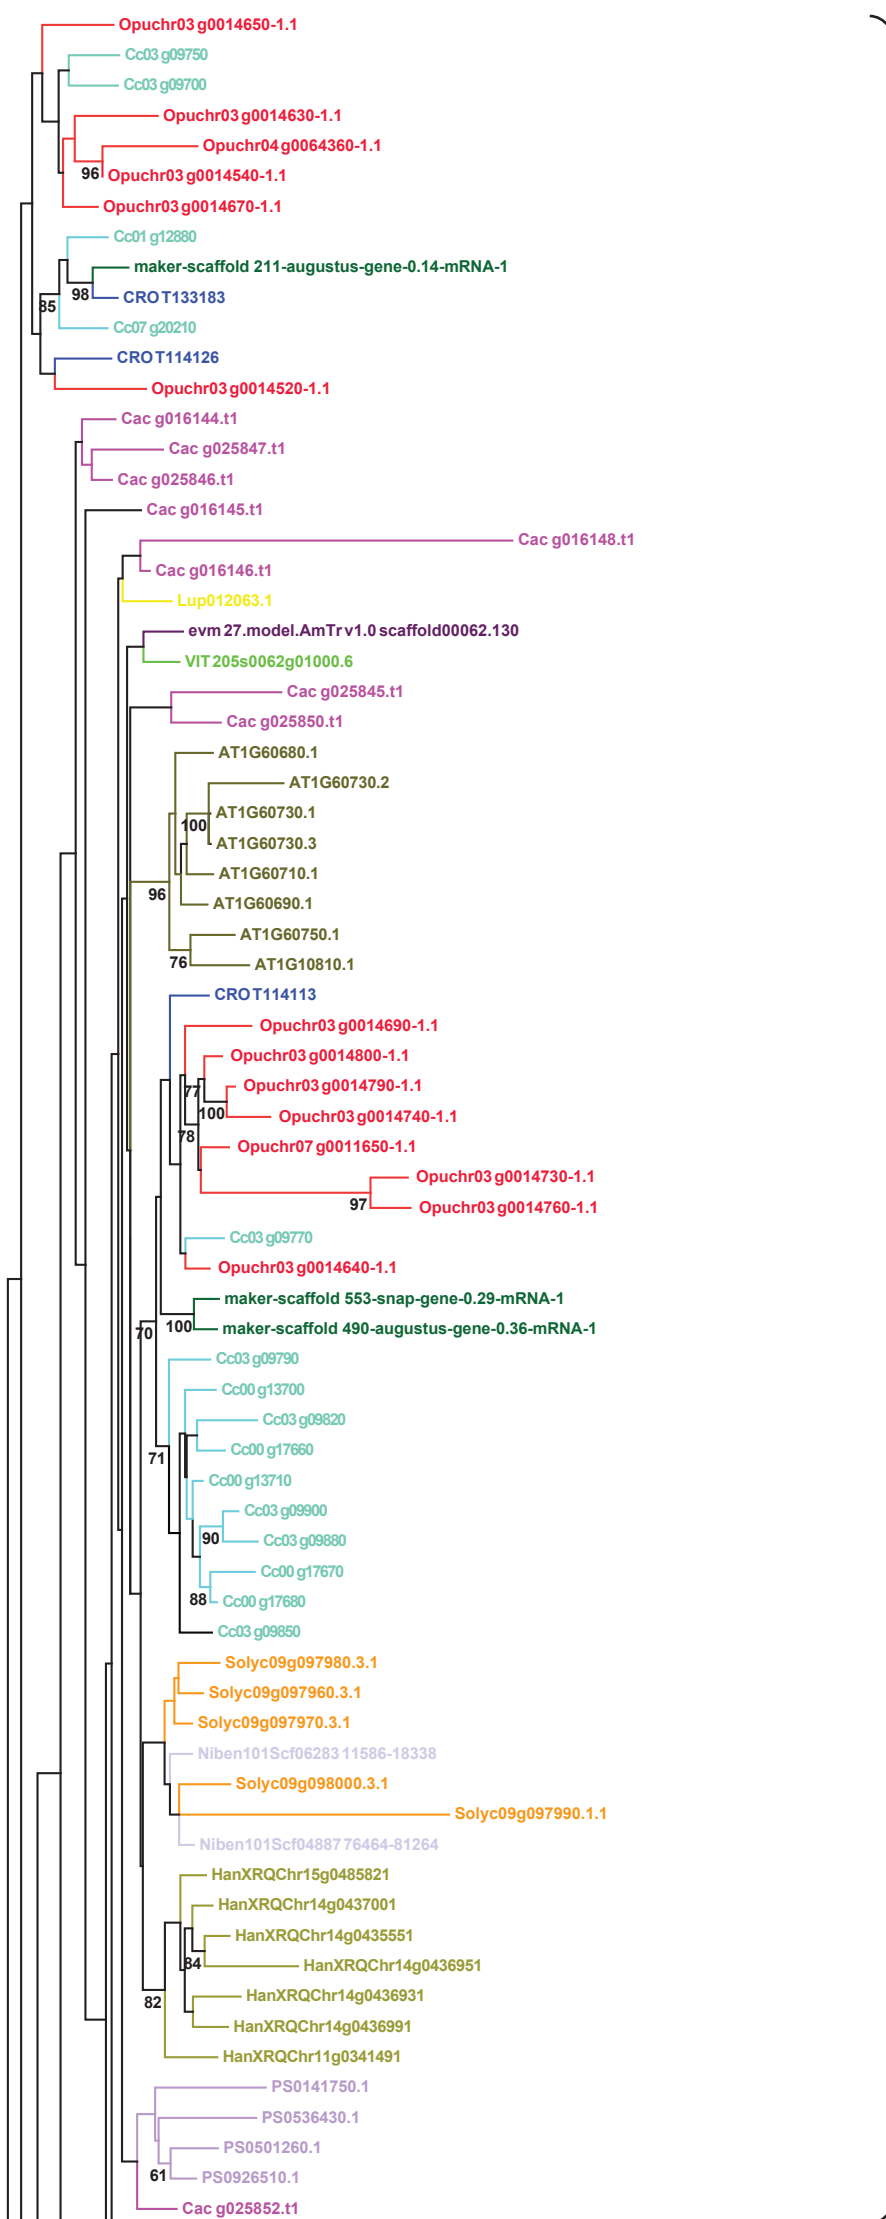

OG0000154

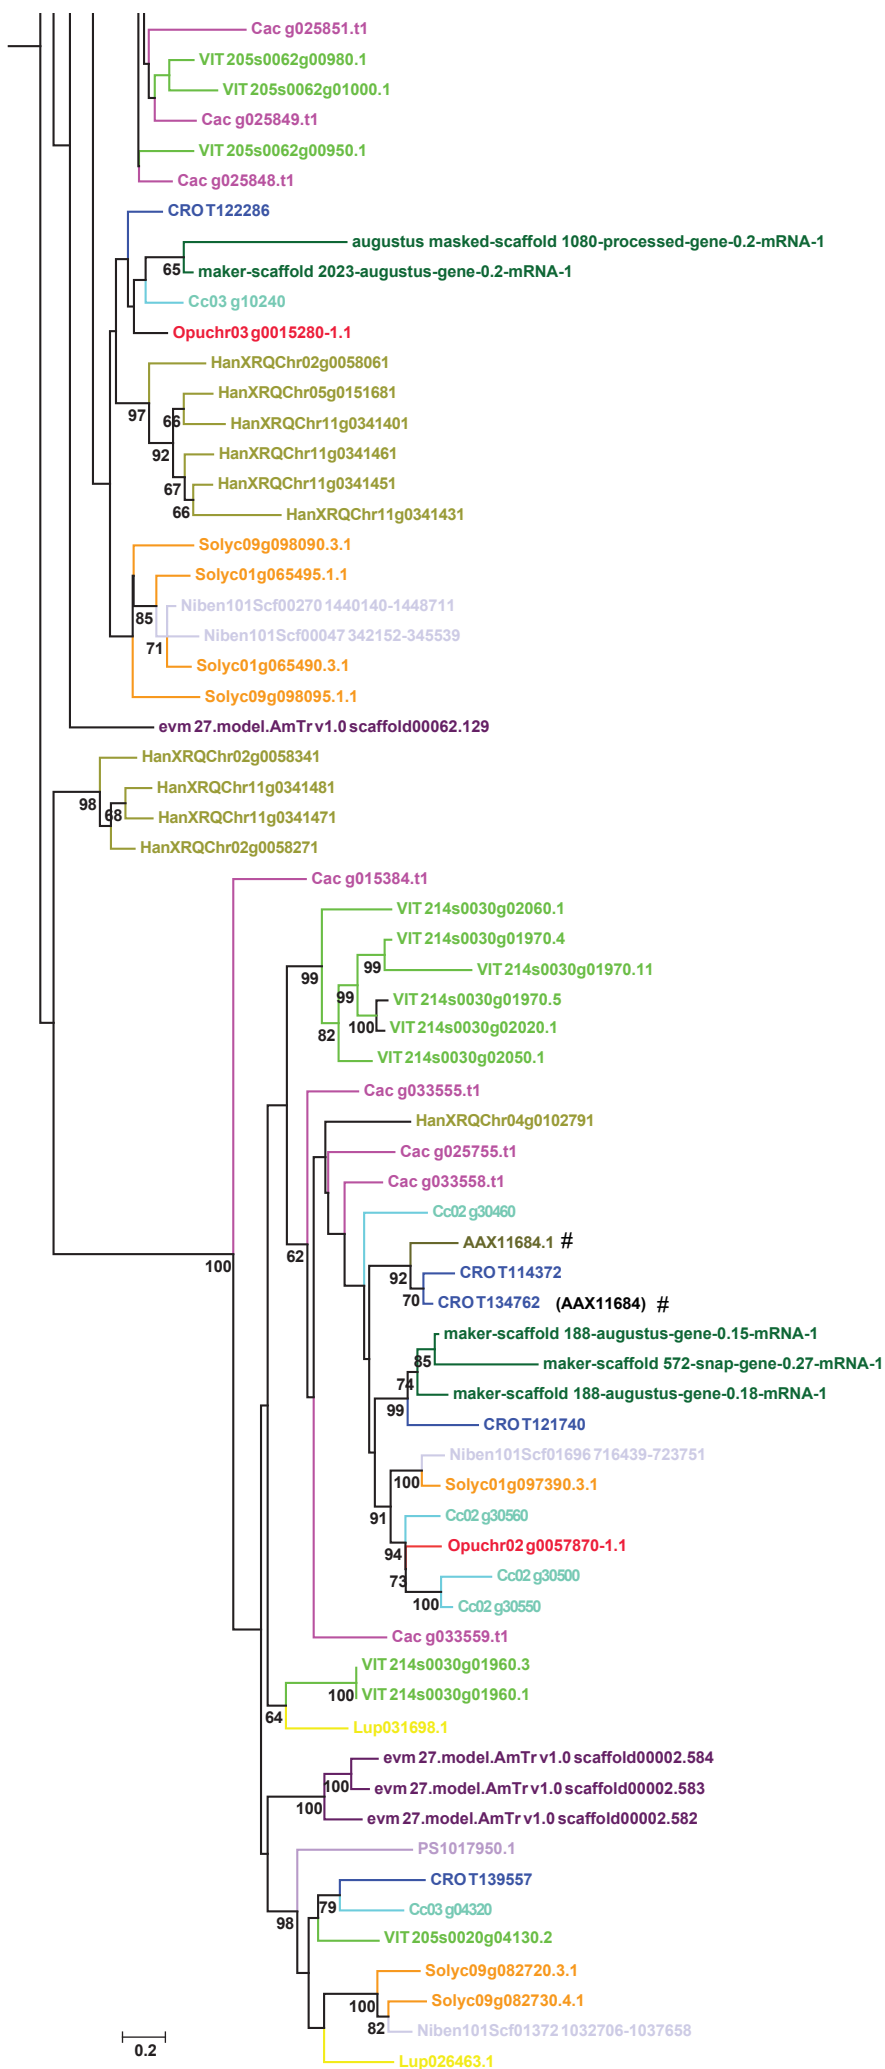

OG0000154

OG0001044

*Papaver somniferum*  
*Ambarella trichopoda*  
*Arabidopsis thaliana*  
*Lupinus angustifolius*  
*Camptotheca accuminata*  
*Helianthus annuus*  
*Coffea canephora*  
*Ophiorrhiza pumila*  
*Gelsemium sempervirens*  
*Catharanthus roseus*  
*Solanum lycopersicum*  
*Nicotiana bentimiana*  
*Vitis vinifera*

0.2

**Supplementary Fig. 40. Phylogenetic analysis of polynuridine-aldehyde esterase (PR) assigned to the orthogene families, OG000154, and OG0001044.** Gene family classification was performed based on 13 plant genomes, and the genes are colored based on the associated plant species. Functionally characterized genes are represented by "#" with the GenBank accession IDs. Strongly supported nodes with bootstrap value above 60% are shown.

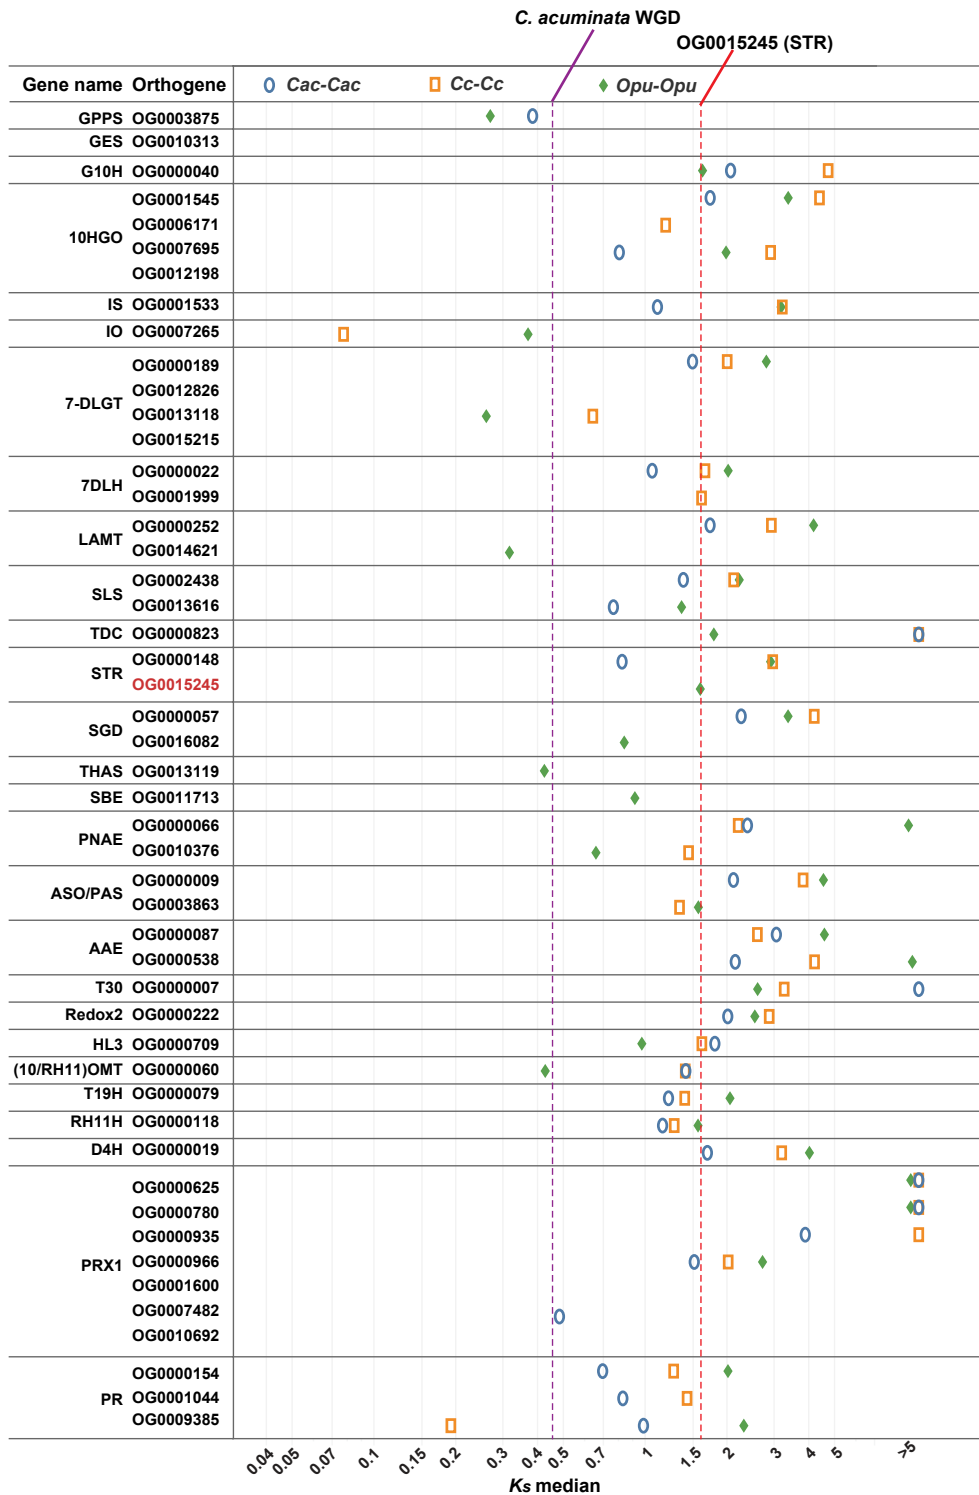

**Supplementary Fig. 41. Evolution of secoiridoid and MIA biosynthesis associated orthogene families in camptothecin producing plants and coffee genome.** Median for synonymous substitutions per synonymous sites ( $K_s$ ) were calculated using genes assigned to a given orthogene family for a plant species as described in method section. Small  $K_s$ -median values for several key enzymes associated with MIA biosynthesis in *O. pumila* and *C. acuminata*, while high  $K_s$ -median values for genes from coffee genome suggests faster and active evolution of the functional genes in the camptothecin producing plants post established STR enzymes. Results suggested evolution of STR as key event that preceded with evolution of genes associated with MIA biosynthesis, a factor that was missing for coffee genome. Source data are provided as a Source Data file.

37146490 bps

C1320 (6459424-6608465 bps)

C1318 (5501572-5845285 bps)

0 bps

| Gene id               | Orthogroup | 1  |    |   |    | 2 |   |   |   | Description                                                              |
|-----------------------|------------|----|----|---|----|---|---|---|---|--------------------------------------------------------------------------|
|                       |            | O  | C  | C | G  | O | C | C | G |                                                                          |
| Opuchr01_g0011180-1.1 | OG0013007  | 6  | 0  | 0 | 0  | * | * | * | * | strictosidine glucosidase                                                |
| Opuchr01_g0011190-1.1 | OG0013509  | 1  | 0  | 0 | 0  | * | * | * | * | • Protein kinase domain                                                  |
| Opuchr01_g0011200-1.1 | OG0013270  | 2  | 0  | 0 | 2  | * | * | * | * | putative strictosidine beta-D-glucosidase                                |
| Opuchr01_g0011210-1.1 | OG0013007  | 6  | 0  | 0 | 0  | * | * | * | * | strictosidine glucosidase                                                |
| Opuchr01_g0011270-1.1 | OG0000823  | 4  | 4  | 2 | 3  | * | * | * | * | tryptophan decarboxylase #                                               |
| Opuchr01_g0011280-1.1 | OG0013007  | 6  | 0  | 0 | 0  | * | * | * | * | strictosidine glucosidase                                                |
| Opuchr01_g0011300-1.1 | OG0003025  | 7  | 0  | 1 | 10 | * | * | * | * | putative strictosidine beta-D-glucosidase                                |
| Opuchr01_g0011310-1.1 | OG0003025  | 7  | 0  | 1 | 10 | * | * | * | * | strictosidine glucosidase                                                |
| Opuchr01_g0011320-1.1 | OG0003025  | 7  | 0  | 1 | 10 | * | * | * | * | putative strictosidine beta-D-glucosidase                                |
| Opuchr01_g0011330-1.1 | OG0013007  | 6  | 0  | 0 | 0  | * | * | * | * | strictosidine glucosidase                                                |
| Opuchr01_g0011340-1.1 | OG0015956  | 1  | 0  | 0 | 0  | * | * | * | * | UDP-glycosyltransferase 92A1-like                                        |
| Opuchr01_g0011350-1.1 |            |    |    |   |    | * | * | * | * | uncharacterized protein                                                  |
| Opuchr01_g0011360-1.1 |            |    |    |   |    | * | * | * | * | unnamed protein product                                                  |
| Opuchr01_g0011370-1.1 |            |    |    |   |    | * | * | * | * | • strictosidine glucosidase                                              |
| Opuchr01_g0011440-1.1 | OG0013007  | 6  | 0  | 0 | 0  | * | * | * | * | strictosidine glucosidase                                                |
| Opuchr01_g0011450-1.1 | OG0003025  | 7  | 0  | 1 | 10 | * | * | * | * | putative strictosidine beta-D-glucosidase                                |
| Opuchr01_g0009890-1.1 | OG0001702  | 8  | 3  | 2 | 1  | * | * | * | * | Deacetoxyvindoline 4-hydroxylase                                         |
| Opuchr01_g0009930-1.1 | OG0001702  | 8  | 3  | 2 | 1  | * | * | * | * | Deacetoxyvindoline 4-hydroxylase                                         |
| Opuchr01_g0009950-1.1 |            |    |    |   |    | * | * | * | * | Deacetoxyvindoline 4-hydroxylase                                         |
| Opuchr01_g0009970-1.1 |            |    |    |   |    | * | * | * | * | taxadien-5-alpha-ol O-acetyltransferase-like                             |
| Opuchr01_g0010030-1.1 | OG0001702  | 8  | 3  | 2 | 1  | * | * | * | * | Deacetoxyvindoline 4-hydroxylase                                         |
| Opuchr01_g0010040-1.1 |            |    |    |   |    | * | * | * | * | Phosphatidate cytidyltransferase                                         |
| Opuchr01_g0010050-1.1 | OG0010906  | 1  | 1  | 1 | 1  | * | * | * | * | vinorine synthase                                                        |
| Opuchr01_g0010060-1.1 | OG0001272  | 3  | 2  | 2 | 3  | * | * | * | * | • Deacetoxyvindoline 4-hydroxylase                                       |
| Opuchr01_g0010100-1.1 | OG0003923  | 2  | 1  | 2 | 1  | * | * | * | * | Alanine-glyoxylate aminotransferase AGT2                                 |
| Opuchr01_g0010140-1.1 | OG0000057  | 24 | 18 | 7 | 17 | * | * | * | * | strictosidine beta-D-glucosidase                                         |
| Opuchr01_g0010150-1.1 |            |    |    |   |    | * | * | * | * | uncharacterized protein LOC113729443                                     |
| Opuchr01_g0010180-1.1 |            |    |    |   |    | * | * | * | * | • APO domain                                                             |
| Opuchr01_g0010190-1.1 | OG0005658  | 1  | 1  | 1 | 2  | * | * | * | * | 7-deoxyloganetin glucosyltransferase                                     |
| Opuchr01_g0010200-1.1 | OG0000046  | 12 | 8  | 1 | 6  | * | * | * | * | putative disease resistance protein RGA3                                 |
| Opuchr01_g0010210-1.1 | OG0000057  | 24 | 18 | 7 | 17 | * | * | * | * | strictosidine glucosidase                                                |
| Opuchr01_g0010220-1.1 | OG0013500  | 2  | 0  | 1 | 0  | * | * | * | * | strictosidine glucosidase                                                |
| Opuchr01_g0010230-1.1 | OG0000057  | 24 | 18 | 7 | 17 | * | * | * | * | strictosidine beta-D-glucosidase                                         |
| Opuchr01_g0010240-1.1 | OG0001272  | 3  | 2  | 2 | 3  | * | * | * | * | Deacetoxyvindoline 4-hydroxylase                                         |
| Opuchr01_g0010250-1.1 | OG0000967  | 4  | 3  | 3 | 2  | * | * | * | * | • vesicle transport protein GOT1-like                                    |
| Opuchr01_g0010260-1.1 | OG0005244  | 1  | 1  | 1 | 1  | * | * | * | * | • SET domain                                                             |
| Opuchr01_g0010280-1.1 | OG0009219  | 1  | 1  | 1 | 1  | * | * | * | * | • Argininosuccinate synthase                                             |
| Opuchr01_g0010300-1.1 | OG0008238  | 1  | 1  | 1 | 1  | * | * | * | * | formate-tetrahydrofolate ligase                                          |
| Opuchr01_g0010310-1.1 | OG0007482  | 1  | 2  | 1 | 1  | * | * | * | * | • peroxidase 1                                                           |
| Opuchr01_g0010320-1.1 | OG0007999  | 1  | 1  | 1 | 1  | * | * | * | * | transcription factor like protein                                        |
| Opuchr01_g0010330-1.1 | OG0011040  | 1  | 1  | 1 | 1  | * | * | * | * | • probable plastid-lipid-associated protein 12, chloroplastic isoform X2 |
| Opuchr01_g0010340-1.1 | OG0013060  | 1  | 1  | 1 | 1  | * | * | * | * | uncharacterized protein LOC113760095                                     |
| Opuchr01_g0010350-1.1 | OG0008594  | 1  | 1  | 1 | 1  | * | * | * | * | • probable ribose-5-phosphate isomerase 3, chloroplastic                 |

1 Number of genes assigned to an orthogroup from a specific species

2 Presence or absence of genes from a syteny relationships with *O. pumila* { • Present \* Absent }

Supplementary Fig. 42. Monoterpene indole alkaloid (MIA) gene-clusters identified in chromosome 1 of the *Ophiorrhiza* genome assembly. The position of the gene-cluster is scaled based on chromosome size and its physical position on the chromosome. The gene description, colored as orange, represents genes with functions associated with MIA biosynthesis. O.p: *Ophiorrhiza pumila*; C.a: *Camptotheca acuminata*; C.r: *Catharanthus roseus*; G.s: *Gelsemium sempervirens*.

32811491 bps

0 bps

C1504 (8812227-9246645 bps)

C1501 (7954296-8085873 bps)

C1497 (6751199-7952760 bps)

C1493 (5697088-5998559 bps)

| Gene id               | Orthogroup | 1  |    |    |    |   | 2 |   |   |   |   | Description                                                                     |
|-----------------------|------------|----|----|----|----|---|---|---|---|---|---|---------------------------------------------------------------------------------|
|                       |            | O  | Q  | U  | S  | U | O | Q | U | S | U |                                                                                 |
| Opuchr04_g0014720-1.1 | OG0005946  | 1  | 1  | 1  | 1  | 1 | 1 | 1 | 1 | 1 | 1 | Indole-3-glycerol phosphate synthase, conserved site                            |
| Opuchr04_g0014730-1.1 |            |    |    |    |    |   |   |   |   |   |   | uncharacterized protein                                                         |
| Opuchr04_g0014760-1.1 | OG0013021  | 1  | 1  | 0  | 1  |   |   |   |   |   |   | Glyoxal oxidase, N-terminal                                                     |
| Opuchr04_g0014790-1.1 | OG0012283  | 1  | 0  | 0  | 0  |   |   |   |   |   |   | endoglucanase 11-like                                                           |
| Opuchr04_g0014800-1.1 | OG0015239  | 4  | 0  | 0  | 0  |   |   |   |   |   |   | uncharacterized protein LOC113761003 isoform X2                                 |
| Opuchr04_g0014810-1.1 |            |    |    |    |    |   |   |   |   |   |   | UDP-3-O-[3-hydroxymyristoyl] glucosamine N-acetyltransferase                    |
| Opuchr04_g0014840-1.1 | OG0005182  | 15 | 1  | 1  | 0  |   |   |   |   |   |   | Endonuclease/exonuclease/phosphatase superfamily                                |
| Opuchr04_g0014850-1.1 | OG0005775  | 12 | 0  | 0  | 0  |   |   |   |   |   |   | uncharacterized protein                                                         |
| Opuchr04_g0014880-1.1 | OG0000232  | 3  | 6  | 4  |    |   |   |   |   |   |   | E3 ubiquitin-protein ligase RGL2-like                                           |
| Opuchr04_g0014900-1.1 | OG0005213  | 1  | 1  | 1  |    |   |   |   |   |   |   | NADH dehydrogenase                                                              |
| Opuchr04_g0014920-1.1 | OG0009626  | 1  | 1  | 1  | 1  |   |   |   |   |   |   | Nucleoside phosphorylase/phosphoribosyltransferase catalytic domain superfamily |
| Opuchr04_g0014930-1.1 | OG0006840  | 1  | 2  | 1  | 1  |   |   |   |   |   |   | Aminoacyl-tRNA synthetase, class I, conserved site                              |
| Opuchr04_g0014940-1.1 | OG0000079  | 13 | 4  | 11 | 7  |   |   |   |   |   |   | tabersonine/lochnericine 19-hydroxylase                                         |
| Opuchr04_g0014950-1.1 |            |    |    |    |    |   |   |   |   |   |   | cytochrome P450 71A3-like                                                       |
| Opuchr04_g0014960-1.1 | OG0010699  | 1  | 1  | 1  | 1  |   |   |   |   |   |   | rhodanese-like domain-containing protein 11, chloroplastic                      |
| Opuchr04_g0014970-1.1 | OG0000007  | 40 | 13 | 26 | 24 |   |   |   |   |   |   | rankinidine/humantenine-11-hydroxylase 3                                        |
| Opuchr04_g0014990-1.1 | OG0000079  | 13 | 4  | 11 | 7  |   |   |   |   |   |   | tabersonine 19-hydroxylase                                                      |
| Opuchr04_g0015000-1.1 | OG0006709  | 2  | 17 | 15 | 28 |   |   |   |   |   |   | O-acetylsteimadenine oxidase                                                    |
| Opuchr04_g0015020-1.1 | OG0000027  | 72 | 6  | 15 | 7  |   |   |   |   |   |   | uncharacterized protein LOC113737449                                            |
| Opuchr04_g0015120-1.1 |            |    |    |    |    |   |   |   |   |   |   | hypothetical protein L484_006967                                                |
| Opuchr04_g0015160-1.1 | OG0000079  | 13 | 4  | 11 | 7  |   |   |   |   |   |   | tabersonine/lochnericine 19-hydroxylase                                         |
| Opuchr04_g0015170-1.1 | OG0000079  | 13 | 4  | 11 | 7  |   |   |   |   |   |   | tabersonine/lochnericine 19-hydroxylase                                         |
| Opuchr04_g0015190-1.1 | OG0009082  | 2  | 1  | 1  | 1  |   |   |   |   |   |   | multiprotein-bridging factor 1a                                                 |
| Opuchr04_g0015220-1.1 | OG0000079  | 13 | 4  | 11 | 7  |   |   |   |   |   |   | Tabersonine 19-hydroxylase                                                      |
| Opuchr04_g0015230-1.1 | OG0000079  | 13 | 4  | 11 | 7  |   |   |   |   |   |   | Tabersonine 19-hydroxylase                                                      |
| Opuchr04_g0015240-1.1 |            |    |    |    |    |   |   |   |   |   |   | Ulp1 protease family, C-terminal catalytic domain                               |
| Opuchr04_g0015290-1.1 | OG0000079  | 13 | 4  | 11 | 7  |   |   |   |   |   |   | tabersonine/lochnericine 19-hydroxylase                                         |
| Opuchr04_g0015290-1.1 | OG0000079  | 13 | 4  | 11 | 7  |   |   |   |   |   |   | tabersonine/lochnericine 19-hydroxylase                                         |
| Opuchr04_g0015320-1.1 | OG0001242  | 3  | 3  | 1  | 3  |   |   |   |   |   |   | Protein kinase domain                                                           |
| Opuchr04_g0015330-1.1 | OG0006608  | 2  | 2  | 2  | 1  |   |   |   |   |   |   | protein LYK5-like                                                               |
| Opuchr04_g0015350-1.1 | OG0010268  | 1  | 2  | 1  | 1  |   |   |   |   |   |   | quinolinate synthase chloroplastic                                              |
| Opuchr04_g0015360-1.1 | OG0002105  | 2  | 2  | 5  | 2  |   |   |   |   |   |   | high-affinity nitrate transporter 3.1-like                                      |
| Opuchr04_g0015370-1.1 | OG0002105  | 2  | 2  | 5  | 2  |   |   |   |   |   |   | high-affinity nitrate transporter 3.1-like                                      |
| Opuchr04_g0015380-1.1 |            |    |    |    |    |   |   |   |   |   |   | uncharacterized protein LOC113755505                                            |
| Opuchr04_g0015390-1.1 | OG0012335  | 1  | 1  | 1  | 1  |   |   |   |   |   |   | DHH phosphoesterase superfamily                                                 |
| Opuchr04_g0013420-1.1 | OG0000082  | 13 | 12 | 15 | 20 |   |   |   |   |   |   | stemmadenine O-acetyltransferase                                                |
| Opuchr04_g0013430-1.1 | OG0000082  | 13 | 12 | 15 | 20 |   |   |   |   |   |   | stemmadenine O-acetyltransferase                                                |
| Opuchr04_g0013440-1.1 | OG0000082  | 13 | 12 | 15 | 20 |   |   |   |   |   |   | stemmadenine O-acetyltransferase                                                |
| Opuchr04_g0013450-1.1 | OG0003283  | 8  | 0  | 5  | 0  |   |   |   |   |   |   | Zinc finger, BED-type                                                           |
| Opuchr04_g0013480-1.1 | OG0000342  | 4  | 4  | 3  | 3  |   |   |   |   |   |   | Vinorine synthase                                                               |
| Opuchr04_g0013530-1.1 |            |    |    |    |    |   |   |   |   |   |   | Cytochrome P450, E-class, group I                                               |
| Opuchr04_g0013540-1.1 |            |    |    |    |    |   |   |   |   |   |   | putative F-box/LRR-repeat protein At3g28410                                     |
| Opuchr04_g0013560-1.1 | OG0000291  | 7  | 2  | 13 | 6  |   |   |   |   |   |   | tabersonine 19-hydroxy-O-acetyltransferase                                      |
| Opuchr04_g0013580-1.1 | OG0000099  | 21 | 0  | 14 | 4  |   |   |   |   |   |   | NAD(P)H-quinone oxidoreductase subunit 2 A, chloroplastic                       |
| Opuchr04_g0013590-1.1 |            |    |    |    |    |   |   |   |   |   |   | PREDICTED: NAD(P)H-quinone oxidoreductase subunit 2 B, chloroplastic, partial   |
| Opuchr04_g0013620-1.1 | OG0000082  | 13 | 12 | 15 | 20 |   |   |   |   |   |   | stemmadenine O-acetyltransferase                                                |
| Opuchr04_g0013630-1.1 | OG0001432  | 13 | 2  | 2  | 1  |   |   |   |   |   |   | hypothetical protein CUMW_134320                                                |
| Opuchr04_g0013640-1.1 | OG0000082  | 13 | 12 | 15 | 20 |   |   |   |   |   |   | stemmadenine O-acetyltransferase                                                |
| Opuchr04_g0013670-1.1 | OG0009879  | 1  | 1  | 1  | 1  |   |   |   |   |   |   | uncharacterized protein LOC113738824                                            |
| Opuchr04_g0013680-1.1 | OG0006463  | 1  | 2  | 1  | 1  |   |   |   |   |   |   | nucleoside diphosphate kinase 2, chloroplastic                                  |
| Opuchr04_g0013690-1.1 | OG0006463  | 2  | 2  | 2  | 2  |   |   |   |   |   |   | DELA protein RGL1-like                                                          |
| Opuchr04_g0013700-1.1 | OG0005981  | 1  | 1  | 1  | 1  |   |   |   |   |   |   | Protein kinase domain                                                           |
| Opuchr04_g0011750-1.1 | OG0007265  | 2  | 1  | 2  | 3  |   |   |   |   |   |   | 7-deoxyloganic acid synthase                                                    |
| Opuchr04_g0011760-1.1 | OG0010940  | 1  | 0  | 1  | 0  |   |   |   |   |   |   | unnamed protein product                                                         |
| Opuchr04_g0011770-1.1 | OG0000905  | 2  | 3  | 2  | 3  |   |   |   |   |   |   | NAC domain                                                                      |
| Opuchr04_g0011800-1.1 | OG0002886  | 1  | 3  | 2  | 1  |   |   |   |   |   |   | Homeobox domain                                                                 |
| Opuchr04_g0011820-1.1 | OG0003862  | 17 | 0  | 2  | 0  |   |   |   |   |   |   | putative F-box/LRR-repeat protein At3g28410                                     |
| Opuchr04_g0011830-1.1 |            |    |    |    |    |   |   |   |   |   |   | uncharacterized protein                                                         |
| Opuchr04_g0011840-1.1 | OG0007971  | 1  | 1  | 1  | 2  |   |   |   |   |   |   | probable tRNA N6-adenosine threonylcarbamoyltransferase                         |
| Opuchr04_g0011860-1.1 | OG0003774  | 1  | 2  | 1  | 4  |   |   |   |   |   |   | probable cyclic nucleotide-gated ion channel 20, chloroplastic                  |
| Opuchr04_g0011880-1.1 | OG0003418  | 2  | 2  | 1  | 1  |   |   |   |   |   |   | elongation factor 1-alpha-like                                                  |
| Opuchr04_g0011890-1.1 | OG0001236  | 3  | 3  | 3  | 2  |   |   |   |   |   |   | Mitochondrial import inner membrane translocase subunit TIM14-3, partial        |
| Opuchr04_g0011900-1.1 | OG0007172  | 1  | 2  | 2  | 1  |   |   |   |   |   |   | putative D-cysteine desulfhydrase 1, mitochondrial                              |
| Opuchr04_g0011910-1.1 | OG0000674  | 3  | 5  | 3  | 3  |   |   |   |   |   |   | glutamate decarboxylase-like                                                    |
| Opuchr04_g0011920-1.1 | OG0007489  | 1  | 1  | 1  | 2  |   |   |   |   |   |   | DNA polymerase alpha/epsilon, subunit B                                         |
| Opuchr04_g0011970-1.1 | OG0011305  | 1  | 1  | 1  | 1  |   |   |   |   |   |   | protein NRDE2 homolog                                                           |
| Opuchr04_g0011980-1.1 | OG0001326  | 1  | 3  | 2  | 2  |   |   |   |   |   |   | protein LURP-one-related 8-like                                                 |
| Opuchr04_g0011990-1.1 | OG0003159  | 1  | 2  | 1  | 1  |   |   |   |   |   |   | uncharacterized protein LOC113741941                                            |
| Opuchr04_g0012000-1.1 | OG0011237  | 1  | 1  | 1  | 1  |   |   |   |   |   |   | probable arabinose 5-phosphate isomerase                                        |
| Opuchr04_g0012010-1.1 | OG0009158  | 1  | 1  | 1  | 0  |   |   |   |   |   |   | thylakoid lumenal 17.9 kDa protein, chloroplastic-like                          |
| Opuchr04_g0012020-1.1 | OG0006104  | 2  | 1  | 1  | 1  |   |   |   |   |   |   | uncharacterized protein LOC113742114 isoform X5                                 |
| Opuchr04_g0012030-1.1 |            |    |    |    |    |   |   |   |   |   |   | uncharacterized protein LOC112177048 isoform X2                                 |
| Opuchr04_g0012040-1.1 |            |    |    |    |    |   |   |   |   |   |   | Redox 2 #                                                                       |
| Opuchr04_g0012050-1.1 | OG0000022  | 5  | 9  | 4  | 5  |   |   |   |   |   |   | redox 2                                                                         |
| Opuchr04_g0012060-1.1 | OG0000693  | 9  | 9  | 2  | 1  |   |   |   |   |   |   | peroxidase 1                                                                    |
| Opuchr04_g0012080-1.1 | OG0000222  | 5  | 6  | 4  | 5  |   |   |   |   |   |   | redox 2                                                                         |
| Opuchr04_g0013410-1.1 |            |    |    |    |    |   |   |   |   |   |   | vinorine synthase-like                                                          |
| Opuchr04_g0010120-1.1 | OG0003212  | 1  | 1  | 4  | 2  |   |   |   |   |   |   | strictosidine beta-D-glucosidase                                                |
| Opuchr04_g0010130-1.1 | OG0001686  | 1  | 4  | 1  | 1  |   |   |   |   |   |   | uncharacterized protein LOC113740142                                            |
| Opuchr04_g0010140-1.1 | OG0009434  | 1  | 1  | 1  | 1  |   |   |   |   |   |   | oleosin 1-like                                                                  |
| Opuchr04_g0010150-1.1 | OG0014255  | 1  | 1  | 1  | 1  |   |   |   |   |   |   | protein CHUP1, chloroplastic-like                                               |
| Opuchr04_g0010160-1.1 | OG0002233  | 2  | 3  | 2  | 3  |   |   |   |   |   |   | translation initiation factor eIF-2B subunit delta-like isoform X3              |
| Opuchr04_g0010180-1.1 | OG0006148  | 1  | 1  | 1  | 1  |   |   |   |   |   |   | UskA (IPR008016) Rossmann-like alpha/beta/alpha sandwich fold                   |
| Opuchr04_g0010190-1.1 | OG0012821  | 1  | 1  | 1  | 1  |   |   |   |   |   |   | protein decapping 5-like                                                        |
| Opuchr04_g0010210-1.1 | OG0011233  | 1  | 1  | 1  | 1  |   |   |   |   |   |   | single-stranded DNA-binding protein, mitochondrial                              |
| Opuchr04_g0010220-1.1 | OG0008273  | 1  | 1  | 1  | 1  |   |   |   |   |   |   | Zinc finger, C3HC-like                                                          |
| Opuchr04_g0010240-1.1 | OG0002690  | 2  | 2  | 2  | 2  |   |   |   |   |   |   | piriformospora indica-insensitive protein 2-like isoform X1                     |
| Opuchr04_g0010250-1.1 | OG0008363  | 1  | 1  | 1  | 1  |   |   |   |   |   |   | cytochrome c-type biogenesis CcmH-like mitochondrial protein                    |
| Opuchr04_g0010260-1.1 | OG0002334  | 3  | 2  | 2  | 1  |   |   |   |   |   |   | mavicyanin-like                                                                 |
| Opuchr04_g0010270-1.1 | OG0005002  | 1  | 1  | 2  | 1  |   |   |   |   |   |   | DEAD-box ATP-dependent RNA helicase 510                                         |
| Opuchr04_g0010280-1.1 | OG0007032  | 1  | 2  | 1  | 1  |   |   |   |   |   |   | kinesin-like protein KIN-3A isoform X1                                          |
| Opuchr04_g0010290-1.1 | OG0005061  | 1  | 1  | 1  | 1  |   |   |   |   |   |   | protein MIZU-KUSSEI 1-like                                                      |
| Opuchr04_g0010310-1.1 | OG0006540  | 1  | 2  | 1  | 2  |   |   |   |   |   |   | G patch domain-containing protein TGH-like                                      |
| Opuchr04_g0010330-1.1 | OG0000692  | 3  | 6  | 3  | 3  |   |   |   |   |   |   | putative phospholipid-transporting ATPase 9 isoform X10                         |
| Opuchr04_g0010350-1.1 | OG0011983  | 1  | 1  | 1  | 1  |   |   |   |   |   |   | uncharacterized protein LOC113741806 isoform X2                                 |
| Opuchr04_g0010360-1.1 | OG0011638  | 1  | 1  | 1  | 1  |   |   |   |   |   |   | ethylene-responsive transcription factor WIN1-like                              |
| Opuchr04_g0010370-1.1 |            |    |    |    |    |   |   |   |   |   |   | F-box/kelch-repeat protein At3g23880-like                                       |
| Opuchr04_g0010390-1.1 | OG0010273  | 1  | 1  | 1  | 1  |   |   |   |   |   |   | calcium sensing receptor, chloroplastic isoform X1                              |
| Opuchr04_g0010400-1.1 | OG0005691  | 1  | 2  | 1  | 1  |   |   |   |   |   |   | AMP-binding domain-containing protein                                           |
| Opuchr04_g0010410-1.1 | OG0007057  | 1  | 2  | 1  | 1  |   |   |   |   |   |   | unnamed protein product                                                         |
| Opuchr04_g0010420-1.1 | OG001509   | 5  | 2  | 2  | 2  |   |   |   |   |   |   | protein trichome birefringence-like 43                                          |
| Opuchr04_g0010430-1.1 |            |    |    |    |    |   |   |   |   |   |   |                                                                                 |

**Supplementary Fig. 43. Monoterpene indole alkaloid (MIA) gene-clusters identified in chromosome 4 of the *Ophiorrhiza* genome assembly.** The position of the gene-cluster is scaled based on chromosome size and its physical position on the chromosome. The gene description, colored as orange, represents genes with functions associated with MIA biosynthesis. O.p: *Ophiorrhiza pumila*; C.a: *Camptotheca acuminata*; C.r: *Catharanthus roseus*; G.s: *Gelsemium sempervirens*.



| Gene id               | Orthogroup | ①  |    | ②  |    | Description                                                               |
|-----------------------|------------|----|----|----|----|---------------------------------------------------------------------------|
|                       |            | O  | C  | O  | C  |                                                                           |
| Opuchr05_g0058170-1.1 | OG0012090  | 1  | 0  | 0  | 0  | putative callose synthase 8 isoform X1                                    |
| Opuchr05_g0058180-1.1 | OG0011264  | 1  | 1  | 1  | 1  | Tetratricopeptide-like helical domain superfamily                         |
| Opuchr05_g0058190-1.1 | OG0003740  | 1  | 2  | 1  | 1  | C2 domain-containing protein At1g53590-like                               |
| Opuchr05_g0058200-1.1 | OG0006180  | 1  | 1  | 1  | 1  | persulfide dioxygenase ETHE1 homolog, mitochondrial                       |
| Opuchr05_g0058210-1.1 | OG0002937  | 2  | 2  | 1  | 1  | 60S ribosomal protein L18a-like protein                                   |
| Opuchr05_g0058250-1.1 | OG0000022  | 25 | 13 | 10 | 15 | 7-deoxyloganic acid 7-hydroxylase #                                       |
| Opuchr05_g0058270-1.1 | OG0000180  | 78 | 0  | 0  | 0  | hypothetical protein VIGAN_05281600, partial                              |
| Opuchr05_g0058300-1.1 | OG0000022  | 25 | 13 | 10 | 15 | 7-deoxyloganic acid 7-hydroxylase #                                       |
| Opuchr05_g0058340-1.1 | OG0000022  | 25 | 13 | 10 | 15 | secologanin synthase                                                      |
| Opuchr05_g0058390-1.1 | OG0000022  | 25 | 13 | 10 | 15 | secologanin synthase                                                      |
| Opuchr05_g0058390-1.1 | OG0002307  | 2  | 2  | 1  | 1  | mitochondrial inner membrane protease subunit 1                           |
| Opuchr05_g0058410-1.1 | OG0006200  | 1  | 2  | 1  | 1  | probable solanensyl-diphosphate synthase 3, chloroplastic                 |
| Opuchr05_g0058420-1.1 | OG0000636  | 1  | 2  | 2  | 3  | PREDICTED: major pollen allergen Ole e 10-like                            |
| Opuchr05_g0058430-1.1 | OG0007175  | 1  | 2  | 1  | 1  | fatty-acid-binding protein 3, chloroplastic                               |
| Opuchr05_g0053440-1.1 | OG0000022  | 25 | 13 | 10 | 15 | secologanin synthase                                                      |
| Opuchr05_g0053510-1.1 | OG0000022  | 25 | 13 | 10 | 15 | 7-deoxyloganic acid 7-hydroxylase                                         |
| Opuchr05_g0053540-1.1 | OG0000022  | 25 | 13 | 10 | 15 | secologanin synthase                                                      |
| Opuchr05_g0053550-1.1 | OG0014197  | 5  | 0  | 0  | 0  | AAA-ATPase                                                                |
| Opuchr05_g0053590-1.1 | OG0000022  | 25 | 13 | 10 | 15 | secologanin synthase                                                      |
| Opuchr05_g0053600-1.1 | OG0000022  | 25 | 13 | 10 | 15 | secologanin synthase                                                      |
| Opuchr05_g0053610-1.1 | OG0014261  | 1  | 0  | 0  | 1  | unnamed protein product                                                   |
| Opuchr05_g0053620-1.1 | OG0000022  | 25 | 13 | 10 | 15 | secologanin synthase                                                      |
| Opuchr05_g0053630-1.1 | OG0000022  | 25 | 13 | 10 | 15 | secologanin synthase                                                      |
| Opuchr05_g0053640-1.1 | OG001291   | 3  | 1  | 1  | 1  | unnamed protein product                                                   |
| Opuchr05_g0053690-1.1 | OG0000022  | 25 | 13 | 10 | 15 | secologanin synthase                                                      |
| Opuchr05_g0053720-1.1 | OG0000022  | 25 | 13 | 10 | 15 | secologanin synthase                                                      |
| Opuchr05_g0053740-1.1 | OG0000022  | 25 | 13 | 10 | 15 | secologanin synthase                                                      |
| Opuchr05_g0053750-1.1 | OG0000022  | 25 | 13 | 10 | 15 | secologanin synthase                                                      |
| Opuchr05_g0053810-1.1 | OG0000022  | 25 | 13 | 10 | 15 | secologanin synthase                                                      |
| Opuchr05_g0053850-1.1 | OG0000022  | 25 | 13 | 10 | 15 | secologanin synthase                                                      |
| Opuchr05_g0053880-1.1 | OG0000022  | 25 | 13 | 10 | 15 | secologanin synthase                                                      |
| Opuchr05_g0053910-1.1 | OG0000022  | 25 | 13 | 10 | 15 | secologanin synthase                                                      |
| Opuchr05_g0053920-1.1 | OG0002045  | 10 | 4  | 1  | 2  | Component of the U4/U6, U5 snRNP/mitosis protein DIM1                     |
| Opuchr05_g0053930-1.1 | OG0000022  | 25 | 13 | 10 | 15 | secologanin synthase                                                      |
| Opuchr05_g0053940-1.1 | OG0000022  | 25 | 13 | 10 | 15 | secologanin synthase                                                      |
| Opuchr05_g0053950-1.1 | OG0014838  | 1  | 0  | 0  | 0  | glutamate receptor 3.6-like isoform X1                                    |
| Opuchr05_g0053990-1.1 | OG0001291  | 3  | 1  | 1  | 1  | unnamed protein product                                                   |
| Opuchr05_g0054000-1.1 | OG0014246  | 2  | 1  | 2  | 0  | unnamed protein product                                                   |
| Opuchr05_g0054020-1.1 | OG0000022  | 25 | 13 | 10 | 15 | secologanin synthase                                                      |
| Opuchr05_g0054040-1.1 | OG0000022  | 25 | 13 | 10 | 15 | secologanin synthase                                                      |
| Opuchr05_g0054050-1.1 | OG0013935  | 1  | 0  | 2  | 3  | Nuclear/nucleolar GTPase 2                                                |
| Opuchr05_g0054070-1.1 | OG0010077  | 1  | 1  | 1  | 1  | secologanin synthase                                                      |
| Opuchr05_g0054080-1.1 | OG0000022  | 25 | 13 | 10 | 15 | secologanin synthase                                                      |
| Opuchr05_g0054090-1.1 | OG0002398  | 4  | 0  | 2  | 2  | homeobox-leucine zipper protein ANTHOCYANINLESS 2-like isoform X4         |
| Opuchr05_g0054100-1.1 | OG0000022  | 25 | 13 | 10 | 15 | secologanin synthase                                                      |
| Opuchr05_g0054130-1.1 | OG0000022  | 25 | 13 | 10 | 15 | 7-deoxyloganic acid 7-hydroxylase                                         |
| Opuchr05_g0054140-1.1 | OG0000022  | 25 | 13 | 10 | 15 | 7-deoxyloganic acid 7-hydroxylase                                         |
| Opuchr05_g0054200-1.1 | OG0017253  | 1  | 0  | 0  | 1  | cytochrome P450 CYP72A219-like                                            |
| Opuchr05_g0054210-1.1 | OG0000022  | 25 | 13 | 10 | 15 | secologanin synthase                                                      |
| Opuchr05_g0054220-1.1 | OG0000022  | 25 | 13 | 10 | 15 | secologanin synthase                                                      |
| Opuchr05_g0008060-1.1 | OG0000421  | 5  | 7  | 7  | 6  | Multi antimicrobial extrusion protein                                     |
| Opuchr05_g0008080-1.1 | OG0000421  | 5  | 7  | 7  | 6  | Multi antimicrobial extrusion protein                                     |
| Opuchr05_g0008090-1.1 | OG0004051  | 2  | 2  | 1  | 1  | peroxidase 1                                                              |
| Opuchr05_g0008110-1.1 | OG0000022  | 25 | 13 | 10 | 15 | secologanin synthase                                                      |
| Opuchr05_g0008130-1.1 | OG0000191  | 47 | 0  | 0  | 33 | mitochondrial import inner membrane translocase subunit TIM23-2-like      |
| Opuchr05_g0008140-1.1 | OG0000022  | 25 | 13 | 10 | 15 | secologanin synthase                                                      |
| Opuchr05_g0008160-1.1 | OG0000022  | 25 | 13 | 10 | 15 | secologanin synthase                                                      |
| Opuchr05_g0008180-1.1 | OG0015245  | 2  | 0  | 1  | 1  | unnamed protein product                                                   |
| Opuchr05_g0008210-1.1 | OG0000022  | 25 | 13 | 10 | 15 | secologanin synthase                                                      |
| Opuchr05_g0008240-1.1 | OG0000536  | 3  | 3  | 2  | 2  | Amino acid transporter, transmembrane domain                              |
| Opuchr05_g0008250-1.1 | OG0000022  | 25 | 13 | 10 | 15 | secologanin synthase                                                      |
| Opuchr05_g0008260-1.1 | OG0000022  | 25 | 13 | 10 | 15 | secologanin synthase                                                      |
| Opuchr05_g0008270-1.1 | OG0000022  | 25 | 13 | 10 | 15 | secologanin synthase                                                      |
| Opuchr05_g0008280-1.1 | OG0000022  | 25 | 13 | 10 | 15 | secologanin synthase                                                      |
| Opuchr05_g0008290-1.1 | OG0000180  | 78 | 0  | 0  | 0  | cytochrome P450 71A3-like                                                 |
| Opuchr05_g0008300-1.1 | OG0015245  | 2  | 0  | 1  | 1  | unnamed protein product                                                   |
| Opuchr05_g0008350-1.1 | OG0000022  | 25 | 13 | 10 | 15 | secologanin synthase                                                      |
| Opuchr05_g0008360-1.1 | OG0000022  | 25 | 13 | 10 | 15 | secologanin synthase                                                      |
| Opuchr05_g0008370-1.1 | OG0000823  | 4  | 4  | 2  | 3  | tryptophan decarboxylase                                                  |
| Opuchr05_g0008390-1.1 | OG0000421  | 5  | 7  | 7  | 6  | Multi antimicrobial extrusion-like protein                                |
| Opuchr05_g0008410-1.1 | OG0000421  | 5  | 7  | 7  | 6  | Multi antimicrobial extrusion protein                                     |
| Opuchr05_g0006090-1.1 | OG0000067  | 4  | 13 | 3  | 2  | vinorine hydroxylase                                                      |
| Opuchr05_g0006100-1.1 | OG0006048  | 1  | 2  | 1  | 1  | xyloglucan endotransglycosylase/hydrolase 2                               |
| Opuchr05_g0006110-1.1 | OG0010313  | 1  | 2  | 1  | 1  | geraniol synthase #                                                       |
| Opuchr05_g0006120-1.1 | OG0000047  | 13 | 11 | 4  | 7  | geraniol synthase                                                         |
| Opuchr05_g0005520-1.1 | OG0000823  | 4  | 4  | 2  | 3  | tryptophan decarboxylase 2                                                |
| Opuchr05_g0005530-1.1 | OG0008024  | 1  | 1  | 1  | 1  | Rieske iron-sulphur protein, C-terminal                                   |
| Opuchr05_g0005540-1.1 | OG0002466  | 1  | 3  | 1  | 2  | putative cyclin-D6-1                                                      |
| Opuchr05_g0005550-1.1 | OG0001045  | 2  | 4  | 2  | 2  | SANT/Myb domain                                                           |
| Opuchr05_g0005560-1.1 | OG0004222  | 3  | 0  | 1  | 3  | UDP-glucose indole glucosyltransferase                                    |
| Opuchr05_g0005580-1.1 | OG0000022  | 25 | 13 | 10 | 15 | secologanin synthase                                                      |
| Opuchr05_g0005590-1.1 | OG0004222  | 3  | 0  | 1  | 3  | 7-deoxyloganic acid glucosyltransferase                                   |
| Opuchr05_g0002460-1.1 | OG0000060  | 6  | 8  | 17 | 6  | O-methyltransferase                                                       |
| Opuchr05_g0002470-1.1 | OG0000060  | 6  | 8  | 17 | 6  | Tabersonine 16-O-methyltransferase                                        |
| Opuchr05_g0002480-1.1 | OG0000060  | 6  | 8  | 17 | 6  | cytochrome P450 81D11-like                                                |
| Opuchr05_g0002490-1.1 | OG0000060  | 6  | 8  | 17 | 6  | unnamed protein product                                                   |
| Opuchr05_g0002500-1.1 | OG0000060  | 6  | 8  | 17 | 6  | vinorine hydroxylase                                                      |
| Opuchr05_g0002510-1.1 | OG0000060  | 6  | 8  | 17 | 6  | rankinidine/humantenine-11-O-methyltransferase                            |
| Opuchr05_g0002600-1.1 | OG0013566  | 1  | 2  | 0  | 2  | cytochrome P450 family 71 subfamily CR polypeptide 1                      |
| Opuchr05_g0002650-1.1 | OG0004229  | 21 | 0  | 0  | 0  | unnamed protein product                                                   |
| Opuchr05_g0002670-1.1 | OG0004583  | 2  | 4  | 1  | 0  | vinorine hydroxylase                                                      |
| Opuchr05_g0002680-1.1 | OG0008242  | 1  | 1  | 1  | 1  | Acyl-CoA oxidase, C-terminal                                              |
| Opuchr05_g0002690-1.1 | OG0000022  | 25 | 13 | 10 | 15 | secologanin synthase                                                      |
| Opuchr05_g0002700-1.1 | OG0001252  | 2  | 2  | 2  | 2  | unnamed protein product                                                   |
| Opuchr05_g0002710-1.1 | OG0000060  | 6  | 8  | 17 | 6  | OPA3-like protein                                                         |
| Opuchr05_g0002720-1.1 | OG0000060  | 6  | 8  | 17 | 6  | 10-hydroxycamptothecin O-methyltransferase                                |
| Opuchr05_g0000510-1.1 | OG0000060  | 6  | 8  | 17 | 6  | Tabersonine 16-O-methyltransferase                                        |
| Opuchr05_g0000520-1.1 | OG0002845  | 2  | 1  | 1  | 2  | ATP sulfurylase 2                                                         |
| Opuchr05_g0000540-1.1 | OG0002212  | 1  | 1  | 0  | 2  | late embryogenesis abundant protein EMB564-like                           |
| Opuchr05_g0000550-1.1 | OG0012112  | 1  | 2  | 1  | 1  | cysteine-rich and transmembrane domain-containing protein B-like          |
| Opuchr05_g0000560-1.1 | OG0002350  | 2  | 3  | 2  | 2  | 7-deoxyloganic acid glucosyltransferase                                   |
| Opuchr05_g0000570-1.1 | OG0001246  | 2  | 3  | 2  | 2  | OTU domain-containing protein DDB_G0284757                                |
| Opuchr05_g0000610-1.1 | OG0002880  | 2  | 1  | 2  | 1  | protein PAT1 homolog 1                                                    |
| Opuchr05_g0000620-1.1 | OG0006944  | 1  | 2  | 1  | 1  | UDP-arabinose 4-epimerase 1-like                                          |
| Opuchr05_g0000630-1.1 | OG0000114  | 7  | 6  | 6  | 3  | heat shock 70 kDa protein 17                                              |
| Opuchr05_g0000640-1.1 | OG0008182  | 2  | 1  | 1  | 1  | glutamate receptor 2.8-like                                               |
| Opuchr05_g0000650-1.1 | OG0012412  | 1  | 1  | 1  | 0  | perate reductase                                                          |
| Opuchr05_g0000670-1.1 | OG0006802  | 1  | 1  | 1  | 1  | transcription factor PHYTOCHROME INTERACTING FACTOR-LIKE 13-like          |
| Opuchr05_g0000680-1.1 | OG0011218  | 1  | 1  | 1  | 1  | FAD/NAD(P)-binding domain superfamily (IPR036188)                         |
| Opuchr05_g0000690-1.1 | OG0001742  | 6  | 1  | 1  | 7  | pentatricopeptide repeat-containing protein At3g59040-like                |
| Opuchr05_g0000700-1.1 | OG0001742  | 6  | 1  | 1  | 7  | geissoschizine oxidase                                                    |
| Opuchr05_g0000710-1.1 | OG0012560  | 1  | 2  | 0  | 0  | Cytochrome P450 87A3 like                                                 |
| Opuchr05_g0000730-1.1 | OG0003167  | 1  | 3  | 2  | 2  | Multi antimicrobial extrusion protein                                     |
| Opuchr05_g0000740-1.1 | OG0012431  | 1  | 1  | 1  | 1  | auxin response factor 6-like                                              |
| Opuchr05_g0000750-1.1 | OG0002940  | 2  | 2  | 2  | 2  | pentatricopeptide repeat-containing protein At2g35030, mitochondrial-like |
| Opuchr05_g0000780-1.1 | OG0004974  | 1  | 2  | 1  | 1  | N-acetylglucosamine kinase-like                                           |
| Opuchr05_g0000790-1.1 | OG0000291  | 7  | 2  | 13 | 6  | DEAD-box ATP-dependent RNA helicase 53, mitochondrial-like                |
| Opuchr05_g0000810-1.1 | OG0000424  | 4  | 4  | 2  | 3  | tabersonine-19-hydroxy-O-acetyltransferase                                |
| Opuchr05_g0000820-1.1 | OG0005626  | 1  | 1  | 1  | 2  | Zinc finger, RING/FYVE/PHD-type                                           |
| Opuchr05_g0000830-1.1 | OG0007923  | 1  | 1  | 2  | 1  | endoplasmic reticulum-Golgi intermediate compartment protein 3            |
| Opuchr05_g0000850-1.1 | OG0016714  | 1  | 0  | 0  | 0  | membrane-associated progesterone-binding protein 4-like isoform X1        |
| Opuchr05_g0000860-1.1 | OG0010773  | 1  | 1  | 0  | 1  | Squalene/phytoene synthase                                                |
| Opuchr05_g0000870-1.1 | OG0011835  | 1  | 1  | 1  | 1  | RNA polymerase N178 kDa subunit                                           |
| Opuchr05_g0000880-1.1 | OG0005151  | 2  | 2  | 2  | 2  | glucuronoxylan 4-O-methyltransferase 3-like                               |
|                       |            |    |    |    |    | Pyridoxal phosphate-dependent transferase, major domain                   |

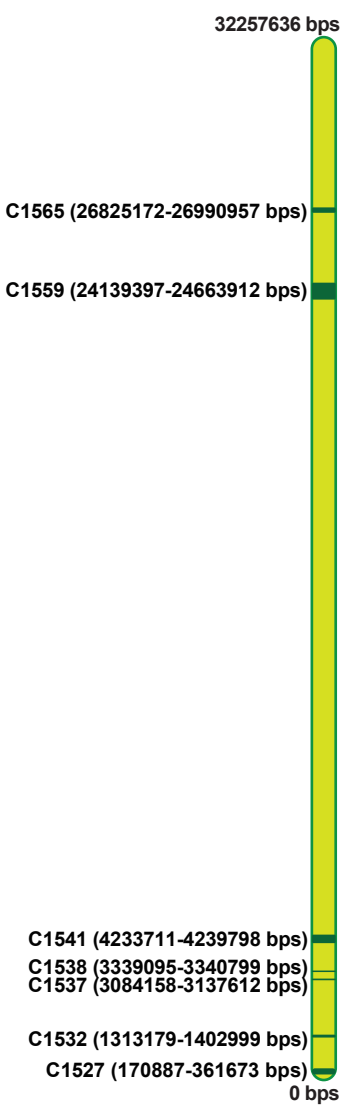

① Number of genes assigned to an orthogroup from a specific species  
 ② Presence or absence of genes from a syteny relationships with *O. pumila* { • Present × Absent }

**Supplementary Fig. 44. Monoterpene indole alkaloid (MIA) gene-clusters identified in chromosome 5 of the *Ophiorrhiza* genome assembly.** The position of the gene-cluster is scaled based on chromosome size and its physical position on the chromosome. The gene description, colored as orange, represents genes with functions associated with MIA biosynthesis. O.p: *Ophiorrhiza pumila*; C.a: *Camptotheca acuminata*; C.r: *Catharanthus roseus*; G.s: *Gelsemium sempervirens*.

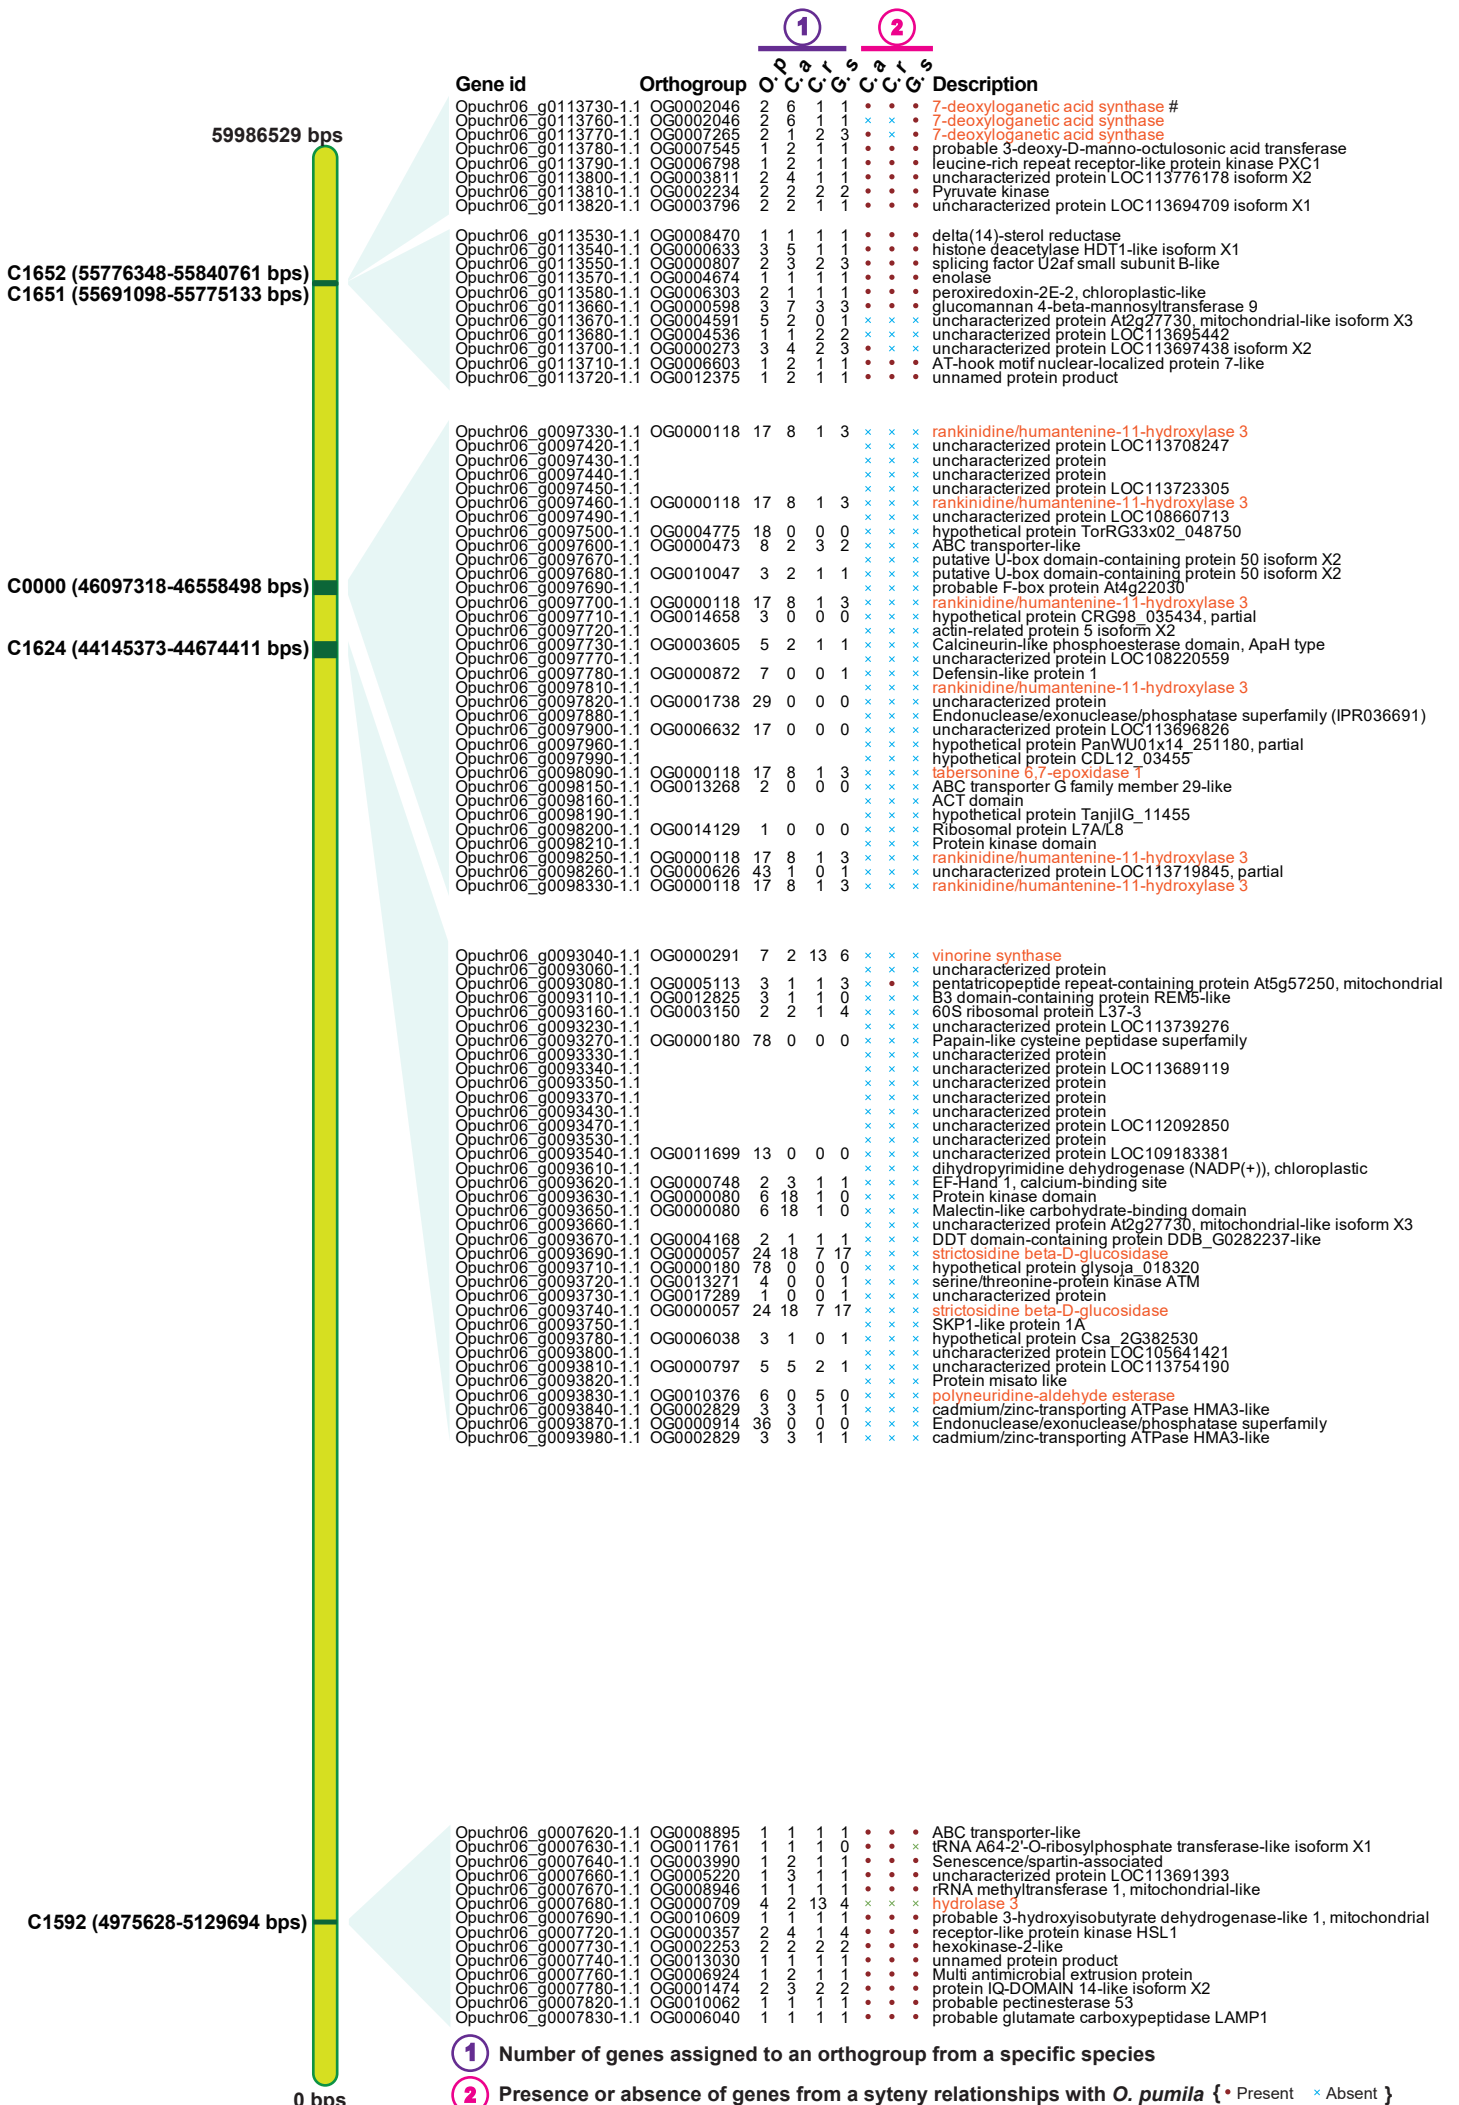

①

Number of genes assigned to an orthogroup from a specific species

②

Presence or absence of genes from a syntenic relationships with *O. pumila* { • Present \* Absent }

**Supplementary Fig. 45. Monoterpene indole alkaloid (MIA) gene-clusters identified in chromosome 6 of the *Ophiorrhiza* genome assembly.** The position of the gene-cluster is scaled based on chromosome size and its physical position on the chromosome. The gene description, colored as orange, represents genes with functions associated with MIA biosynthesis. O.p: *Ophiorrhiza pumila*; C.a: *Camptotheca acuminata*; C.r: *Catharanthus roseus*; G.s: *Gelsemium sempervirens*.

40657988 bps

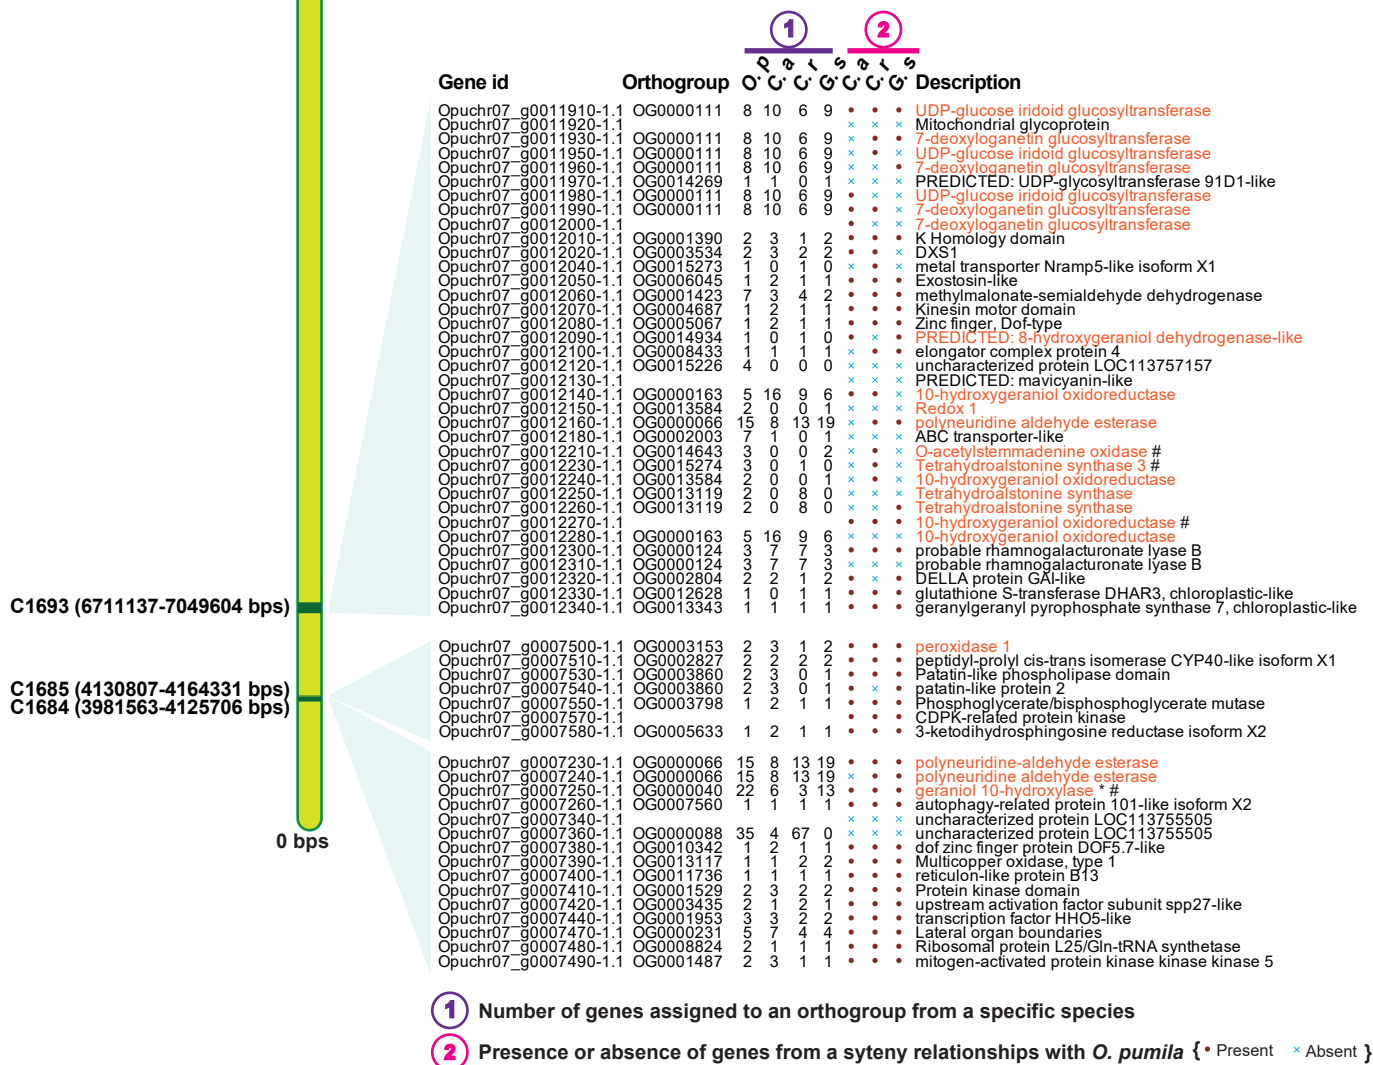

**Supplementary Fig. 46. Monoterpene indole alkaloid (MIA) gene-clusters identified in chromosome 7 of the *Ophiorrhiza* genome assembly.** The position of the gene-cluster is scaled based on chromosome size and its physical position on the chromosome. The gene description, colored as orange, represents genes with functions associated with MIA biosynthesis. O.p: *Ophiorrhiza pumila*; C.a: *Camptotheca acuminata*; C.r: *Catharanthus roseus*; G.s: *Gelsemium sempervirens*.

38998203 bps

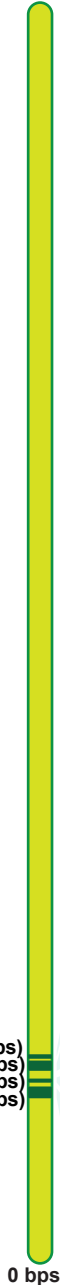

C1749 (6328189-6466268 bps)  
 C1748 (5956420-6273297 bps)  
 C1747 (5588399-5716012 bps)  
 C1746 (5103475-5469126 bps)

| Gene id               | Orthogroup | 1  |    |    |    |   |   | 2 |   |   |   |   |                                                                     | Description |
|-----------------------|------------|----|----|----|----|---|---|---|---|---|---|---|---------------------------------------------------------------------|-------------|
|                       |            | O  | p  | C  | a  | r | G | O | p | C | a | r | G                                                                   |             |
| Opuchr08_g0011230-1.1 | OG0007700  | 16 | 0  | 0  | 0  | 0 | * | * | * | * | * | * | Sarpagan Bridge Enzyme                                              |             |
| Opuchr08_g0011240-1.1 | OG0007700  | 16 | 0  | 0  | 0  | 0 | * | * | * | * | * | * | uncharacterized protein                                             |             |
| Opuchr08_g0011270-1.1 | OG0002007  | 4  | 1  | 1  | 3  | 0 | * | * | * | * | * | * | Sarpagan Bridge Enzyme                                              |             |
| Opuchr08_g0011290-1.1 | OG0002007  | 4  | 1  | 1  | 3  | 0 | * | * | * | * | * | * | geraniol synthase                                                   |             |
| Opuchr08_g0011340-1.1 | OG0014617  | 5  | 0  | 0  | 0  | 0 | * | * | * | * | * | * | uncharacterized protein LOC113690632                                |             |
| Opuchr08_g0011350-1.1 | OG0010319  | 1  | 1  | 2  | 3  | 0 | * | * | * | * | * | * | hypothetical protein CDL12_26059                                    |             |
| Opuchr08_g0011410-1.1 | OG0000007  | 40 | 13 | 26 | 24 | 0 | * | * | * | * | * | * | Terpenoid cyclases/protein prenyltransferase alpha-alpha toroid     |             |
| Opuchr08_g0011430-1.1 | OG0000007  | 40 | 13 | 26 | 24 | 0 | * | * | * | * | * | * | Cytochrome P450                                                     |             |
| Opuchr08_g0011440-1.1 | OG0014672  | 2  | 0  | 0  | 2  | 0 | * | * | * | * | * | * | Tabersonine 3-oxygenase                                             |             |
| Opuchr08_g0011440-1.1 | OG0014672  | 2  | 0  | 0  | 2  | 0 | * | * | * | * | * | * | geraniol synthase                                                   |             |
| Opuchr08_g0010560-1.1 | OG0000043  | 9  | 11 | 11 | 10 | 0 | * | * | * | * | * | * | geraniol synthase                                                   |             |
| Opuchr08_g0010570-1.1 | OG0000043  | 9  | 11 | 11 | 10 | 0 | * | * | * | * | * | * | uncharacterized protein                                             |             |
| Opuchr08_g0010580-1.1 | OG0000043  | 9  | 11 | 11 | 10 | 0 | * | * | * | * | * | * | ALA-interacting subunit 3-like                                      |             |
| Opuchr08_g0010650-1.1 | OG0000007  | 40 | 13 | 26 | 24 | 0 | * | * | * | * | * | * | tabersonine 3-oxygenase                                             |             |
| Opuchr08_g0010700-1.1 | OG0000178  | 53 | 0  | 0  | 0  | 0 | * | * | * | * | * | * | uncharacterized protein LOC113704124                                |             |
| Opuchr08_g0010710-1.1 | OG0000178  | 53 | 0  | 0  | 0  | 0 | * | * | * | * | * | * | Tabersonine 3-oxygenase                                             |             |
| Opuchr08_g0010720-1.1 | OG0000178  | 53 | 0  | 0  | 0  | 0 | * | * | * | * | * | * | uncharacterized protein                                             |             |
| Opuchr08_g0010750-1.1 | OG0000178  | 53 | 0  | 0  | 0  | 0 | * | * | * | * | * | * | Tabersonine 3-oxygenase                                             |             |
| Opuchr08_g0010760-1.1 | OG0011713  | 2  | 0  | 9  | 1  | 0 | * | * | * | * | * | * | Sarpagan Bridge Enzyme                                              |             |
| Opuchr08_g0010940-1.1 | OG0004775  | 18 | 0  | 0  | 0  | 0 | * | * | * | * | * | * | hypothetical protein L484_012563                                    |             |
| Opuchr08_g0010950-1.1 | OG0014672  | 2  | 0  | 0  | 2  | 0 | * | * | * | * | * | * | geraniol synthase                                                   |             |
| Opuchr08_g0011020-1.1 | OG0004231  | 21 | 0  | 0  | 0  | 0 | * | * | * | * | * | * | uncharacterized protein LOC113693287                                |             |
| Opuchr08_g0011030-1.1 | OG0005775  | 12 | 0  | 0  | 0  | 0 | * | * | * | * | * | * | uncharacterized protein LOC113728951                                |             |
| Opuchr08_g0011040-1.1 | OG0005775  | 12 | 0  | 0  | 0  | 0 | * | * | * | * | * | * | geraniol synthase                                                   |             |
| Opuchr08_g0011060-1.1 | OG0002889  | 1  | 4  | 1  | 2  | 0 | * | * | * | * | * | * | probable folate-biopterin transporter 2                             |             |
| Opuchr08_g0011080-1.1 | OG0006449  | 1  | 3  | 1  | 1  | 0 | * | * | * | * | * | * | mediator of RNA polymerase II transcription subunit 30-like         |             |
| Opuchr08_g0011090-1.1 | OG0004145  | 2  | 2  | 2  | 2  | 0 | * | * | * | * | * | * | ubiquitin carboxyl-terminal hydrolase 22                            |             |
| Opuchr08_g0011110-1.1 | OG0004145  | 2  | 2  | 2  | 2  | 0 | * | * | * | * | * | * | Rhodanese-like domain-containing protein 14, chloroplastic, partial |             |
| Opuchr08_g0011140-1.1 | OG0004145  | 2  | 2  | 2  | 2  | 0 | * | * | * | * | * | * | hypothetical protein EUGRSUZ_C00375, partial                        |             |
| Opuchr08_g0009960-1.1 | OG0000060  | 6  | 8  | 17 | 6  | 0 | * | * | * | * | * | * | rankinidine/humantenine-11-O-methyltransferase                      |             |
| Opuchr08_g0009970-1.1 | OG0000060  | 6  | 8  | 17 | 6  | 0 | * | * | * | * | * | * | 10-hydroxycamptothecin O-methyltransferase                          |             |
| Opuchr08_g0010000-1.1 | OG0000060  | 6  | 8  | 17 | 6  | 0 | * | * | * | * | * | * | hypothetical protein CDL12_09769                                    |             |
| Opuchr08_g0010010-1.1 | OG0013612  | 8  | 0  | 0  | 0  | 0 | * | * | * | * | * | * | hypothetical protein CFOL_v3_27647                                  |             |
| Opuchr08_g0010040-1.1 | OG0000043  | 9  | 11 | 11 | 10 | 0 | * | * | * | * | * | * | geraniol synthase                                                   |             |
| Opuchr08_g0010050-1.1 | OG0001817  | 2  | 3  | 2  | 1  | 0 | * | * | * | * | * | * | ClpP/protonase-like domain superfamily                              |             |
| Opuchr08_g0010070-1.1 | OG0009184  | 1  | 1  | 1  | 1  | 0 | * | * | * | * | * | * | BTB/POZ domain-containing protein NPY1                              |             |
| Opuchr08_g0010100-1.1 | OG0000428  | 7  | 3  | 4  | 11 | 0 | * | * | * | * | * | * | Geraniol 10-hydroxylase                                             |             |
| Opuchr08_g0010110-1.1 | OG0000350  | 5  | 6  | 3  | 3  | 0 | * | * | * | * | * | * | patatin-like protein 1                                              |             |
| Opuchr08_g0010120-1.1 | OG0000350  | 5  | 6  | 3  | 3  | 0 | * | * | * | * | * | * | PREDICTED: patatin-like protein 2                                   |             |
| Opuchr08_g0009230-1.1 | OG0008683  | 1  | 1  | 1  | 1  | 0 | * | * | * | * | * | * | chorismate mutase 2-like                                            |             |
| Opuchr08_g0009240-1.1 | OG0008683  | 1  | 1  | 1  | 1  | 0 | * | * | * | * | * | * | Cyclophilin-like domain superfamily                                 |             |
| Opuchr08_g0009250-1.1 | OG0011898  | 1  | 1  | 1  | 0  | 0 | * | * | * | * | * | * | Polar localization during asymmetric division and redistribution    |             |
| Opuchr08_g0009280-1.1 | OG0000178  | 53 | 0  | 0  | 0  | 0 | * | * | * | * | * | * | uncharacterized protein LOC113729443                                |             |
| Opuchr08_g0009340-1.1 | OG0000007  | 40 | 13 | 26 | 24 | 0 | * | * | * | * | * | * | tabersonine 3-oxygenase                                             |             |
| Opuchr08_g0009430-1.1 | OG0011699  | 13 | 0  | 0  | 0  | 0 | * | * | * | * | * | * | geraniol synthase                                                   |             |
| Opuchr08_g0009440-1.1 | OG0000043  | 9  | 11 | 11 | 10 | 0 | * | * | * | * | * | * | viridiflorene synthase-like                                         |             |
| Opuchr08_g0009450-1.1 | OG0000043  | 9  | 11 | 11 | 10 | 0 | * | * | * | * | * | * | uncharacterized protein                                             |             |
| Opuchr08_g0009460-1.1 | OG0015287  | 1  | 0  | 0  | 2  | 0 | * | * | * | * | * | * | tabersonine 6,7-epoxidase isoform 1                                 |             |
| Opuchr08_g0009480-1.1 | OG0002395  | 5  | 0  | 22 | 0  | 0 | * | * | * | * | * | * | uncharacterized protein LOC113718472                                |             |
| Opuchr08_g0009540-1.1 | OG0000923  | 8  | 0  | 2  | 0  | 0 | * | * | * | * | * | * | NdhH (chloroplast)                                                  |             |
| Opuchr08_g0009550-1.1 | OG0000923  | 8  | 0  | 2  | 0  | 0 | * | * | * | * | * | * | geraniol synthase                                                   |             |
| Opuchr08_g0009580-1.1 | OG0000007  | 40 | 13 | 26 | 24 | 0 | * | * | * | * | * | * | tabersonine 3-oxygenase                                             |             |
| Opuchr08_g0009590-1.1 | OG0000007  | 40 | 13 | 26 | 24 | 0 | * | * | * | * | * | * | unnamed protein product                                             |             |
| Opuchr08_g0009600-1.1 | OG0000007  | 40 | 13 | 26 | 24 | 0 | * | * | * | * | * | * | tabersonine 3-oxygenase                                             |             |
| Opuchr08_g0009650-1.1 | OG0015288  | 1  | 2  | 1  | 0  | 0 | * | * | * | * | * | * | 11S globulin subunit beta-like isoform X1                           |             |
| Opuchr08_g0009660-1.1 | OG0000040  | 22 | 6  | 3  | 13 | 0 | * | * | * | * | * | * | geraniol 10-hydroxylase                                             |             |
| Opuchr08_g0009690-1.1 | OG0000043  | 9  | 11 | 11 | 10 | 0 | * | * | * | * | * | * | uncharacterized protein LOC100798851                                |             |
| Opuchr08_g0009700-1.1 | OG0000043  | 9  | 11 | 11 | 10 | 0 | * | * | * | * | * | * | geraniol synthase                                                   |             |
| Opuchr08_g0009730-1.1 | OG0002045  | 10 | 4  | 1  | 2  | 0 | * | * | * | * | * | * | uncharacterized protein LOC113689764                                |             |
| Opuchr08_g0009740-1.1 | OG0000043  | 9  | 11 | 11 | 10 | 0 | * | * | * | * | * | * | geraniol synthase                                                   |             |
| Opuchr08_g0009750-1.1 | OG0000007  | 40 | 13 | 26 | 24 | 0 | * | * | * | * | * | * | tabersonine 3-oxygenase                                             |             |
| Opuchr08_g0009760-1.1 | OG0000007  | 40 | 13 | 26 | 24 | 0 | * | * | * | * | * | * | tabersonine 3-oxygenase                                             |             |
| Opuchr08_g0009790-1.1 | OG0000007  | 40 | 13 | 26 | 24 | 0 | * | * | * | * | * | * | tabersonine 3-oxygenase                                             |             |
| Opuchr08_g0009840-1.1 | OG0017320  | 1  | 0  | 0  | 0  | 0 | * | * | * | * | * | * | unnamed protein product                                             |             |
| Opuchr08_g0009850-1.1 | OG0000007  | 40 | 13 | 26 | 24 | 0 | * | * | * | * | * | * | Tabersonine 3-oxygenase                                             |             |
| Opuchr08_g0009860-1.1 | OG0000007  | 40 | 13 | 26 | 24 | 0 | * | * | * | * | * | * | tabersonine 3-oxygenase                                             |             |

① Number of genes assigned to an orthogroup from a specific species  
 ② Presence or absence of genes from a syteny relationships with *O. pumila* { \* Present \* Absent }

Supplementary Fig. 47. Monoterpene indole alkaloid (MIA) gene-clusters identified in chromosome 8 of the *Ophiorrhiza* genome assembly. The position of the gene-cluster is scaled based on chromosome size and its physical position on the chromosome. The gene description, colored as orange, represents genes with functions associated with MIA biosynthesis. O.p: *Ophiorrhiza pumila*; C.a: *Camptotheca acuminata*; C.r: *Catharanthus roseus*; G.s: *Gelsemium sempervirens*.

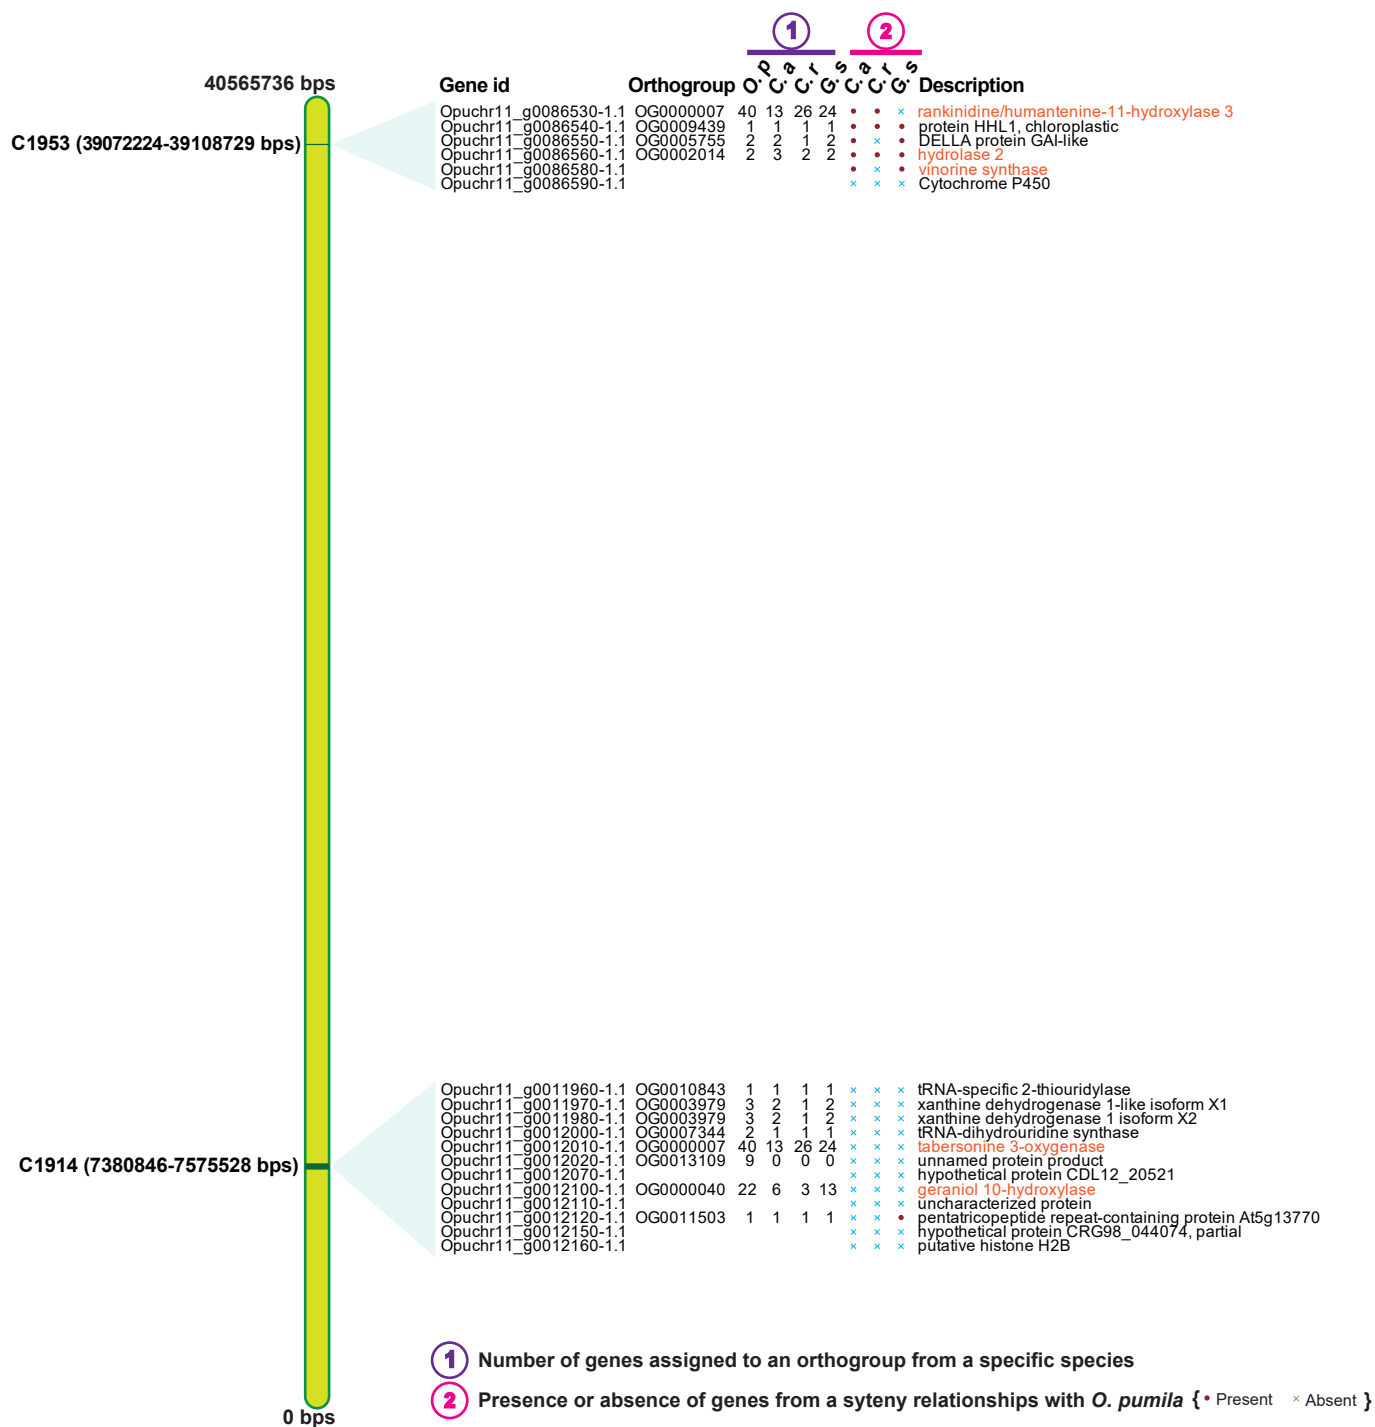

**Supplementary Fig. 48. Monoterpene indole alkaloid (MIA) gene-clusters identified in chromosome 11 of the *Ophiorrhiza* genome assembly.** The position of the gene-cluster is scaled based on chromosome size and its physical position on the chromosome. The gene description colored as orange represents genes with functions associated with MIA biosynthesis. O.p: *Ophiorrhiza pumila*; C.a: *Camptotheca acuminata*; C.r: *Catharanthus roseus*; G.s: *Gelsemium sempervirens*.
