# Supplementary material for: Chromosome-level genome assembly of Ophiorrhiza pumila reveals the evolution of camptothecin biosynthesis
Source: PubMed Central journal article supplement (PMC7810986; doi:10.1038/s41467-020-20508-2), 2021-01-15
Supplement: 41467_2020_20508_MOESM4_ESM.pdf [file 41467_2020_20508_MOESM4_ESM.pdf]

## **Description of Additional Supplementary Files**

**Supplementary Data 1** Raw sequencing reads from different next-generation sequencing platforms used to derive *de novo* genome assembly.

**Supplementary Data 2** Parameters optimization and resulting assembly statistics for contig-level genome assembly using Canu (Selected assemblies are colored as orange).

**Supplementary Data 3** Parameters optimization and resulting assembly statistics for contig-level genome assembly using Falcon-unzip assembler (Selected assemblies are colored as orange).

**Supplementary Data 4** *Ophiorrhiza pumila* phased genome assembly statistics at different stages and combinations of scaffolding.

**Supplementary Data 5** List of primers used to perform Fluorescence in situ hybridization (FISH) analysis.

**Supplementary Data 6** Assembly statistics and metadata for published and publicly available chromosome scale plant genomes used to compare with *Ophiorrhiza pumila* reference genome assembly.

**Supplementary Data 7** *Ophiorrhiza pumila* genes annotated as transcription factors.

**Supplementary Data 8** Prediction and annotation of non-coding RNAs in the *Ophiorrhiza pumila* reference genome.

**Supplementary Data 9** List of tRNA predicted in *Ophiorrhiza pumila* genome using tRNAScan tool.

**Supplementary Data 10** Summary of non-coding RNAs predicted in the *Ophiorrhiza pumila* reference genome.

**Supplementary Data 11** Predicted telomere regions and associated repeats of *Ophiorrhiza pumila* genome assembly.

**Supplementary Data 12** Transposable elements predicted and compared for eight plant genomes.

**Supplementary Data 13** Composition of growth media used for <sup>15</sup>N stable isotope labeling of *Ophiorrhiza pumila* hairy root metabolome.

**Supplementary Data 14** Nitrogen-containing metabolites identified in *Ophiorrhiza pumila* metabolome with assigned chemical annotation.

**Supplementary Data 15** Accumulation levels of metabolites identified in this study across six tissues of *Ophiorrhiza pumila*.

**Supplementary Data 16** Manually curated database for functionally characterized enzymes associated with monoterpene indole alkaloids biosynthesis used for homology-based annotation *Ophiorrhiza pumila* gene models.

**Supplementary Data 17** Annotation of *Ophiorrhiza pumila* gene models using Blast search based on monoterpene indole alkaloids biosynthesis enzyme database curated in this study.

**Supplementary Data 18** *Ophiorrhiza pumila* genes assigned to monoterpene indole alkaloids (MIAs) biosynthesis pathway based on sequence homology with functionally characterized genes and used as criteria to select MIA gene-cluster.

**Supplementary Data 19** Metabolite-Genes relationships based on Pearson correlation coefficient cutoff as 0.7 and *p*-value cutoff as 0.05.

**Supplementary Data 20** OrthoFinder based gene classification using *Ophiorrhiza pumila* and 12 other plant genomes.

**Supplementary Data 21** Posterior rate for gain, loss, expansion, and contraction calculated for the gene families.

**Supplementary Data 22** Synonymous substitution rate (Ks)-median for orthogroups assigned to genes associated with secoiridoid and MIA biosynthesis pathways.

**Supplementary Data 23** Metabolite gene-clusters with associated biochemical reactions.

**Supplementary Data 24** Metabolite gene-clusters identified in the *Ophiorrhiza pumila* genome.

**Supplementary Data 25** Synonymous substitution rate (Ks) for gene pairs associated with syntenic relationship between *Ophiorrhiza pumila* and four plant species, namely, *Coffea canephora*, *Catharanthus roseus*, *Gelsemium sempervirens*, and *Camptotheca acuminata*.

**Supplementary Data 26** Synonymous substitution rate (Ks) for genes assigned to *Ophiorrhiza pumila* metabolite gene-clusters and associated with syntenic relationship between *O. pumila* and three other plant species, namely, *Catharanthus roseus*, *Gelsemium sempervirens*, and *Camptotheca acuminata*.
